# Supplementary material for: The fusion protein SS18-SSX1 employs core Wnt pathway transcription factors to induce a partial Wnt signature in synovial sarcoma
Source: PubMed Central journal article supplement (PMC4764983; doi:10.1038/srep22113), 2016-02-24
Supplement: srep22113-s1.pdf [file srep22113-s1.pdf]

# **The fusion protein SS18-SSX1 employs core Wnt pathway transcription factors to induce a partial Wnt signature in synovial sarcoma**

**Luisa Cironi, Tanja Petricevic, Victor Fernandes Vieira, Paolo Provero\*, Carlo Fusco, Sandrine Cornaz, Giulia Fregni, Igor Letovanec, Michel Aguet and Ivan Stamenkovic**

## **SUPPLEMENTARY DATA**

### **Supplementary Figure S1**

Specificity of SS18-SSX mediated Axin-2 induction. A) Schematic representation of V5 tagged SS18-SSX1 fusion protein and tagged SS18-SSX and SS18 truncated forms. B) Immunofluorescence analysis of C3H10T1/2 infected with the indicated tagged proteins, anti V5, anti Xpress, mouse immunoglobulins and an Alexafluor 488 goat anti mouse secondary antibody were used. Scale bar 5µm. C) Western blot analysis of C3H10T1/2 infected with V5-tagged SS18. Mouse anti V5, anti tubulin and HRP-conjugated goat anti mouse secondary antibody were used. D) Quantitative RT-PCR analysis of Axin-2 transcripts in C3H10T1/2 infected with the indicated tagged proteins or an empty pLIVc vector. Cells were selected for 10 days with 1µg/ml puromycin. The analysis was done using the relative quantitation method (Applied Biosystems) and normalizing to an endogenous control (GAPDH). Results are representative of three independent experiments. Bar represent the SD of triplicate PCR tests.

### **Supplementary Figure S2**

Divergent occupancy of Histone H3 AcK9 at the *Axin-2* promoter in C3H10T1/2 and STO. A) Q-PCR of *AXIN2* transcripts in C3H10T1/2<sup>pLIVc</sup> (pLIVc), C3H10T1/2<sup>SS18-SSX1-V5</sup> (SS-V5) and STO cells infected with SS18-SSX-V5 or empty pLIVc. Cells were stimulated with 250nM TSA or DMSO for 16hrs. Results are represented as the 2DDCT ratio of TSA stimulated samples versus DMSO controls. B) Quantitative RT-PCR analysis of Axin-2 transcripts in C3H10T1/2 and STO cell lines. C) Chromatin immunoprecipitation detecting acetylated Histone H3 bound to the Axin-2 promoter. Cross-linked chromatin was sonicated and immunoprecipitated with an anti Histone H3 AcK9 antibody or rabbit IgG. Co-immunoprecipitated DNA was quantified by real-time PCR using primer pairs annealing at the mouse Axin-2 promoter region at the indicated

positions. The results are expressed as fold enrichment over the values obtained with rabbit IgG precipitates, after normalization for the total amount of input chromatin. Results are representative of three independent experiments. Error bars represent the SD of triplicate PCR tests.

### **Supplementary Figure S3**

Representative fluorescence microscopy images of Proximity ligation assays (PLA) in C3H10T1/2<sup>pLIVc</sup> (pLIVc) and in C3H10T1/2<sup>SS18-SSX1-V5</sup> (SS-V5) using antibodies against the indicated proteins. Only one of the two antibodies was used in the negative controls. Images were obtained with a confocal microscope as described in material and methods. Scale bar 5µm.

### **Supplementary Figure S4**

Expression and localization of SS18-SSX-HA, SS18-SSX-V5, HDAC1, TLE and TCF3/4 proteins. Representative immunofluorescence microscopy images obtained using the indicated antibodies in C3H10T1/2 cells. Proteins are visualized with Alexa fluor488 conjugated secondary antibodies. Images were obtained with a confocal microscope as described in material and methods. Scale bar 5µm.

### **Supplementary Figure S5**

SS18-SSX-V5 interactions with HDAC1, LEF1, TCF4 and TLE in synovial sarcoma cell lines. Representative fluorescence microscopy images of SS18-SSX-V5 immuno-staining (IF) and proximity ligation assays (PLA). FUJI and HS-SYII cells were infected with V5-tagged SS18-SSX1 lentiviral plasmids. For PLA a mouse anti-V5 antibody was used with either rabbit anti-HDAC1, anti-TCF4, anti-TLE1/2/3/4 or a goat anti-LEF1 antibody (as indicated). SS18-SSX-V5 staining was revealed using an alexa fluor 594-conjugated donkey anti-mouse antibody. Cells lacking the tagged protein provided negative controls. Scale bar: 5µm.

### **Supplementary Figure S6**

Preservation of antibodies reactivity with DAPI pre-staining. C3H10T1/2 cells were pre-treated with 5µM DAPI or PBS for 30 minutes, fixed and stained with the indicated antibodies and alexa fluor 488 conjugated secondary antibodies. Representative Images, obtained with a confocal microscope, are shown. Scale bar 5µm.

### Supplementary Figure S7

SS18-SSX expression changes  $\beta$ -catenin localization and promotes its degradation.

A) Representative fluorescence microscopy images of  $\beta$ -catenin in C3H10T1/2<sup>pLIVc</sup> (pLIVc) and C3H10T1/2<sup>SS18-SSX1-V5</sup> (SS-V5) cells, C3H10T1/2 cells stimulated for 24 hrs with recombinant Wnt3a (WNT3a), STO, and primary SS11 cells. Cells were incubated with monoclonal anti- $\beta$ -catenin antibody or mouse IgG1 as indicated, anti-mouse Alexa fluor 488- conjugated secondary antibody and counter-stained with DAPI. Images were obtained with a confocal microscope as described in material and methods. Scale bar 5 $\mu$ m.(B) Western blot analysis of  $\beta$ -catenin (a) and phospho  $\beta$ -catenin (b) in synchronized wild type C3H10T1/2 (wt), C3H10T1/2<sup>pLIVc</sup> (pLIVc) and C3H10T1/2<sup>SS18-SSX1-V5</sup> (SS-V5) treated with 10 $\mu$ M MG132 or DMSO for 24 hrs. Mouse anti-tubulin antibody was used as loading control (c).

### Supplementary Figure S8

Representative fluorescence microscopy images of Proximity ligation assays (PLA) reported in figure 7. Images were obtained with a confocal microscope as described in material and methods. Scale bar 5 $\mu$ m.

## SUPPLEMENTARY EXPERIMENTAL PROCEDURES

### Tumor specimens

Tumor samples SS11 and SS12 were mechanically fragmented and dissociated using enzymatic digestion for 40 minutes at 37°C in IMDM containing 0.5mg/ml collagenase type II, 0.5mg/ml collagenase type IV, 0.1mg/ml DNase I, 1% Antibiotic-Antimycotic (Gibco- Life Technologies). After erythrolysis cells were passed through a 70 $\mu$ m cell strainer and cultured as spheres in IMDM (Life Technologies), supplemented with 20% knockout serum replacement (Life Technologies), 10 ng/mL of recombinant human epidermal growth factor (Invitrogen), 10 ng/mL of recombinant human basic fibroblast growth factor (Invitrogen), 10 ng/mL of leukemia inhibitory factor (Millipore) and 1% penicillin/streptomycin (Life Technologies).

### Constructs and cDNA Cloning

cDNA clones, encoding the human *SS18-SSX1* fusion gene in frame with a V5 epitope tag.or in frame with an HA tag were obtained using previously described constructs [50] as template for PCR amplification. For SS18-SSX1-V5, primers used were: SS18-kzFw and SSXnoStopBamHI- R, a N-terminal fragment of *SS18-SSX1* resulting from BstBI digestion

was first inserted into the homemade pLIVc puro lentiviral expression vector into the PmeI blunt site and the BstBI site. Subsequently a C-terminal SS18-SSX1 fragment obtained by digestion with BstBI and BamHI was inserted at the corresponding sites in frame with the V5 epitope tag. For SS18-SSX1-HA primers used were: SS18-kzFw and EcoRI-stop-SSX-HA-R, the resulting fragments were inserted into the pLIVc puro lentiviral expression vector into the PmeI blunt site and the EcoRI site. cDNA clones, encoding the human *SS18* gene, the truncated form *SS18-1-412-V5* and the *SSXfrag.-V5* were obtained using a TA cloning system (pEF6/V5-His TOPO, Invitrogen). *SS18-V5* and *SS18-1-412-V5* fragments were subsequently re-amplified using primers SS18-kzFw and V5-Stop-EcoRI-R and inserted into the pLIVc puro lentiviral expression vector into the PmeI blunt site and the EcoRI site. XP-SS18-SSX-161-491 template was obtained by sub-cloning into the Xpress pcDNA3.1his C vector (Invitrogen) cDNA fragments produced by cleaving at the BamHI sites a SS18-SSX1 clone previously inserted in the pEF6/V5-His TOPO vector (Invitrogen) in the antisense direction. XP-SS18-SSX-161-491 was subsequently re-amplified using primers on T7 and MluI-stopSSX1-R and inserted into the pLIVc puro lentiviral expression vector into the PmeI blunt site and the MluI site. cDNA clone, encoding the mouse *LEF-1* genes in frame with a C-terminal HA tag was obtained by insertion into the pLIVc puro lentiviral expression vector into the PmeI blunt site and the EcoRI site. The dominant negative mutant of LEF-1  $\Delta N$ -*LEF-1* (NM\_010703; nucleotides 1086–218), the TOP/FOP FLASH plasmids and the pLVRNAmir vector were a gift from Dr Huelsken (EPFL Lausanne, Switzerland). The mouse *Axin-2* promoter sequence from position –2954 to +2688 (Gene ID1203, +1 is the start codon on exon 1) cloned into the pGL3 basic vector was obtained from Adgene (Adgene plasmid 21275). Integrity of all constructs was verified by sequencing.

### **RNA extraction and Real time quantitative PCR**

Total RNA was isolated from frozen tumors using Trizol reagent (Invitrogen, Carlsbad, CA) according to the manufacturer's recommendations. An RNeasy Mini Kit (Qiagen, Hilden, Germany) was used for total RNA extraction from cultured cells. cDNA was obtained using an M-MLV reverse transcriptase and RNase H minus (Promega). Typically 500 ng of template total RNA and 250 ng of random hexamers were used per reaction. Real time-PCR amplification was performed in an ABI Prism 7700 instrument (Applied Biosystems) using a Fast start Universal SYBR GREEN master mix (Roche). Primers used are reported in table S7. Relative quantitation of targets, normalized with an endogenous control (mGAPDH, hCyclophilin or 18S), was performed using a comparative Ct method (Applied Biosystems). In some cases the absolute quantitation method (Applied Biosystems) was used.

### **Affymetrix microarrays and bioinformatic analysis.**

RNA extraction and quality assessment were performed as previously described ([Cironi et al., 2009](#)), quality-tested total RNA was used by the Lausanne DNA Array Facility (DAFL) to perform gene expression profile analysis on Affymetrix Mouse Gene 1.0 ST Arrays (C3H10T1/2 cells) and the UNI Lausanne Mouse 17K platform, described in the GEO database (<http://www.ncbi.nlm.nih.gov/geo>) under accession GPL4371 (STO cells), according to the manufacturer's recommendations (<http://www.unil.ch/dafl/>). Gene expression levels were obtained with RMA ([Irizarry et al., 2003](#)) using the Affymetrix Power Tools suite. Differential expression was determined by requiring a fold-change greater than 2 for SS18-SSX expression in C3H10T1/2 and using limma for SS18-SSX expression in STO cells and for WNT stimulation. Enrichment of various functional categories, detailed below, was performed by first translating the lists of differentially expressed probesets into lists of Entrez Gene ids using the annotation files provided by the manufacturer (version na30), and then performing exact Fisher tests. Gene Ontology ([Ashburner et al., 2000](#)) annotations were obtained from Entrez Gene (data downloaded march. 19, 2010). We used version 20100703 of the Gene Ontology. The imprinted genes listed by Geneimprint (<http://www.geneimprint.com>) and the Catalogue of Imprinted Genes at the University of Otago ([Morison et al., 2005](#)) <http://igc.otago.ac.nz> were downloaded from the corresponding web sites on June 15th 2010. Chromatin-associated proteins were downloaded from the chromdb site ([Gendler et al., 2008](#)) url on June 15th 2010. All gene symbols from these databases were converted into Entrez Gene ids using the gene\_info file obtained from the Entrez Gene ftp site. A list of Wnt targets was obtained from <http://www.stanford.edu/~rnusse/pathways/targets.html>, considering only mammalian genes and using Homologene to identify orthologous genes in species. KEGG pathway data were downloaded on March 19<sup>th</sup>, 2010. A list of CpG islands in the mouse genome (sequence version mm9) was obtained from the UCSC genome browser site. We then used the TSS coordinates predicted by UCSC to determine which transcripts have their TSS lying in such CpG islands. This list was converted into a list of Entrez gene ids using the conversion table provided by UCSC. Sarcoma signatures of reference ([Francis et al., 2007](#)) were obtained from the manuscript's supplemental material. Embryonic stem cell signatures were downloaded from the supplemental material of reference ([Ben-Porath et al., 2008](#)). Human genes included in these lists were translated into mouse genes using the one-to-one orthology relationships defined by Homologene, build 64 (<http://www.ncbi.nlm.nih.gov/homologene>).

### **Chromatin accessibility tests (ChART-PCR)**

Cells were detached with trypsin and washed twice with ice cold PBS. After counting  $10^7$  cells were resuspended in 900  $\mu$ l of buffer containing: 10mM Tris-HCl, pH 7.4, 10mM NaCl and

3mM MgCl<sub>2</sub> and left on ice for 10 minutes. After adding 10% NP-40 to 1% final concentration, cells were homogenized in a dounce homogenizer with 15 strokes. Nuclei were recovered by centrifugation at 700g for 10 minutes at 4°C, washed once in the same buffer, then washed in a buffer containing: 10mM Tris-HCl, pH 7.9, 50mM NaCl, 10mM MgCl<sub>2</sub>, 1mM DTT and 0.3M sucrose, and resuspended in the same buffer. Aliquots of 1 million nuclei were used for digestion reaction in a volume of 50 µl containing NEB buffer 4 and 60 U of MspI (New England Biolab, Ipswich, MA). Digestion was performed from 15 minutes to 1 h at 37°C and was terminated by the addition of an equal volume of stop solution (20mM Tris-HCl, pH 7.9, 600mM NaCl, 1% SDS, 10 mM EDTA and 400µg/ml proteinase K) followed by incubation at 55 °C for 16 hours. Control samples in which MspI was not added (not digested) and digestion reactions in which 6 µg of purified genomic DNA was used were included. After digestion DNA was extracted with phenol/chloroform, ethanol precipitated and re-suspended in 100µl of TE by incubating at 70°C for 15 minutes. qPCR was performed in triplicate using 2 and 5 µl of DNA, relative quantitation of target, normalized to GAPDH control, was performed using a comparative Ct method (Applied Biosystems). Primer pairs used for PCR amplification, spanning several regions of the *Axin-2* promoter, are listed in table S7, primers amplifying a fragment not containing any MspI site were also included.

### **Immunofluorescence**

For βcatenin staining, cells, grown on slides were fixed for 20 min at -20° C in 88% methanol, 12% PBS and permeabilized with phosphate buffer saline (PBS) containing 0.05% NP-40 for 5 minutes RT. For SS18-SSX, HDAC, TLE and LEF-1 staining cells were fixed for 15 min in 4% paraformaldehyde and permeabilized with phosphate buffer saline (PBS) containing 0.1% Triton X-100 for 20 minutes. Cells were blocked in 5% bovine serum albumin in PBS for 30 min and incubated with primary antibody or isotype controls at RT for 1 hour. Dilutions used were: monoclonal anti-βcatenin (1:500), 1:200 for mouse anti V5, anti Xpress and anti HDAC1, 1:50 for anti LEF-1, 1:100 for TLE1,2,3,4. Alexa fluor 488 conjugated secondary antibodies (molecular probes) were used for detection. Slides were counterstained with DAPI, mounted and imaged as described in the PLA procedure. The Z-stack was acquired with a line averaging of 16 passages and a zoom of 2.2.

### **Analysis of PLA images**

Proximity ligation assay images were analyzed using a script written in ImageJ macro language (<http://rsbweb.nih.gov/ij/>). Briefly, the script first process the Z-stack with the maximum intensity projection method, then it passes the resulting image to a Gaussian Blur filter (sigma=1), a rolling ball background subtraction algorithm (radius=10 pixels) and to a water-shedding algorithm. Finally the images were segmented using the Max Entropy algorithm (see

ImageJ documentation) and finally the PLA foci where counted using the Analyze Particle function.

## **SUPPLEMENTARY REFERENCES**

Ashburner, M., Ball, C.A., Blake, J.A., Botstein, D., Butler, H., Cherry, J.M., Davis, A.P., Dolinski, K., Dwight, S.S., Eppig, J.T., *et al.* (2000). Gene ontology: tool for the unification of biology. The Gene Ontology Consortium. *Nat Genet* 25, 25-29.

Ben-Porath, I., Thomson, M.W., Carey, V.J., Ge, R., Bell, G.W., Regev, A., and Weinberg, R.A. (2008). An embryonic stem cell-like gene expression signature in poorly differentiated aggressive human tumors. *Nat Genet* 40, 499-507.

Cironi, L., Provero, P., Riggi, N., Janiszewska, M., Suva, D., Suva, M.L., Kindler, V., and Stamenkovic, I. (2009). Epigenetic features of human mesenchymal stem cells determine their permissiveness for induction of relevant transcriptional changes by SS18-SSX1. *PloS one* 4, e7904.

Francis, P., Namlos, H.M., Muller, C., Eden, P., Fernebro, J., Berner, J.M., Bjerkehagen, B., Akerman, M., Bendahl, P.O., Isinger, A., *et al.* (2007). Diagnostic and prognostic gene expression signatures in 177 soft tissue sarcomas: hypoxia-induced transcription profile signifies metastatic potential. *BMC genomics* 8, 73.

Gendler, K., Paulsen, T., and Napoli, C. (2008). ChromDB: the chromatin database. *Nucleic Acids Res* 36, D298-302.

Irizarry, R.A., Bolstad, B.M., Collin, F., Cope, L.M., Hobbs, B., and Speed, T.P. (2003). Summaries of Affymetrix GeneChip probe level data. *Nucleic Acids Res* 31, e15.

Morison, I.M., Ramsay, J.P., and Spencer, H.G. (2005). A census of mammalian imprinting. *Trends Genet* 21, 457-465.

A

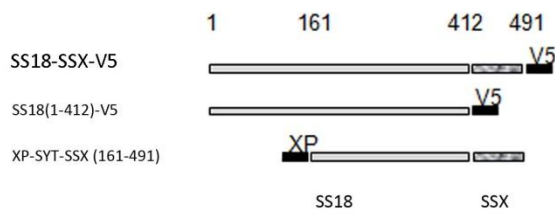

B

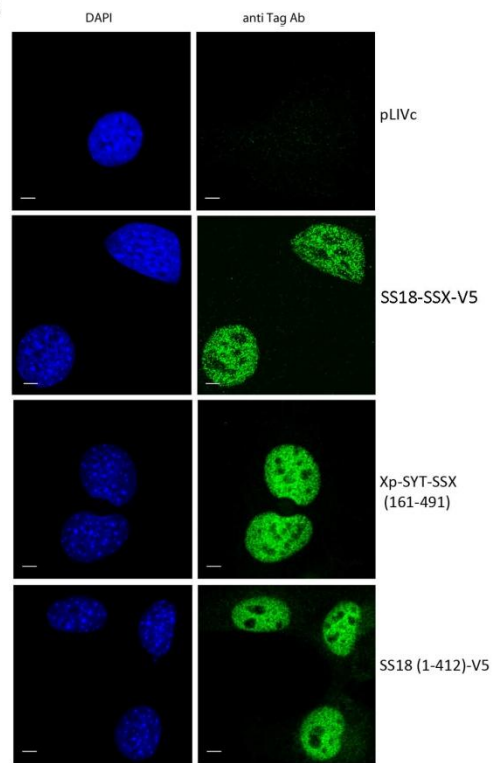

C

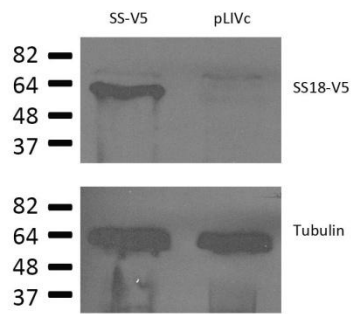

D

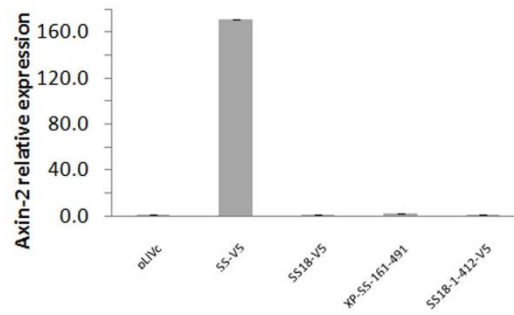



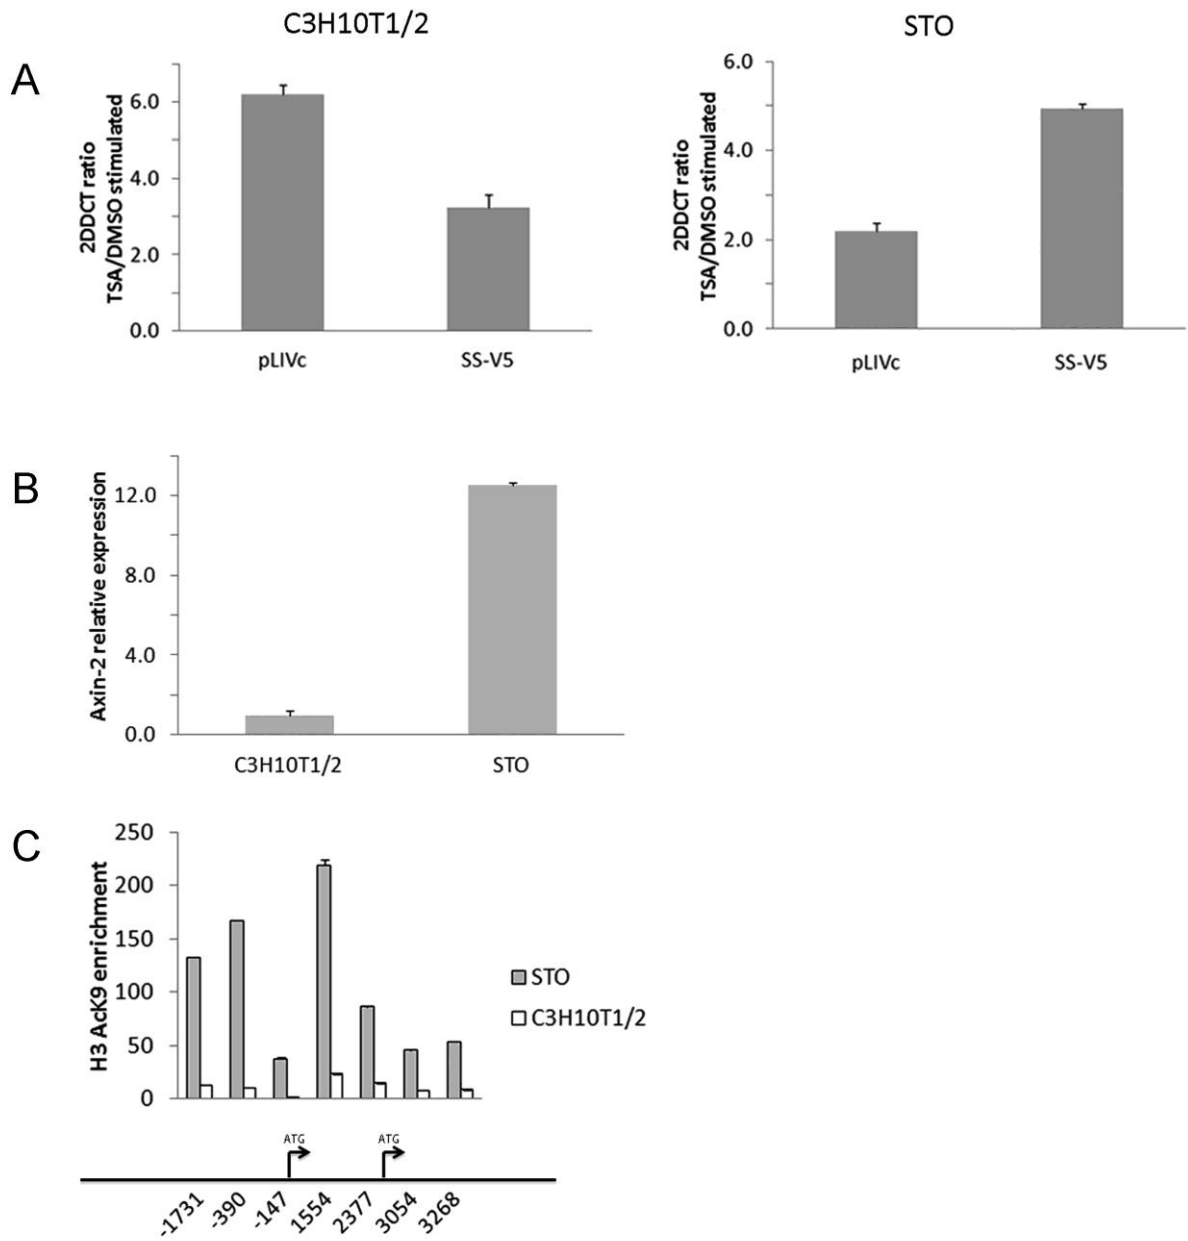

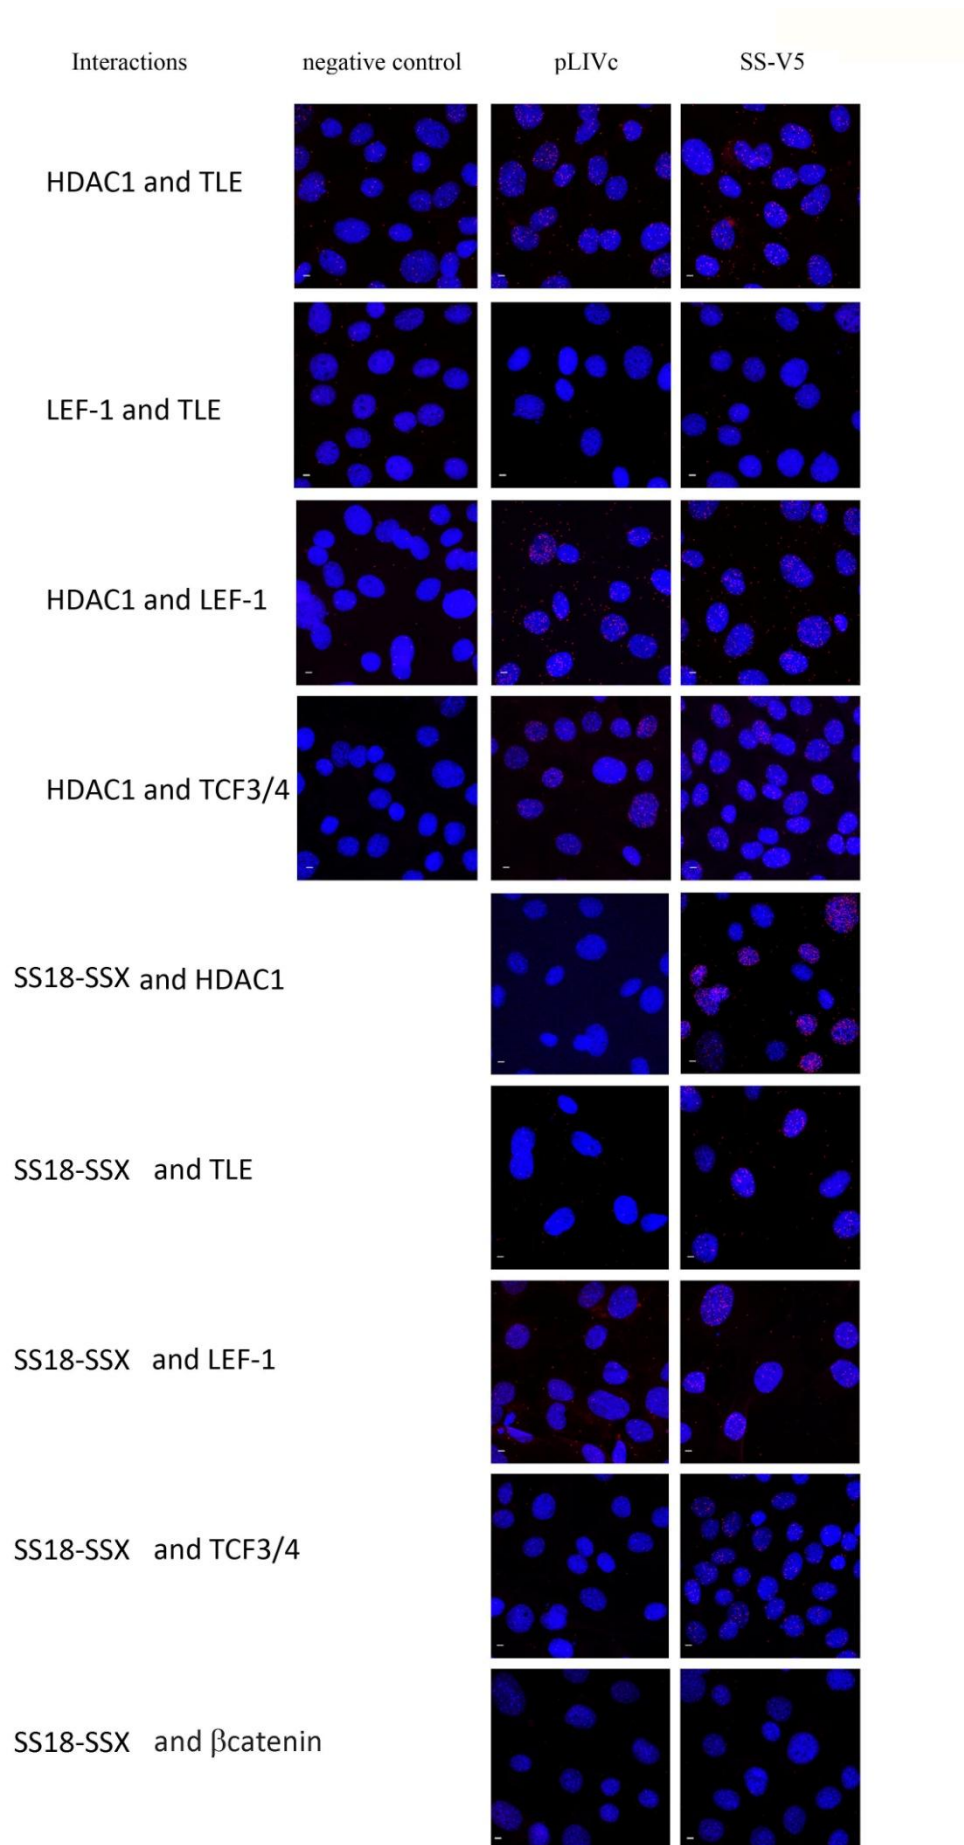

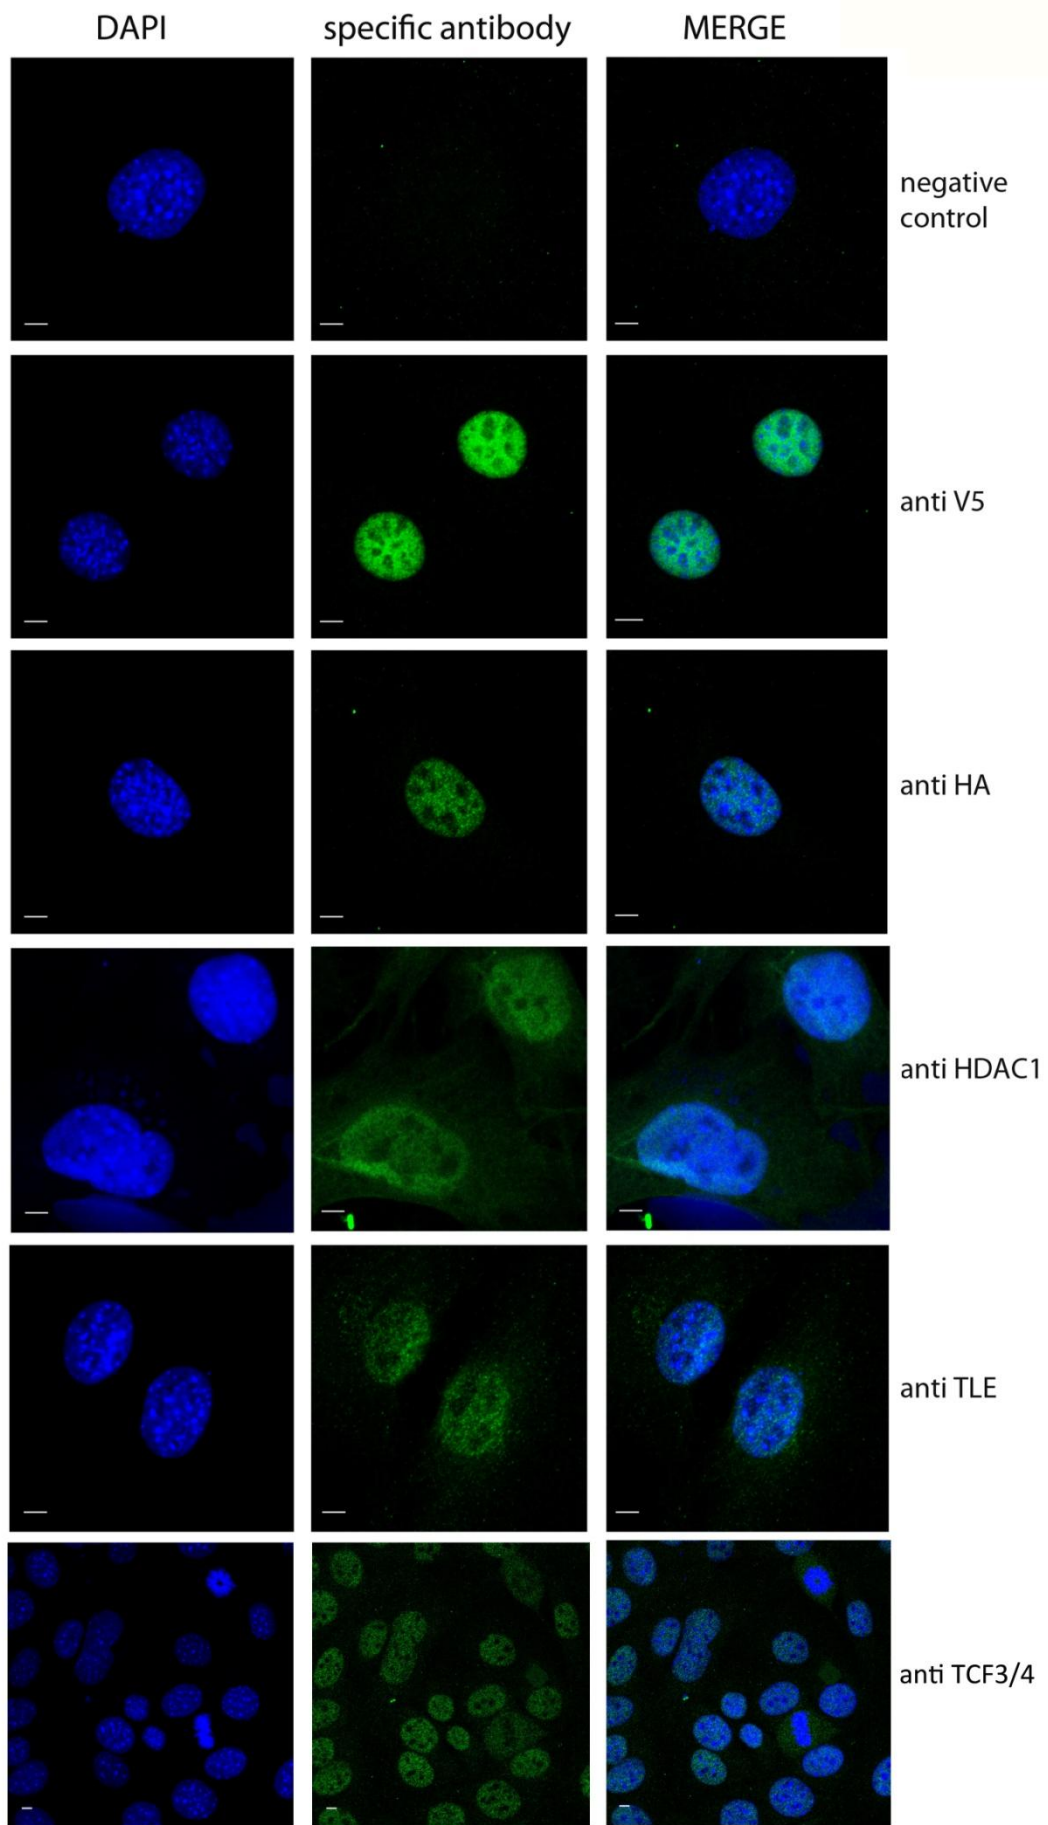

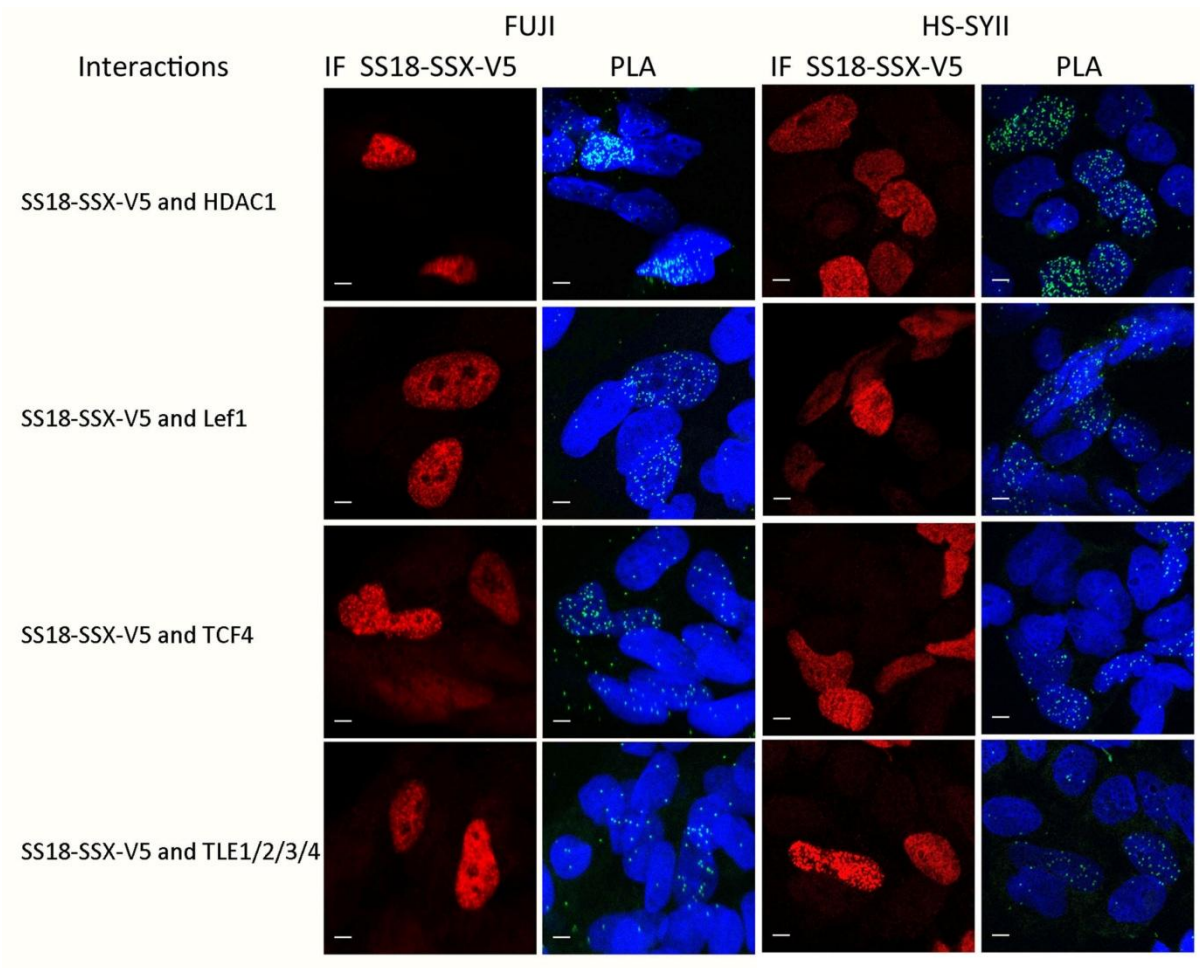

imunofluorescence

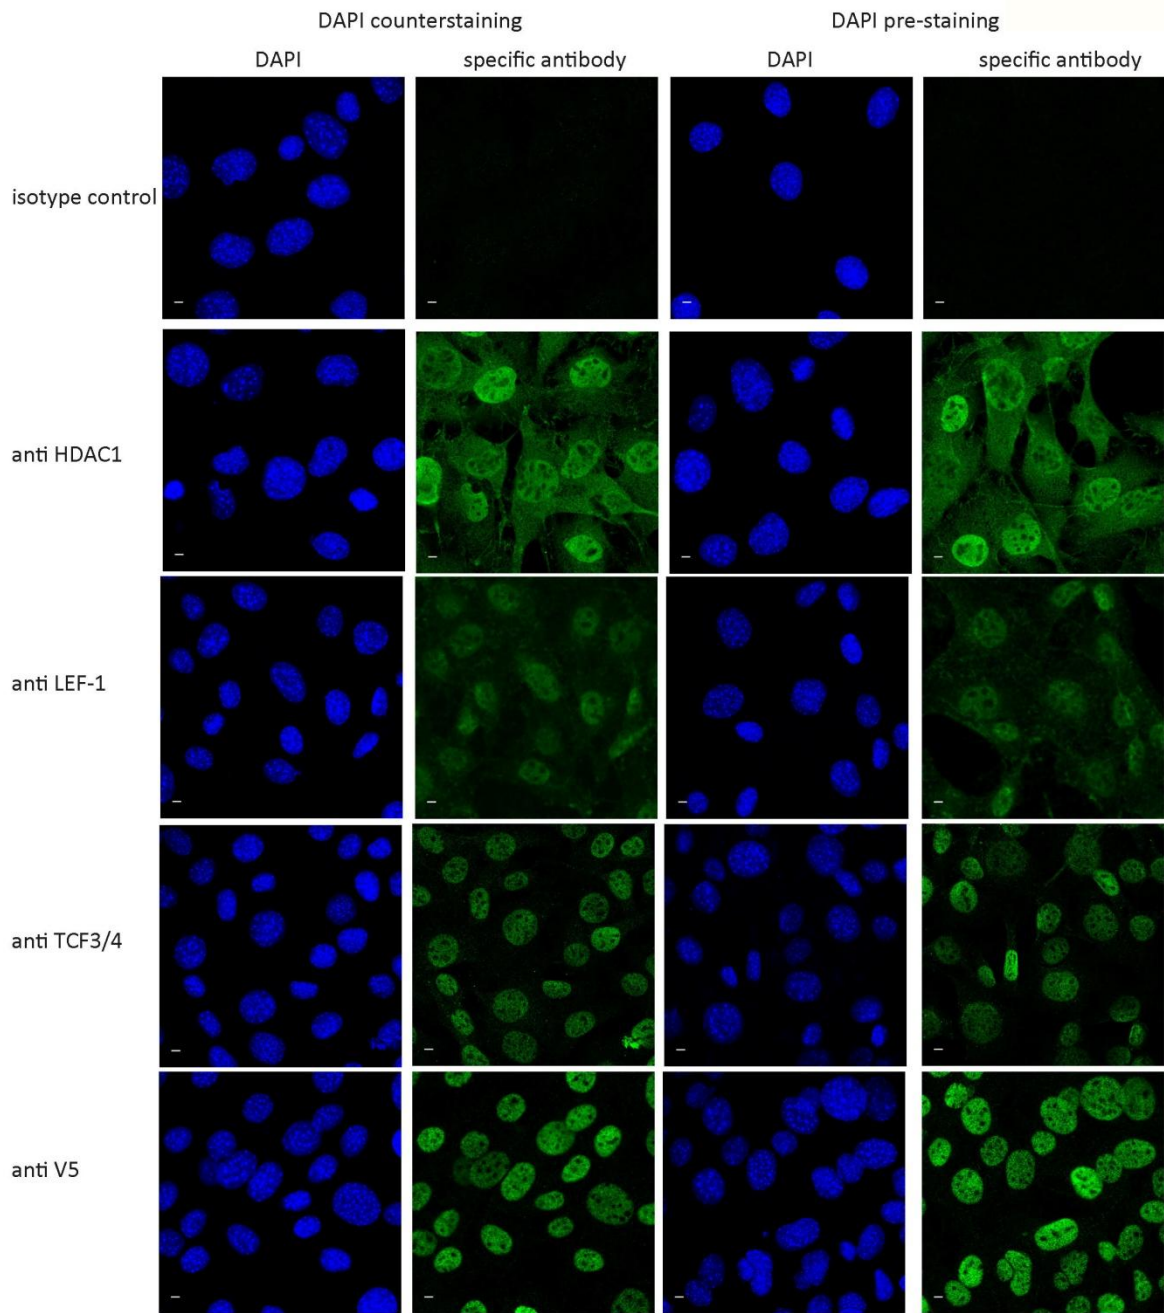



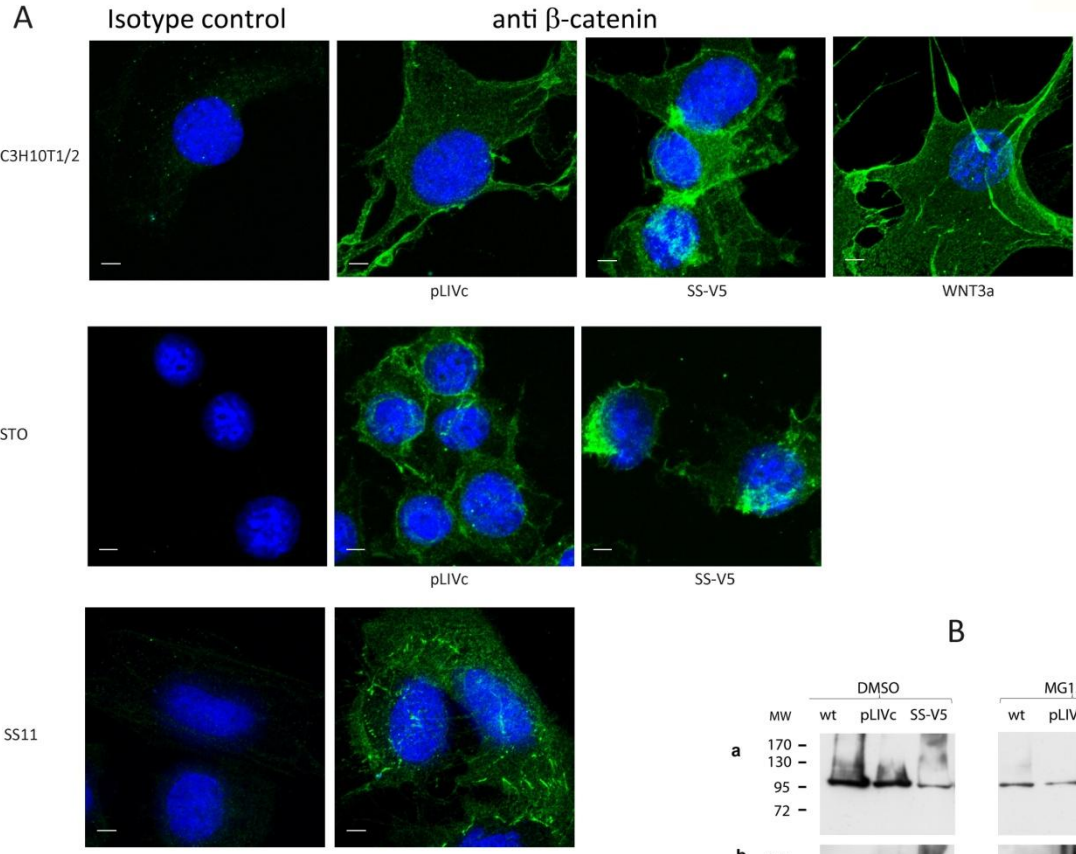

**B**

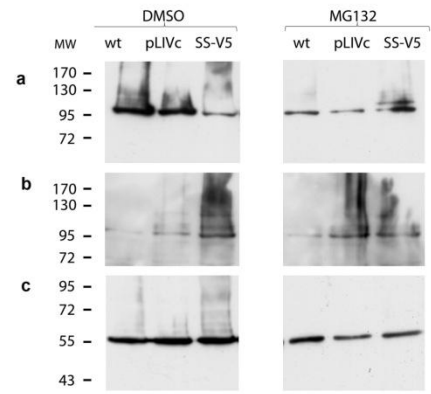

A  
HDAC1 and  $\beta$ -catenin interaction

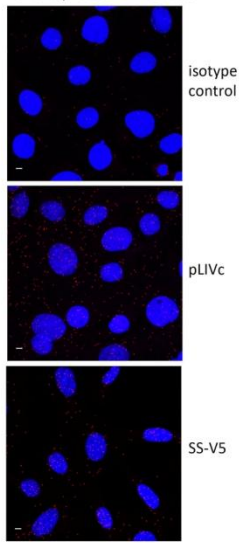

B

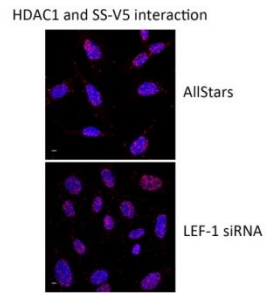

C

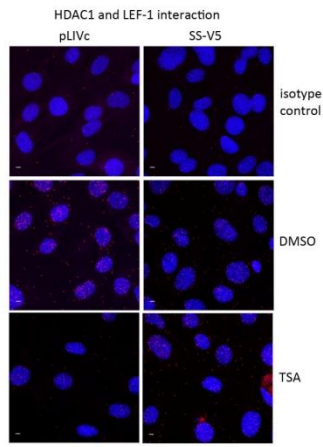

D

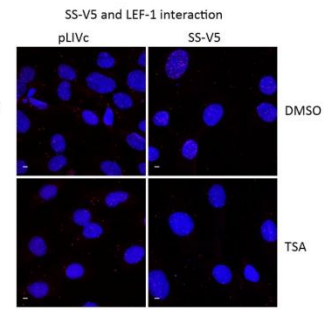

**Table S1. Lists of the probesets that are differentially expressed In C3H10T1/2 infected with SS18-SSX1 or an empty vector, with mean fold change > 2.**

| <b>List of genes induced by SS18-SSX1 expression in C3H10T1/2</b> |                |                    |                                                                   |               |
|-------------------------------------------------------------------|----------------|--------------------|-------------------------------------------------------------------|---------------|
| <b>probeset</b>                                                   | <b>gene id</b> | <b>gene symbol</b> | <b>gene name</b>                                                  | <b>log FC</b> |
| 10490913                                                          | 12350          | Car3               | carbonic anhydrase 3                                              | 5.57825       |
| 10349147                                                          | 116872         | Serpinb7           | serine (or cysteine) peptidase inhibitor, clade B, member 7       | 4.77078       |
| 10347277                                                          | 16008          | Igfbp2             | insulin-like growth factor binding protein 2                      | 4.29172       |
| 10499545                                                          | 13638          | Efna3              | ephrin A3                                                         | 4.04409       |
| 10469457                                                          | 67448          | Plxdc2             | plexin domain containing 2                                        | 3.90492       |
| 10538802                                                          | 68169          | A930038C07Rik      | RIKEN cDNA A930038C07 gene                                        | 3.79029       |
| 10474064                                                          | 277414         | Trp53i11           | transformation related protein 53 inducible protein 11            | 3.77193       |
| 10511363                                                          | 18619          | Penk               | preproenkephalin                                                  | 3.683         |
| 10372503                                                          | 14160          | Lgr5               | leucine rich repeat containing G protein coupled receptor 5       | 3.62925       |
| 10474129                                                          | 210622         | Pamr1              | peptidase domain containing associated with muscle regeneration 1 | 3.60038       |
| 10375175                                                          | 20564          | Slit3              | slit homolog 3 (Drosophila)                                       | 3.57393       |
| 10380622                                                          | 15417          | Hoxb9              | homeobox B9                                                       | 3.55726       |
| 10454632                                                          | 12326          | Camk4              | calcium/calmodulin-dependent protein kinase IV                    | 3.51227       |
| 10389929                                                          | 12291          | Cacna1g            | calcium channel, voltage-dependent, T type, alpha 1G subunit      | 3.50484       |
| 10584549                                                          | 235281         | Scn3b              | sodium channel, voltage-gated, type III, beta                     | 3.35744       |
| 10458999                                                          | 14119          | Fbn2               | fibrillin 2                                                       | 3.23883       |
| 10372139                                                          | 67405          | Nts                | neurotensin                                                       | 3.19329       |
| 10385036                                                          | 14172          | Fgf18              | fibroblast growth factor 18                                       | 3.16813       |
| 10603151                                                          | 14758          | Gpm6b              | glycoprotein m6b                                                  | 3.06302       |
| 10517587                                                          | 11647          | Alpl               | alkaline phosphatase, liver/bone/kidney                           | 3.06103       |
| 10381096                                                          | 16010          | Igfbp4             | insulin-like growth factor binding protein 4                      | 3.02654       |
| 10436304                                                          | 320712         | Abi3bp             | ABI gene family, member 3 (NESH) binding protein                  | 3.0209        |
| 10459335                                                          | 225617         | -                  | -                                                                 | 2.97614       |
| 10398319                                                          | 13386          | Dlk1               | delta-like 1 homolog (Drosophila)                                 | 2.94625       |
| 10400006                                                          | 11622          | Ahr                | aryl-hydrocarbon receptor                                         | 2.85067       |
| 10481272                                                          | 69327          | 1700007K13Rik      | RIKEN cDNA 1700007K13 gene                                        | 2.83457       |
| 10544610                                                          | 140488         | Igf2bp3            | insulin-like growth factor 2 mRNA binding protein 3               | 2.80732       |
| 10569344                                                          | 16002          | Igf2               | insulin-like growth factor 2                                      | 2.79116       |
| 10443276                                                          | 268935         | Scube3             | signal peptide, CUB domain, EGF-like 3                            | 2.77638       |
| 10579894                                                          | 15245          | Hhip               | Hedgehog-interacting protein                                      | 2.77222       |
| 10407435                                                          | 105349         | Akr1c18            | aldo-keto reductase family 1, member C18                          | 2.71987       |
| 10485745                                                          | 228432         | Ano3               | anoctamin 3                                                       | 2.68587       |
| 10353192                                                          | 14048          | Eya1               | eyes absent 1 homolog (Drosophila)                                | 2.62234       |
| 10424676                                                          | 17069          | Ly6e               | lymphocyte antigen 6 complex, locus E                             | 2.62013       |
| 10459353                                                          | -              | -                  | -                                                                 | 2.5883        |
| 10464400                                                          | 107376         | E330013P04Rik      | RIKEN cDNA E330013P04 gene                                        | 2.53064       |



|          |        |               |                                                                           |         |
|----------|--------|---------------|---------------------------------------------------------------------------|---------|
| 10405058 | 27047  | Omd           | osteomodulin                                                              | 2.53037 |
| 10338799 | -      | -             | -                                                                         | 2.50527 |
| 10511429 | 12319  | Car8          | carbonic anhydrase 8                                                      | 2.4992  |
| 10601848 | 76219  | 6530401D17Rik | RIKEN cDNA 6530401D17 gene                                                | 2.49538 |
| 10435948 | 67896  | Ccdc80        | coiled-coil domain containing 80                                          | 2.48428 |
| 10583809 | 12797  | Cnn1          | calponin 1                                                                | 2.48047 |
| 10427272 | 15421  | Hoxc12        | homeobox C12                                                              | 2.47638 |
| 10569335 | 14955  | H19           | H19 fetal liver mRNA                                                      | 2.47534 |
| 10601846 | -      | -             | -                                                                         | 2.46741 |
| 10380629 | -      | -             | -                                                                         | 2.46304 |
| 10491721 | 24063  | Spry1         | sprouty homolog 1 (Drosophila)                                            | 2.45897 |
| 10423080 | 81799  | C1qtnf3       | C1q and tumor necrosis factor related protein 3                           | 2.44241 |
| 10349947 | 14264  | Fmod          | fibromodulin                                                              | 2.4281  |
| 10341818 | -      | -             | -                                                                         | 2.40982 |
| 10549041 | 108096 | Slco1a5       | solute carrier organic anion transporter family, member 1a5               | 2.38574 |
| 10427268 | 15422  | Hoxc13        | homeobox C13                                                              | 2.37894 |
| 10587880 | 76477  | Pcolce2       | procollagen C-endopeptidase enhancer 2                                    | 2.37678 |
| 10587616 | 244954 | Prss35        | protease, serine, 35                                                      | 2.35759 |
| 10397551 | -      | -             | -                                                                         | 2.35736 |
| 10339978 | -      | -             | -                                                                         | 2.35453 |
| 10384223 | 16009  | Igfbp3        | insulin-like growth factor binding protein 3                              | 2.35305 |
| 10526968 | 243312 | Elfn1         | leucine rich repeat and fibronectin type III, extracellular 1             | 2.33758 |
| 10553967 | 18553  | Pcsk6         | proprotein convertase subtilisin/kexin type 6                             | 2.31955 |
| 10393662 | 18164  | Nptx1         | neuronal pentraxin 1                                                      | 2.31446 |
| 10358533 | 545370 | Hmcn1         | hemicentin 1                                                              | 2.29641 |
| 10459363 | 667742 | Fam38b        | family with sequence similarity 38, member B                              | 2.27847 |
| 10499932 | 67718  | Lce1h         | late cornified envelope 1H                                                | 2.26413 |
| 10414065 | 11752  | Anxa8         | annexin A8                                                                | 2.25657 |
| 10414900 | -      | -             | -                                                                         | 2.2561  |
| 10414790 | -      | -             | -                                                                         | 2.2561  |
| 10438730 | 20604  | Sst           | somatostatin                                                              | 2.25167 |
| 10424691 | 17071  | Ly6f          | lymphocyte antigen 6 complex, locus F                                     | 2.23462 |
| 10532741 | 231633 | Tmem119       | transmembrane protein 119                                                 | 2.22945 |
| 10338782 | -      | -             | -                                                                         | 2.22362 |
| 10537062 | 17294  | Mest          | mesoderm specific transcript                                              | 2.21924 |
| 10558150 | 56213  | Htra1         | HtrA serine peptidase 1                                                   | 2.20184 |
| 10511631 | 208890 | Slc26a7       | solute carrier family 26, member 7                                        | 2.18341 |
| 10396270 | 59036  | Dact1         | dapper homolog 1, antagonist of beta-catenin (xenopus)                    | 2.18066 |
| 10415396 | 73181  | Nfatc4        | nuclear factor of activated T-cells, cytoplasmic, calcineurin-dependent 4 | 2.16905 |
| 10573779 | 93960  | Nkd1          | naked cuticle 1 homolog (Drosophila)                                      | 2.16042 |
| 10484463 | 12258  | Serping1      | serine (or cysteine) peptidase inhibitor, clade G, member 1               | 2.13513 |
| 10357833 | 381290 | Atp2b4        | ATPase, Ca <sup>++</sup> transporting, plasma membrane 4                  | 2.13238 |
| 10343914 | -      | -             | -                                                                         | 2.11447 |
| 10607646 | 195727 | Nhs           | Nance-Horan syndrome (human)                                              | 2.10223 |

|          |        |               |                                                                                        |         |
|----------|--------|---------------|----------------------------------------------------------------------------------------|---------|
| 10365682 | -      | -             | -                                                                                      | 2.08588 |
| 10521471 | 269643 | Ppp2r2c       | protein phosphatase 2 (formerly 2A), regulatory subunit B (PR 52), gamma isoform       | 2.08197 |
| 10398996 | 68337  | Crip2         | cysteine rich protein 2                                                                | 2.07443 |
| 10492798 | 20319  | Sfrp2         | secreted frizzled-related protein 2                                                    | 2.0717  |
| 10358476 | 96875  | Prg4          | proteoglycan 4 (megakaryocyte stimulating factor, articular superficial zone protein)  | 2.06102 |
| 10427293 | 15425  | Hoxc6         | homeobox C6                                                                            | 2.05759 |
| 10507152 | 13118  | Cyp4a12b      | cytochrome P450, family 4, subfamily a, polypeptide 12B                                | 2.04497 |
| 10358577 | 545370 | Hmcn1         | hemicentin 1                                                                           | 2.03212 |
| 10462442 | 77125  | Il33          | interleukin 33                                                                         | 2.03047 |
| 10576332 | 22152  | Tubb3         | tubulin, beta 3                                                                        | 2.00106 |
| 10366180 | -      | -             | -                                                                                      | 1.99858 |
| 10586079 | 319480 | Itga11        | integrin alpha 11                                                                      | 1.99837 |
| 10458828 | 12583  | Cdo1          | cysteine dioxygenase 1, cytosolic                                                      | 1.99134 |
| 10409579 | 57266  | Cxcl14        | chemokine (C-X-C motif) ligand 14                                                      | 1.99079 |
| 10358535 | 545370 | Hmcn1         | hemicentin 1                                                                           | 1.98575 |
| 10428857 | 211401 | Mtss1         | metastasis suppressor 1                                                                | 1.98486 |
| 10585803 | 20897  | Stra6         | stimulated by retinoic acid gene 6                                                     | 1.98344 |
| 10481518 | 64292  | Ptges         | prostaglandin E synthase                                                               | 1.98125 |
| 10422059 | 239217 | Kctd12        | potassium channel tetramerisation domain containing 12                                 | 1.97924 |
| 10390175 | 18053  | Ngfr          | nerve growth factor receptor (TNFR superfamily, member 16)                             | 1.9735  |
| 10342271 | -      | -             | -                                                                                      | 1.9735  |
| 10521759 | 20563  | Slit2         | slit homolog 2 (Drosophila)                                                            | 1.97246 |
| 10356172 | 98496  | Pid1          | phosphotyrosine interaction domain containing 1                                        | 1.97121 |
| 10559978 | -      | -             | -                                                                                      | 1.96843 |
| 10478415 | 22403  | Wisp2         | WNT1 inducible signaling pathway protein 2                                             | 1.96102 |
| 10492448 | 19288  | Ptx3          | pentraxin related gene                                                                 | 1.9552  |
| 10577164 | 14456  | Gas6          | growth arrest specific 6                                                               | 1.95186 |
| 10519886 | 20348  | Sema3c        | sema domain, immunoglobulin domain (Ig), short basic domain, secreted, (semaphorin) 3C | 1.94387 |
| 10427035 | 15370  | Nr4a1         | nuclear receptor subfamily 4, group A, member 1                                        | 1.94362 |
| 10488709 | 329540 | 8430427H17Rik | RIKEN cDNA 8430427H17 gene                                                             | 1.93379 |
| 10425945 | 14114  | Fbln1         | fibulin 1                                                                              | 1.92676 |
| 10340901 | -      | -             | -                                                                                      | 1.92636 |
| 10516735 | 94242  | Tinagl1       | tubulointerstitial nephritis antigen-like 1                                            | 1.92492 |
| 10424119 | 18133  | Nov           | nephroblastoma overexpressed gene                                                      | 1.92295 |
| 10576049 | 15227  | Foxf1a        | forkhead box F1a                                                                       | 1.92019 |
| 10441093 | 13876  | Erg           | avian erythroblastosis virus E-26 (v-ets) oncogene related                             | 1.90836 |
| 10505954 | 21687  | Tek           | endothelial-specific receptor tyrosine kinase                                          | 1.90178 |
| 10440091 | 12837  | Col8a1        | collagen, type VIII, alpha 1                                                           | 1.89407 |
| 10556297 | 11535  | Adm           | adrenomedullin                                                                         | 1.89252 |
| 10438769 | 12737  | Cldn1         | claudin 1                                                                              | 1.88756 |
| 10419015 | 170677 | Cdhr1         | cadherin-related family member 1                                                       | 1.88604 |
| 10358561 | 545370 | Hmcn1         | hemicentin 1                                                                           | 1.88316 |
| 10462035 | 16832  | Ldhb          | lactate dehydrogenase B                                                                | 1.87813 |

|          |        |               |                                                             |         |
|----------|--------|---------------|-------------------------------------------------------------|---------|
| 10454601 | 53603  | Tslp          | thymic stromal lymphopoietin                                | 1.87677 |
| 10523190 | 231440 | Parm1         | prostate androgen-regulated mucin-like protein 1            | 1.86267 |
| 10428376 | 11600  | Angpt1        | angiopoietin 1                                              | 1.86111 |
| 10443786 | 18585  | Pde9a         | phosphodiesterase 9A                                        | 1.86008 |
| 10606366 | 213436 | Zcchc5        | zinc finger, CCHC domain containing 5                       | 1.85571 |
| 10488060 | 16449  | Jag1          | jagged 1                                                    | 1.85444 |
| 10365559 | 16000  | Igf1          | insulin-like growth factor 1                                | 1.84559 |
| 10363541 | -      | -             | -                                                           | 1.84003 |
| 10471154 | -      | -             | -                                                           | 1.83615 |
| 10342166 | -      | -             | -                                                           | 1.8343  |
| 10478048 | 16803  | Lbp           | lipopolysaccharide binding protein                          | 1.82958 |
| 10339413 | -      | -             | -                                                           | 1.82767 |
| 10605181 | 19703  | Renbp         | renin binding protein                                       | 1.82505 |
| 10562761 | 20256  | Clec11a       | C-type lectin domain family 11, member a                    | 1.82125 |
| 10462623 | 15957  | Ifit1         | interferon-induced protein with tetratricopeptide repeats 1 | 1.81952 |
| 10563812 | -      | -             | -                                                           | 1.81257 |
| 10563810 | -      | -             | -                                                           | 1.81257 |
| 10563808 | 668774 | Gm9350        | predicted gene 9350                                         | 1.81257 |
| 10563806 | -      | -             | -                                                           | 1.81257 |
| 10563804 | -      | -             | -                                                           | 1.81257 |
| 10563802 | -      | -             | -                                                           | 1.81257 |
| 10513722 | 326623 | Tnfsf15       | tumor necrosis factor (ligand) superfamily, member 15       | 1.80512 |
| 10391103 | 16480  | Jup           | junction plakoglobin                                        | 1.80319 |
| 10591853 | 57246  | Tbx20         | T-box 20                                                    | 1.78779 |
| 10342070 | -      | -             | -                                                           | 1.78764 |
| 10361926 | 26408  | Map3k5        | mitogen-activated protein kinase kinase kinase 5            | 1.78707 |
| 10549972 | -      | -             | -                                                           | 1.78563 |
| 10530536 | 21682  | Tec           | tec protein tyrosine kinase                                 | 1.77261 |
| 10485198 | 241556 | Tspan18       | tetraspanin 18                                              | 1.76779 |
| 10549097 | 16832  | Ldhb          | lactate dehydrogenase B                                     | 1.76542 |
| 10341468 | -      | -             | -                                                           | 1.75907 |
| 10357965 | 329252 | Lgr6          | leucine-rich repeat-containing G protein-coupled receptor 6 | 1.75322 |
| 10459633 | 75577  | 2310002L13Rik | RIKEN cDNA 2310002L13 gene                                  | 1.74823 |
| 10588691 | -      | -             | -                                                           | 1.73055 |
| 10341054 | -      | -             | -                                                           | 1.72963 |
| 10344144 | -      | -             | -                                                           | 1.72486 |
| 10490923 | 12349  | Car2          | carbonic anhydrase 2                                        | 1.7244  |
| 10358633 | 545370 | Hmcn1         | hemicentin 1                                                | 1.71976 |
| 10485718 | 228432 | Ano3          | anoctamin 3                                                 | 1.71807 |
| 10549964 | -      | -             | -                                                           | 1.71697 |
| 10424105 | 239447 | Colec10       | collectin sub-family member 10                              | 1.71657 |
| 10521498 | 12933  | Crmp1         | collapsin response mediator protein 1                       | 1.71638 |
| 10339432 | -      | -             | -                                                           | 1.71151 |
| 10355893 | 13838  | Epha4         | Eph receptor A4                                             | 1.70618 |
| 10535559 | 66898  | Baiap211      | BAI1-associated protein 2-like 1                            | 1.70389 |

|          |        |               |                                                                                               |         |
|----------|--------|---------------|-----------------------------------------------------------------------------------------------|---------|
| 10342239 | -      | -             | -                                                                                             | 1.69903 |
| 10352143 | 269152 | Kif26b        | kinesin family member 26B                                                                     | 1.69625 |
| 10468722 | 14585  | Gfra1         | glial cell line derived neurotrophic factor family receptor alpha 1                           | 1.69623 |
| 10405063 | 18295  | Ogn           | osteoglycin                                                                                   | 1.68849 |
| 10459084 | 104027 | Synpo         | synaptopodin                                                                                  | 1.68648 |
| 10338946 | -      | -             | -                                                                                             | 1.68529 |
| 10338786 | -      | -             | -                                                                                             | 1.68269 |
| 10340803 | -      | -             | -                                                                                             | 1.68182 |
| 10548879 | 17313  | Mgp           | matrix Gla protein                                                                            | 1.68126 |
| 10429515 | 23936  | Lynx1         | Ly6/neurotoxin 1                                                                              | 1.67884 |
| 10578572 | 71069  | Stox2         | storkhead box 2                                                                               | 1.66546 |
| 10363735 | 13654  | Egr2          | early growth response 2                                                                       | 1.66473 |
| 10340383 | -      | -             | -                                                                                             | 1.6632  |
| 10341435 | -      | -             | -                                                                                             | 1.6624  |
| 10343764 | -      | -             | -                                                                                             | 1.66103 |
| 10351099 | 240873 | Tnfsf18       | tumor necrosis factor (ligand) superfamily, member 18                                         | 1.64629 |
| 10417176 | 22772  | Zic2          | zinc finger protein of the cerebellum 2                                                       | 1.64556 |
| 10568873 | 11501  | Adam8         | a disintegrin and metallopeptidase domain 8                                                   | 1.63898 |
| 10382228 | 12006  | Axin2         | axin2                                                                                         | 1.63864 |
| 10465619 | 396184 | Flrt1         | fibronectin leucine rich transmembrane protein 1                                              | 1.6348  |
| 10499766 | 26568  | Slc27a3       | solute carrier family 27 (fatty acid transporter), member 3                                   | 1.6337  |
| 10397346 | 14281  | Fos           | FBJ osteosarcoma oncogene                                                                     | 1.63193 |
| 10547740 | 50908  | C1s           | complement component 1, s subcomponent                                                        | 1.63069 |
| 10341414 | -      | -             | -                                                                                             | 1.63068 |
| 10449258 | 14570  | Arhgdig       | Rho GDP dissociation inhibitor (GDI) gamma                                                    | 1.62946 |
| 10520452 | 16193  | Il6           | interleukin 6                                                                                 | 1.62842 |
| 10341654 | -      | -             | -                                                                                             | 1.62821 |
| 10344553 | -      | -             | -                                                                                             | 1.62449 |
| 10358527 | 545370 | Hmcn1         | hemicentin 1                                                                                  | 1.61779 |
| 10360920 | 21808  | Tgfb2         | transforming growth factor, beta 2                                                            | 1.61308 |
| 10489759 | 72043  | Sulf2         | sulfatase 2                                                                                   | 1.61219 |
| 10431935 | 105827 | Amigo2        | adhesion molecule with Ig like domain 2                                                       | 1.60802 |
| 10408629 | 66895  | 1300014I06Rik | RIKEN cDNA 1300014I06 gene                                                                    | 1.59456 |
| 10546450 | 101401 | Adamts9       | a disintegrin-like and metallopeptidase (reprolysin type) with thrombospondin type 1 motif, 9 | 1.59358 |
| 10404479 | -      | -             | -                                                                                             | 1.58762 |
| 10532784 | 68666  | Svop          | SV2 related protein                                                                           | 1.58455 |
| 10431812 | 54003  | Nell2         | NEL-like 2 (chicken)                                                                          | 1.58439 |
| 10343781 | -      | -             | -                                                                                             | 1.58426 |
| 10451372 | 71461  | Ptk7          | PTK7 protein tyrosine kinase 7                                                                | 1.58367 |
| 10358583 | 545370 | Hmcn1         | hemicentin 1                                                                                  | 1.58071 |
| 10344275 | -      | -             | -                                                                                             | 1.5806  |
| 10339952 | -      | -             | -                                                                                             | 1.57763 |
| 10489569 | -      | -             | -                                                                                             | 1.57378 |
| 10339691 | -      | -             | -                                                                                             | 1.57139 |

|          |        |           |                                                                                               |         |
|----------|--------|-----------|-----------------------------------------------------------------------------------------------|---------|
| 10339442 | -      | -         | -                                                                                             | 1.56069 |
| 10343305 | -      | -         | -                                                                                             | 1.55821 |
| 10447602 | 22350  | Ezr       | ezrin                                                                                         | 1.55677 |
| 10485402 | 14221  | Fjx1      | four jointed box 1 (Drosophila)                                                               | 1.54988 |
| 10464917 | 12794  | Cnih2     | cornichon homolog 2 (Drosophila)                                                              | 1.54701 |
| 10373218 | 104080 | Nxph4     | neurexophilin 4                                                                               | 1.54598 |
| 10427286 | 15427  | Hoxc9     | homeobox C9                                                                                   | 1.54086 |
| 10357339 | -      | -         | -                                                                                             | 1.53856 |
| 10344250 | -      | -         | -                                                                                             | 1.53719 |
| 10534343 | 13717  | Eln       | elastin                                                                                       | 1.53506 |
| 10342279 | -      | -         | -                                                                                             | 1.52978 |
| 10406845 | 15229  | Foxd1     | forkhead box D1                                                                               | 1.52948 |
| 10342449 | -      | -         | -                                                                                             | 1.5278  |
| 10340493 | -      | -         | -                                                                                             | 1.52764 |
| 10446763 | 77889  | Lbh       | limb-bud and heart                                                                            | 1.52721 |
| 10399470 | 217410 | Trib2     | tribbles homolog 2 (Drosophila)                                                               | 1.5269  |
| 10541678 | 50909  | C1ra      | complement component 1, r subcomponent A                                                      | 1.52405 |
| 10340801 | -      | -         | -                                                                                             | 1.52384 |
| 10340631 | -      | -         | -                                                                                             | 1.52233 |
| 10541307 | 24110  | Usp18     | ubiquitin specific peptidase 18                                                               | 1.51887 |
| 10578649 | 23965  | Odz3      | odd Oz/ten-m homolog 3 (Drosophila)                                                           | 1.51779 |
| 10405693 | 69635  | Dapk1     | death associated protein kinase 1                                                             | 1.51258 |
| 10541683 | -      | -         | -                                                                                             | 1.51245 |
| 10499924 | 68694  | Lce1e     | late cornified envelope 1E                                                                    | 1.5082  |
| 10546432 | 101401 | Adams9    | a disintegrin-like and metallopeptidase (reprolysin type) with thrombospondin type 1 motif, 9 | 1.50636 |
| 10375578 | 14257  | Flt4      | FMS-like tyrosine kinase 4                                                                    | 1.50512 |
| 10402808 | 16450  | Jag2      | jagged 2                                                                                      | 1.50483 |
| 10343835 | -      | -         | -                                                                                             | 1.50195 |
| 10339289 | -      | -         | -                                                                                             | 1.49969 |
| 10388254 | 11484  | Aspa      | aspartoacylase                                                                                | 1.49375 |
| 10404053 | 68024  | Hist1h2bc | histone cluster 1, H2bc                                                                       | 1.49275 |
| 10436788 | 26559  | Hunk      | hormonally upregulated Neu-associated kinase                                                  | 1.49107 |
| 10366153 | 237504 | Rassf9    | Ras association (RalGDS/AF-6) domain family (N-terminal) member 9                             | 1.48862 |
| 10341214 | -      | -         | -                                                                                             | 1.48795 |
| 10576046 | 15227  | Foxf1a    | forkhead box F1a                                                                              | 1.4874  |
| 10448676 | 65962  | Slc9a3r2  | solute carrier family 9 (sodium/hydrogen exchanger), member 3 regulator 2                     | 1.48137 |
| 10548996 | 28250  | Slco1a4   | solute carrier organic anion transporter family, member 1a4                                   | 1.48092 |
| 10373179 | 14632  | Gli1      | GLI-Kruppel family member GLI1                                                                | 1.47555 |
| 10490129 | 12162  | Bmp7      | bone morphogenetic protein 7                                                                  | 1.47538 |
| 10427290 | 15426  | Hoxc8     | homeobox C8                                                                                   | 1.4727  |
| 10342300 | -      | -         | -                                                                                             | 1.47124 |
| 10462281 | 22359  | Vldlr     | very low density lipoprotein receptor                                                         | 1.47096 |
| 10338945 | -      | -         | -                                                                                             | 1.46942 |

|          |        |          |                                                                                                |         |
|----------|--------|----------|------------------------------------------------------------------------------------------------|---------|
| 10447056 | 70536  | Qpct     | glutaminy-peptide cyclotransferase (glutaminy cyclase)                                         | 1.46841 |
| 10338948 | -      | -        | -                                                                                              | 1.46526 |
| 10339995 | -      | -        | -                                                                                              | 1.45979 |
| 10404464 | -      | -        | -                                                                                              | 1.45943 |
| 10344075 | -      | -        | -                                                                                              | 1.45889 |
| 10539894 | 23945  | Mgll     | monoglyceride lipase                                                                           | 1.45773 |
| 10350733 | 19734  | Rgs16    | regulator of G-protein signaling 16                                                            | 1.4564  |
| 10342610 | -      | -        | -                                                                                              | 1.45265 |
| 10362138 | 22361  | Vnn1     | vanin 1                                                                                        | 1.44904 |
| 10357986 | 13924  | Ptpv     | protein tyrosine phosphatase, receptor type, V                                                 | 1.44489 |
| 10546454 | 101401 | Adams9   | a disintegrin-like and metalloproteinase (reprolysin type) with thrombospondin type 1 motif, 9 | 1.44144 |
| 10449608 | 74762  | Mdga1    | MAM domain containing glycosylphosphatidylinositol anchor 1                                    | 1.43945 |
| 10373918 | 16878  | Lif      | leukemia inhibitory factor                                                                     | 1.43706 |
| 10453178 | 225028 | Map4k3   | mitogen-activated protein kinase kinase kinase kinase 3                                        | 1.42643 |
| 10416181 | 20855  | Stc1     | stanniocalcin 1                                                                                | 1.42317 |
| 10458046 | 27528  | D0H4S114 | DNA segment, human D4S114                                                                      | 1.42191 |
| 10449775 | 18131  | Notch3   | Notch gene homolog 3 (Drosophila)                                                              | 1.4217  |
| 10343174 | -      | -        | -                                                                                              | 1.41386 |
| 10537227 | -      | -        | -                                                                                              | 1.40929 |
| 10361771 | 22634  | Plagl1   | pleiomorphic adenoma gene-like 1                                                               | 1.40783 |
| 10536294 | 170676 | Peg10    | paternally expressed 10                                                                        | 1.40707 |
| 10571467 | 68797  | Pdgfrl   | platelet-derived growth factor receptor-like                                                   | 1.40507 |
| 10339863 | -      | -        | -                                                                                              | 1.40471 |
| 10399973 | 79221  | Hdac9    | histone deacetylase 9                                                                          | 1.40407 |
| 10422822 | 16880  | Lifr     | leukemia inhibitory factor receptor                                                            | 1.39872 |
| 10384233 | 319939 | Tns3     | tensin 3                                                                                       | 1.39831 |
| 10585214 | -      | -        | -                                                                                              | 1.39815 |
| 10339059 | -      | -        | -                                                                                              | 1.39242 |
| 10401831 | 435337 | Gm5662   | predicted gene 5662                                                                            | 1.39063 |
| 10341955 | -      | -        | -                                                                                              | 1.3896  |
| 10535174 | 231832 | Tmem184a | transmembrane protein 184a                                                                     | 1.38679 |
| 10370798 | 66548  | Adamts15 | ADAMTS-like 5                                                                                  | 1.38466 |
| 10339842 | -      | -        | -                                                                                              | 1.38321 |
| 10594044 | 26968  | Islr     | immunoglobulin superfamily containing leucine-rich repeat                                      | 1.38232 |
| 10490384 | 16776  | Lama5    | laminin, alpha 5                                                                               | 1.38119 |
| 10343514 | -      | -        | -                                                                                              | 1.37943 |
| 10344952 | 98711  | Rdh10    | retinol dehydrogenase 10 (all-trans)                                                           | 1.3792  |
| 10338884 | -      | -        | -                                                                                              | 1.37545 |
| 10346843 | 18187  | Nrp2     | neuropilin 2                                                                                   | 1.37317 |
| 10343119 | -      | -        | -                                                                                              | 1.37128 |
| 10342856 | -      | -        | -                                                                                              | 1.36911 |
| 10351623 | 16456  | F11r     | F11 receptor                                                                                   | 1.36764 |
| 10342367 | -      | -        | -                                                                                              | 1.36735 |
| 10338455 | -      | -        | -                                                                                              | 1.35841 |

|          |        |             |                                                                         |         |
|----------|--------|-------------|-------------------------------------------------------------------------|---------|
| 10343972 | -      | -           | -                                                                       | 1.35799 |
| 10540523 | 30937  | Lmcd1       | LIM and cysteine-rich domains 1                                         | 1.35788 |
| 10555174 | 434215 | Lrrc32      | leucine rich repeat containing 32                                       | 1.35747 |
| 10416023 | 71145  | Scara5      | scavenger receptor class A, member 5 (putative)                         | 1.35646 |
| 10343327 | -      | -           | -                                                                       | 1.35535 |
| 10401673 | 21809  | Tgfb3       | transforming growth factor, beta 3                                      | 1.355   |
| 10584165 | 67703  | Kirrel3     | kin of IRRE like 3 (Drosophila)                                         | 1.35424 |
| 10564624 | 20450  | St8sia2     | ST8 alpha-N-acetyl-neuraminide alpha-2,8-sialyltransferase 2            | 1.34637 |
| 10338643 | -      | -           | -                                                                       | 1.34499 |
| 10359571 | 14261  | Fmo1        | flavin containing monooxygenase 1                                       | 1.343   |
| 10566583 | 668139 | Gm8995      | predicted gene 8995                                                     | 1.34277 |
| 10410547 | 72293  | Nkd2        | naked cuticle 2 homolog (Drosophila)                                    | 1.34232 |
| 10508614 | 14077  | Fabp3       | fatty acid binding protein 3, muscle and heart                          | 1.34222 |
| 10463476 | 107250 | Kazald1     | Kazal-type serine peptidase inhibitor domain 1                          | 1.34161 |
| 10341382 | -      | -           | -                                                                       | 1.34005 |
| 10551185 | 21803  | Tgfb1       | transforming growth factor, beta 1                                      | 1.33974 |
| 10499952 | 74175  | Crct1       | cysteine-rich C-terminal 1                                              | 1.33808 |
| 10492355 | 17380  | Mme         | membrane metallo endopeptidase                                          | 1.33598 |
| 10343825 | -      | -           | -                                                                       | 1.33535 |
| 10410039 | 19206  | Ptch1       | patched homolog 1                                                       | 1.33435 |
| 10343982 | -      | -           | -                                                                       | 1.33309 |
| 10342998 | -      | -           | -                                                                       | 1.33248 |
| 10361887 | 64058  | Perp        | PERP, TP53 apoptosis effector                                           | 1.33089 |
| 10512279 | 12804  | Cntfr       | ciliary neurotrophic factor receptor                                    | 1.32978 |
| 10420362 | -      | -           | -                                                                       | 1.32874 |
| 10405587 | 21810  | Tgfb1       | transforming growth factor, beta induced                                | 1.32778 |
| 10344571 | -      | -           | -                                                                       | 1.32698 |
| 10467766 | 67573  | Loxl4       | lysyl oxidase-like 4                                                    | 1.32265 |
| 10521796 | -      | -           | -                                                                       | 1.31867 |
| 10351455 | 19737  | Rgs5        | regulator of G-protein signaling 5                                      | 1.31646 |
| 10398412 | -      | -           | -                                                                       | 1.31641 |
| 10540472 | 20893  | Bhlhe40     | basic helix-loop-helix family, member e40                               | 1.3154  |
| 10476740 | 94249  | Slc24a3     | solute carrier family 24 (sodium/potassium/calcium exchanger), member 3 | 1.31408 |
| 10339951 | -      | -           | -                                                                       | 1.31038 |
| 10344566 | -      | -           | -                                                                       | 1.31018 |
| 10512022 | 214944 | Mobkl2b     | MOB1, Mps One Binder kinase activator-like 2B (yeast)                   | 1.30704 |
| 10470529 | 56177  | Olfm1       | olfactomedin 1                                                          | 1.30317 |
| 10385770 | 257871 | Olf1372-ps1 | olfactory receptor 1372, pseudogene 1                                   | 1.30142 |
| 10355984 | 20720  | Serpine2    | serine (or cysteine) peptidase inhibitor, clade E, member 2             | 1.3014  |
| 10365974 | 13179  | Dcn         | decorin                                                                 | 1.30046 |
| 10460541 | 70445  | Cd248       | CD248 antigen, endosialin                                               | 1.29905 |
| 10514347 | 12579  | Cdkn2b      | cyclin-dependent kinase inhibitor 2B (p15, inhibits CDK4)               | 1.29754 |
| 10342527 | -      | -           | -                                                                       | 1.29275 |
| 10512949 | 11303  | Abca1       | ATP-binding cassette, sub-family A (ABC1), member 1                     | 1.29255 |

|          |           |          |                                                                                |         |
|----------|-----------|----------|--------------------------------------------------------------------------------|---------|
| 10344981 | 94227     | Pi15     | peptidase inhibitor 15                                                         | 1.29225 |
| 10528227 | 14677     | Gnai1    | guanine nucleotide binding protein (G protein), alpha inhibiting 1             | 1.29076 |
| 10405781 | -         | -        | -                                                                              | 1.29062 |
| 10409464 | 56320     | Dbn1     | drebrin 1                                                                      | 1.29041 |
| 10549420 | 387314    | Tmtc1    | transmembrane and tetratricopeptide repeat containing 1                        | 1.28882 |
| 10344453 | -         | -        | -                                                                              | 1.28809 |
| 10357875 | 12227     | Btg2     | B-cell translocation gene 2, anti-proliferative                                | 1.2878  |
| 10434925 | 15205     | Hes1     | hairy and enhancer of split 1 (Drosophila)                                     | 1.2857  |
| 10414025 | 14560     | Gdf10    | growth differentiation factor 10                                               | 1.28355 |
| 10339310 | -         | -        | -                                                                              | 1.28271 |
| 10404472 | -         | -        | -                                                                              | 1.28202 |
| 10424686 | 223631    | BC025446 | cDNA sequence BC025446                                                         | 1.28185 |
| 10413482 | 22418     | Wnt5a    | wingless-related MMTV integration site 5A                                      | 1.2806  |
| 10502081 | 13809     | Enpep    | glutamyl aminopeptidase                                                        | 1.27935 |
| 10433445 | 268860    | Abat     | 4-aminobutyrate aminotransferase                                               | 1.27519 |
| 10405047 | 66695     | Aspn     | asporin                                                                        | 1.27207 |
| 10513008 | 16600     | Klf4     | Kruppel-like factor 4 (gut)                                                    | 1.27197 |
| 10435961 | 100038470 | Gm10808  | predicted gene 10808                                                           | 1.27102 |
| 10366266 | 114774    | Pawr     | PRKC, apoptosis, WT1, regulator                                                | 1.26803 |
| 10341019 | -         | -        | -                                                                              | 1.26633 |
| 10496373 | 73284     | Ddit4l   | DNA-damage-inducible transcript 4-like                                         | 1.25999 |
| 10548030 | 12527     | Cd9      | CD9 antigen                                                                    | 1.25882 |
| 10494003 | 399674    | Tdpoz3   | TD and POZ domain containing 3                                                 | 1.25727 |
| 10358549 | 545370    | Hmcn1    | hemicentin 1                                                                   | 1.25644 |
| 10343185 | -         | -        | -                                                                              | 1.25639 |
| 10402473 | 94040     | Clmn     | calmin                                                                         | 1.25463 |
| 10536025 | -         | -        | -                                                                              | 1.25131 |
| 10523337 | -         | -        | -                                                                              | 1.25131 |
| 10342888 | -         | -        | -                                                                              | 1.24935 |
| 10343694 | -         | -        | -                                                                              | 1.24254 |
| 10505914 | 236537    | Zfp352   | zinc finger protein 352                                                        | 1.24166 |
| 10374777 | 216616    | Efemp1   | epidermal growth factor-containing fibulin-like extracellular matrix protein 1 | 1.23749 |
| 10599174 | 16164     | Il13ra1  | interleukin 13 receptor, alpha 1                                               | 1.2371  |
| 10339159 | -         | -        | -                                                                              | 1.23674 |
| 10339266 | -         | -        | -                                                                              | 1.23527 |
| 10385500 | 15944     | Irgm1    | immunity-related GTPase family M member 1                                      | 1.23281 |
| 10344110 | -         | -        | -                                                                              | 1.23169 |
| 10339417 | -         | -        | -                                                                              | 1.23131 |
| 10521111 | 14184     | Fgfr3    | fibroblast growth factor receptor 3                                            | 1.23013 |
| 10485378 | 72446     | Prr5l    | proline rich 5 like                                                            | 1.22759 |
| 10419261 | 12159     | Bmp4     | bone morphogenetic protein 4                                                   | 1.22727 |
| 10418193 | 211623    | Plac9    | placenta specific 9                                                            | 1.22691 |
| 10339420 | -         | -        | -                                                                              | 1.22596 |
| 10407350 | 14165     | Fgf10    | fibroblast growth factor 10                                                    | 1.2257  |



|          |        |           |                                                                                 |         |
|----------|--------|-----------|---------------------------------------------------------------------------------|---------|
| 10458843 | 20358  | Sema6a    | sema domain, transmembrane domain (TM), and cytoplasmic domain, (semaphorin) 6A | 1.22221 |
| 10338589 | -      | -         | -                                                                               | 1.2172  |
| 10598626 | 21912  | Tspan7    | tetraspanin 7                                                                   | 1.21708 |
| 10341517 | -      | -         | -                                                                               | 1.21577 |
| 10344178 | -      | -         | -                                                                               | 1.2154  |
| 10347491 | 22420  | Wnt6      | wingless-related MMTV integration site 6                                        | 1.2151  |
| 10493449 | 21827  | Thbs3     | thrombospondin 3                                                                | 1.21424 |
| 10338426 | -      | -         | -                                                                               | 1.21352 |
| 10338874 | -      | -         | -                                                                               | 1.20771 |
| 10536143 | 624931 | LOC624931 | similar to D5Erd577e protein                                                    | 1.20613 |
| 10536052 | -      | -         | -                                                                               | 1.20613 |
| 10438753 | 210530 | Leprel1   | leprecan-like 1                                                                 | 1.20542 |
| 10405033 | 407800 | Ecm2      | extracellular matrix protein 2, female organ and adipocyte specific             | 1.20523 |
| 10351463 | 19737  | Rgs5      | regulator of G-protein signaling 5                                              | 1.20186 |
| 10342492 | -      | -         | -                                                                               | 1.20007 |
| 10343472 | -      | -         | -                                                                               | 1.1957  |
| 10404783 | 13614  | Edn1      | endothelin 1                                                                    | 1.19524 |
| 10425880 | 109270 | Prr5      | proline rich 5 (renal)                                                          | 1.19397 |
| 10415319 | 16391  | Irf9      | interferon regulatory factor 9                                                  | 1.19397 |
| 10493108 | 12904  | Crabp2    | cellular retinoic acid binding protein II                                       | 1.19281 |
| 10342685 | -      | -         | -                                                                               | 1.19275 |
| 10344261 | -      | -         | -                                                                               | 1.19248 |
| 10514939 | 242608 | Podn      | podocan                                                                         | 1.18752 |
| 10418205 | 211623 | Plac9     | placenta specific 9                                                             | 1.1872  |
| 10418180 | 211623 | Plac9     | placenta specific 9                                                             | 1.1872  |
| 10404458 | 20710  | Serpib9e  | serine (or cysteine) peptidase inhibitor, clade B, member 9e                    | 1.18714 |
| 10430660 | 18591  | Pdgfb     | platelet derived growth factor, B polypeptide                                   | 1.18409 |
| 10423293 | 17909  | Myo10     | myosin X                                                                        | 1.18333 |
| 10341183 | -      | -         | -                                                                               | 1.18233 |
| 10338113 | -      | -         | -                                                                               | 1.18076 |
| 10527936 | 14362  | Fzd1      | frizzled homolog 1 (Drosophila)                                                 | 1.18047 |
| 10479397 | 18216  | Ntsr1     | neurotensin receptor 1                                                          | 1.17998 |
| 10340061 | -      | -         | -                                                                               | 1.17943 |
| 10597239 | 19228  | Pth1r     | parathyroid hormone 1 receptor                                                  | 1.17789 |
| 10364149 | 20203  | S100b     | S100 protein, beta polypeptide, neural                                          | 1.17717 |
| 10400143 | 217517 | Stxbp6    | syntaxin binding protein 6 (amisyn)                                             | 1.17253 |
| 10338744 | -      | -         | -                                                                               | 1.17019 |
| 10562251 | 20266  | Scn1b     | sodium channel, voltage-gated, type I, beta                                     | 1.16973 |
| 10569102 | 54123  | Irf7      | interferon regulatory factor 7                                                  | 1.16952 |
| 10340935 | -      | -         | -                                                                               | 1.16874 |
| 10566358 | 20128  | Trim30    | tripartite motif-containing 30                                                  | 1.16865 |
| 10342245 | -      | -         | -                                                                               | 1.16787 |
| 10522467 | 68939  | Ras11b    | RAS-like, family 11, member B                                                   | 1.16532 |
| 10343257 | -      | -         | -                                                                               | 1.15993 |

|          |        |         |                                                                                              |         |
|----------|--------|---------|----------------------------------------------------------------------------------------------|---------|
| 10344487 | -      | -       | -                                                                                            | 1.15824 |
| 10571444 | 11988  | Slc7a2  | solute carrier family 7 (cationic amino acid transporter, y+ system), member 2               | 1.1577  |
| 10419578 | 29811  | Ndrp2   | N-myc downstream regulated gene 2                                                            | 1.15579 |
| 10342923 | -      | -       | -                                                                                            | 1.15532 |
| 10342223 | -      | -       | -                                                                                            | 1.15377 |
| 10338425 | -      | -       | -                                                                                            | 1.1528  |
| 10420957 | 19229  | Ptk2b   | PTK2 protein tyrosine kinase 2 beta                                                          | 1.15233 |
| 10565315 | 14085  | Fah     | fumarylacetoacetate hydrolase                                                                | 1.15093 |
| 10339832 | -      | -       | -                                                                                            | 1.15045 |
| 10356084 | 16367  | Irs1    | insulin receptor substrate 1                                                                 | 1.14958 |
| 10500808 | 99543  | Olfml3  | olfactomedin-like 3                                                                          | 1.14897 |
| 10393926 | 67880  | Dcxr    | dicarbonyl L-xylulose reductase                                                              | 1.14862 |
| 10343481 | -      | -       | -                                                                                            | 1.14718 |
| 10398039 | -      | -       | -                                                                                            | 1.14632 |
| 10340718 | -      | -       | -                                                                                            | 1.14437 |
| 10461057 | 104383 | Rcor2   | REST corepressor 2                                                                           | 1.14326 |
| 10343277 | -      | -       | -                                                                                            | 1.14316 |
| 10493798 | 67860  | S100a16 | S100 calcium binding protein A16                                                             | 1.14128 |
| 10389752 | 18121  | Nog     | noggin                                                                                       | 1.13904 |
| 10341796 | -      | -       | -                                                                                            | 1.1384  |
| 10576386 | 69581  | Rhou    | ras homolog gene family, member U                                                            | 1.13661 |
| 10351111 | 474332 | Dnm3os  | dynamamin 3, opposite strand                                                                 | 1.13464 |
| 10344197 | -      | -       | -                                                                                            | 1.13367 |
| 10358670 | 545370 | Hmcn1   | hemicentin 1                                                                                 | 1.1336  |
| 10343436 | -      | -       | -                                                                                            | 1.13353 |
| 10363161 | -      | -       | -                                                                                            | 1.13321 |
| 10455761 | 225518 | Prdm6   | PR domain containing 6                                                                       | 1.12647 |
| 10566205 | 384701 | Dub2a   | deubiquitinating enzyme 2a                                                                   | 1.12449 |
| 10343558 | -      | -       | -                                                                                            | 1.12428 |
| 10366653 | 24117  | Wif1    | Wnt inhibitory factor 1                                                                      | 1.12419 |
| 10568553 | 77590  | Chst15  | carbohydrate (N-acetylgalactosamine 4-sulfate 6-O) sulfotransferase 15                       | 1.12335 |
| 10339433 | -      | -       | -                                                                                            | 1.12272 |
| 10338698 | -      | -       | -                                                                                            | 1.12118 |
| 10358581 | 545370 | Hmcn1   | hemicentin 1                                                                                 | 1.12096 |
| 10562408 | 68947  | Chst8   | carbohydrate (N-acetylgalactosamine 4-O) sulfotransferase 8                                  | 1.12058 |
| 10343301 | -      | -       | -                                                                                            | 1.1203  |
| 10368495 | 72780  | Rspo3   | R-spondin 3 homolog (Xenopus laevis)                                                         | 1.12023 |
| 10550574 | 13400  | Dmpk    | dystrophia myotonica-protein kinase                                                          | 1.11948 |
| 10572398 | 12931  | Crlf1   | cytokine receptor-like factor 1                                                              | 1.11809 |
| 10415857 | 219148 | Fam167a | family with sequence similarity 167, member A                                                | 1.11761 |
| 10358529 | 545370 | Hmcn1   | hemicentin 1                                                                                 | 1.11612 |
| 10439612 | 117606 | Boc     | biregional cell adhesion molecule-related/down-regulated by oncogenes (Cdon) binding protein | 1.11414 |
| 10416800 | 380928 | Lmo7    | LIM domain only 7                                                                            | 1.11374 |

|          |        |          |                                                                                           |         |
|----------|--------|----------|-------------------------------------------------------------------------------------------|---------|
| 10487040 | -      | -        | -                                                                                         | 1.11284 |
| 10586306 | 56741  | Igdcc4   | immunoglobulin superfamily, DCC subclass, member 4                                        | 1.11199 |
| 10569494 | 79202  | Tnfrsf22 | tumor necrosis factor receptor superfamily, member 22                                     | 1.11175 |
| 10338807 | -      | -        | -                                                                                         | 1.11175 |
| 10508012 | 192199 | Rspo1    | R-spondin homolog ( <i>Xenopus laevis</i> )                                               | 1.11023 |
| 10395466 | 238130 | Dock4    | dedicator of cytokinesis 4                                                                | 1.10906 |
| 10403743 | 16323  | Inhba    | inhibin beta-A                                                                            | 1.10895 |
| 10372831 | 74694  | Tbc1d30  | TBC1 domain family, member 30                                                             | 1.10862 |
| 10344121 | -      | -        | -                                                                                         | 1.10624 |
| 10371502 | 14077  | Fabp3    | fatty acid binding protein 3, muscle and heart                                            | 1.1059  |
| 10538658 | 73998  | Herc3    | hect domain and RLD 3                                                                     | 1.10589 |
| 10492136 | 13175  | Dclk1    | doublecortin-like kinase 1                                                                | 1.10347 |
| 10427744 | 75646  | Rai14    | retinoic acid induced 14                                                                  | 1.1005  |
| 10339571 | -      | -        | -                                                                                         | 1.09633 |
| 10341785 | -      | -        | -                                                                                         | 1.09584 |
| 10493555 | 140493 | Kcnn3    | potassium intermediate/small conductance calcium-activated channel, subfamily N, member 3 | 1.09569 |
| 10589654 | 235633 | Als2cl   | ALS2 C-terminal like                                                                      | 1.09536 |
| 10471247 | 108897 | Aif1l    | allograft inflammatory factor 1-like                                                      | 1.09469 |
| 10341440 | -      | -        | -                                                                                         | 1.09133 |
| 10405779 | -      | -        | -                                                                                         | 1.08818 |
| 10579812 | 13617  | Ednra    | endothelin receptor type A                                                                | 1.08476 |
| 10372891 | 117600 | Srgap1   | SLIT-ROBO Rho GTPase activating protein 1                                                 | 1.08259 |
| 10364784 | 70335  | Reep6    | receptor accessory protein 6                                                              | 1.07976 |
| 10356712 | 16560  | Kif1a    | kinesin family member 1A                                                                  | 1.07704 |
| 10365482 | 21859  | Timp3    | tissue inhibitor of metalloproteinase 3                                                   | 1.07472 |
| 10343723 | -      | -        | -                                                                                         | 1.0746  |
| 10548038 | 18205  | Ntf3     | neurotrophin 3                                                                            | 1.07395 |
| 10455721 | 67847  | Sncaip   | synuclein, alpha interacting protein (synphilin)                                          | 1.07299 |
| 10566767 | 76954  | St5      | suppression of tumorigenicity 5                                                           | 1.06863 |
| 10344328 | -      | -        | -                                                                                         | 1.06699 |
| 10342561 | -      | -        | -                                                                                         | 1.0653  |
| 10569341 | 14955  | H19      | H19 fetal liver mRNA                                                                      | 1.06527 |
| 10339881 | -      | -        | -                                                                                         | 1.06465 |
| 10343062 | -      | -        | -                                                                                         | 1.06429 |
| 10339771 | -      | -        | -                                                                                         | 1.06397 |
| 10439009 | 11815  | Apod     | apolipoprotein D                                                                          | 1.06319 |
| 10340083 | -      | -        | -                                                                                         | 1.06272 |
| 10398326 | 17263  | Meg3     | maternally expressed 3                                                                    | 1.06133 |
| 10559509 | 58804  | Cdc42ep5 | CDC42 effector protein (Rho GTPase binding) 5                                             | 1.06126 |
| 10415411 | 277154 | Nynrin   | NYN domain and retroviral integrase containing                                            | 1.06088 |
| 10341411 | -      | -        | -                                                                                         | 1.06087 |
| 10569017 | 66141  | Ifitm3   | interferon induced transmembrane protein 3                                                | 1.05931 |
| 10343057 | -      | -        | -                                                                                         | 1.05891 |
| 10342796 | -      | -        | -                                                                                         | 1.05876 |

|          |        |           |                                                                                               |         |
|----------|--------|-----------|-----------------------------------------------------------------------------------------------|---------|
| 10340722 | -      | -         | -                                                                                             | 1.05793 |
| 10529636 | 64293  | Stk32b    | serine/threonine kinase 32B                                                                   | 1.0564  |
| 10343125 | -      | -         | -                                                                                             | 1.05495 |
| 10344375 | -      | -         | -                                                                                             | 1.05421 |
| 10342364 | -      | -         | -                                                                                             | 1.0526  |
| 10342966 | -      | -         | -                                                                                             | 1.05258 |
| 10488147 | 71436  | Flrt3     | fibronectin leucine rich transmembrane protein 3                                              | 1.05168 |
| 10348451 | 12778  | Cxcr7     | chemokine (C-X-C motif) receptor 7                                                            | 1.05139 |
| 10440344 | 268902 | Robo2     | roundabout homolog 2 (Drosophila)                                                             | 1.05072 |
| 10521537 | 231162 | Cytl1     | cytokine-like 1                                                                               | 1.05042 |
| 10357870 | 116847 | Prelp     | proline arginine-rich end leucine-rich repeat                                                 | 1.0502  |
| 10522558 | -      | -         | -                                                                                             | 1.05002 |
| 10343422 | -      | -         | -                                                                                             | 1.04959 |
| 10481056 | 18128  | Notch1    | Notch gene homolog 1 (Drosophila)                                                             | 1.04783 |
| 10347398 | -      | -         | -                                                                                             | 1.04747 |
| 10358525 | 545370 | Hmcn1     | hemicentin 1                                                                                  | 1.04489 |
| 10341960 | -      | -         | -                                                                                             | 1.04427 |
| 10366546 | 70574  | Cpm       | carboxypeptidase M                                                                            | 1.04327 |
| 10405783 | -      | -         | -                                                                                             | 1.04309 |
| 10457587 | 225207 | Zfp521    | zinc finger protein 521                                                                       | 1.04131 |
| 10462507 | 23972  | Papss2    | 3'-phosphoadenosine 5'-phosphosulfate synthase 2                                              | 1.04089 |
| 10339120 | -      | -         | -                                                                                             | 1.04019 |
| 10343358 | -      | -         | -                                                                                             | 1.04016 |
| 10372028 | 54712  | Plxnc1    | plexin C1                                                                                     | 1.03985 |
| 10578222 | -      | -         | -                                                                                             | 1.03978 |
| 10344401 | -      | -         | -                                                                                             | 1.0397  |
| 10415408 | 277154 | Nynrin    | NYN domain and retroviral integrase containing                                                | 1.03823 |
| 10341441 | -      | -         | -                                                                                             | 1.03552 |
| 10448925 | 58226  | Cacna1h   | calcium channel, voltage-dependent, T type, alpha 1H subunit                                  | 1.0353  |
| 10338405 | -      | -         | -                                                                                             | 1.03432 |
| 10344123 | -      | -         | -                                                                                             | 1.03402 |
| 10343886 | -      | -         | -                                                                                             | 1.03377 |
| 10378549 | 237847 | Rtn4r1l   | reticulon 4 receptor-like 1                                                                   | 1.03345 |
| 10358660 | 545370 | Hmcn1     | hemicentin 1                                                                                  | 1.03313 |
| 10339529 | -      | -         | -                                                                                             | 1.03188 |
| 10369702 | 52463  | Tet1      | tet oncogene 1                                                                                | 1.03072 |
| 10569504 | 79201  | Tnfrsf23  | tumor necrosis factor receptor superfamily, member 23                                         | 1.03044 |
| 10524312 | 209683 | Ttc28     | tetratricopeptide repeat domain 28                                                            | 1.0282  |
| 10507099 | 666048 | Gm12824   | predicted gene 12824                                                                          | 1.02766 |
| 10398420 | -      | -         | -                                                                                             | 1.02725 |
| 10546430 | 101401 | Adamts9   | a disintegrin-like and metallopeptidase (reprolysin type) with thrombospondin type 1 motif, 9 | 1.02688 |
| 10503259 | 60599  | Trp53inp1 | transformation related protein 53 inducible nuclear protein 1                                 | 1.02682 |
| 10604961 | 14396  | Gabra3    | gamma-aminobutyric acid (GABA) A receptor, subunit alpha 3                                    | 1.02561 |

|          |        |        |                                            |         |
|----------|--------|--------|--------------------------------------------|---------|
| 10395908 | -      | -      | -                                          | 1.02533 |
| 10474361 | 77015  | Mppd2  | metallophosphoesterase domain containing 2 | 1.02526 |
| 10540408 | 16438  | Itpr1  | inositol 1,4,5-triphosphate receptor 1     | 1.02466 |
| 10338696 | -      | -      | -                                          | 1.02271 |
| 10459905 | 240427 | Setbp1 | SET binding protein 1                      | 1.02115 |
| 10466886 | -      | -      | -                                          | 1.02091 |
| 10367400 | 58223  | Mmp19  | matrix metalloproteinase 19                | 1.01917 |
| 10369690 | 52463  | Tet1   | tet oncogene 1                             | 1.01858 |
| 10338562 | -      | -      | -                                          | 1.01805 |
| 10429140 | 17988  | Ndrp1  | N-myc downstream regulated gene 1          | 1.0176  |
| 10580577 | 16373  | Irx3   | Iroquois related homeobox 3 (Drosophila)   | 1.01743 |
| 10412921 | 18074  | Nid2   | nidogen 2                                  | 1.0163  |
| 10342727 | -      | -      | -                                          | 1.01508 |
| 10454514 | -      | -      | -                                          | 1.01485 |
| 10339663 | -      | -      | -                                          | 1.01436 |
| 10339223 | -      | -      | -                                          | 1.01391 |
| 10574545 | 234673 | Ces5   | carboxylesterase 5                         | 1.0136  |
| 10343056 | -      | -      | -                                          | 1.01301 |
| 10374366 | 13649  | Egfr   | epidermal growth factor receptor           | 1.01162 |
| 10427471 | 18414  | Osmr   | oncostatin M receptor                      | 1.0115  |
| 10404996 | 18081  | Ninj1  | ninjurin 1                                 | 1.0111  |
| 10524310 | 209683 | Ttc28  | tetratricopeptide repeat domain 28         | 1.01078 |
| 10340141 | -      | -      | -                                          | 1.01066 |
| 10574259 | 14766  | Gpr56  | G protein-coupled receptor 56              | 1.00995 |
| 10343688 | -      | -      | -                                          | 1.00968 |
| 10340407 | -      | -      | -                                          | 1.00828 |
| 10342063 | -      | -      | -                                          | 1.00824 |
| 10424683 | 546644 | Ly6g   | lymphocyte antigen 6 complex, locus G      | 1.00597 |
| 10341946 | -      | -      | -                                          | 1.00557 |
| 10340997 | -      | -      | -                                          | 1.00531 |
| 10361358 | 56533  | Rgs17  | regulator of G-protein signaling 17        | 1.00308 |
| 10413171 | -      | -      | -                                          | 1.00044 |

### List of genes repressed by SS18-SSX1 expression in C3H10T1/2

| probeset | gene id | gene symbol | gene name                                 | logFC    |
|----------|---------|-------------|-------------------------------------------|----------|
| 10403579 | 107849  | Prl2c5      | prolactin family 2, subfamily c, member 5 | -3.79667 |
| 10407797 | -       | -           | -                                         | -3.78516 |
| 10367582 | 22353   | Vip         | vasoactive intestinal polypeptide         | -3.44102 |

|          |        |               |                                                                                               |          |
|----------|--------|---------------|-----------------------------------------------------------------------------------------------|----------|
| 10406504 | 13612  | Edil3         | EGF-like repeats and discoidin I-like domains 3                                               | -2.52187 |
| 10538482 | 11517  | Adcyap1r1     | adenylate cyclase activating polypeptide 1 receptor 1                                         | -2.52106 |
| 10341932 | -      | -             | -                                                                                             | -2.45341 |
| 10342476 | -      | -             | -                                                                                             | -2.42986 |
| 10519857 | 15234  | Hgf           | hepatocyte growth factor                                                                      | -2.41857 |
| 10547657 | 12267  | C3ar1         | complement component 3a receptor 1                                                            | -2.38806 |
| 10368999 | 14806  | Grik2         | glutamate receptor, ionotropic, kainate 2 (beta 2)                                            | -2.17592 |
| 10367591 | 68632  | Myct1         | myc target 1                                                                                  | -2.13993 |
| 10572070 | 18166  | Npy1r         | neuropeptide Y receptor Y1                                                                    | -2.126   |
| 10480003 | 16425  | Itih2         | inter-alpha trypsin inhibitor, heavy chain 2                                                  | -2.11725 |
| 10502230 | -      | -             | -                                                                                             | -2.09178 |
| 10494043 | 72634  | Tdrkh         | tudor and KH domain containing protein                                                        | -1.96261 |
| 10436666 | 67374  | Jam2          | junction adhesion molecule 2                                                                  | -1.94722 |
| 10406982 | 108154 | Adamts6       | a disintegrin-like and metallopeptidase (reprolysin type) with thrombospondin type 1 motif, 6 | -1.94086 |
| 10579012 | 234356 | Csgalnact1    | chondroitin sulfate N-acetylgalactosaminyltransferase 1                                       | -1.82749 |
| 10344135 | -      | -             | -                                                                                             | -1.77193 |
| 10340985 | -      | -             | -                                                                                             | -1.76239 |
| 10340018 | -      | -             | -                                                                                             | -1.73756 |
| 10343791 | -      | -             | -                                                                                             | -1.70673 |
| 10341524 | -      | -             | -                                                                                             | -1.70373 |
| 10395155 | 104943 | Fam110c       | family with sequence similarity 110, member C                                                 | -1.68948 |
| 10556302 | 11717  | Ampd3         | adenosine monophosphate deaminase 3                                                           | -1.66368 |
| 10343148 | -      | -             | -                                                                                             | -1.66118 |
| 10340650 | -      | -             | -                                                                                             | -1.65625 |
| 10426581 | 239650 | AI836003      | expressed sequence AI836003                                                                   | -1.56047 |
| 10342497 | -      | -             | -                                                                                             | -1.55956 |
| 10491860 | 269424 | Phf17         | PHD finger protein 17                                                                         | -1.55639 |
| 10341668 | -      | -             | -                                                                                             | -1.54668 |
| 10467191 | 107765 | Ankrd1        | ankyrin repeat domain 1 (cardiac muscle)                                                      | -1.54296 |
| 10554863 | 83671  | Syt12         | synaptotagmin-like 2                                                                          | -1.53443 |
| 10543120 | 15893  | Ica1          | islet cell autoantigen 1                                                                      | -1.52133 |
| 10360398 | 26388  | Ifi202b       | interferon activated gene 202B                                                                | -1.51686 |
| 10341974 | -      | -             | -                                                                                             | -1.50212 |
| 10341635 | -      | -             | -                                                                                             | -1.49174 |
| 10344222 | -      | -             | -                                                                                             | -1.48841 |
| 10404422 | 20708  | Serpinb6b     | serine (or cysteine) peptidase inhibitor, clade B, member 6b                                  | -1.4762  |
| 10386076 | 14654  | Gla1          | glycine receptor, alpha 1 subunit                                                             | -1.47147 |
| 10578880 | 21892  | Tll1          | tolloid-like                                                                                  | -1.46388 |
| 10339108 | -      | -             | -                                                                                             | -1.44103 |
| 10353102 | 329093 | Cpa6          | carboxypeptidase A6                                                                           | -1.42994 |
| 10459496 | 320924 | Ccbe1         | collagen and calcium binding EGF domains 1                                                    | -1.42068 |
| 10354432 | 17912  | Myo1b         | myosin IB                                                                                     | -1.41668 |
| 10601993 | 102871 | D330045A20Rik | RIKEN cDNA D330045A20 gene                                                                    | -1.40742 |
| 10458382 | 12475  | Cd14          | CD14 antigen                                                                                  | -1.386   |

|          |        |               |                                                             |          |
|----------|--------|---------------|-------------------------------------------------------------|----------|
| 10341915 | -      | -             | -                                                           | -1.38516 |
| 10351477 | 26904  | Sh2d1b1       | SH2 domain protein 1B1                                      | -1.37498 |
| 10447732 | 69310  | Pacrg         | PARK2 co-regulated                                          | -1.37398 |
| 10339720 | -      | -             | -                                                           | -1.37349 |
| 10341562 | -      | -             | -                                                           | -1.36401 |
| 10602009 | 66889  | Rnf128        | ring finger protein 128                                     | -1.36398 |
| 10343879 | -      | -             | -                                                           | -1.35077 |
| 10375402 | 11492  | Adam19        | a disintegrin and metallopeptidase domain 19 (meltrin beta) | -1.34576 |
| 10338250 | -      | -             | -                                                           | -1.34551 |
| 10367982 | 215798 | Gpr126        | G protein-coupled receptor 126                              | -1.34311 |
| 10339788 | -      | -             | -                                                           | -1.34265 |
| 10344501 | -      | -             | -                                                           | -1.34056 |
| 10343493 | -      | -             | -                                                           | -1.33367 |
| 10544440 | -      | -             | -                                                           | -1.32506 |
| 10340560 | -      | -             | -                                                           | -1.32454 |
| 10545065 | 243385 | Gprin3        | GPRIN family member 3                                       | -1.3236  |
| 10340974 | -      | -             | -                                                           | -1.32316 |
| 10342752 | -      | -             | -                                                           | -1.32139 |
| 10338502 | -      | -             | -                                                           | -1.31938 |
| 10499941 | 433619 | Kprp          | keratinocyte expressed, proline-rich                        | -1.3169  |
| 10423333 | 66270  | Fam134b       | family with sequence similarity 134, member B               | -1.31599 |
| 10338069 | -      | -             | -                                                           | -1.31311 |
| 10344424 | -      | -             | -                                                           | -1.31054 |
| 10599562 | 75404  | 1100001E04Rik | RIKEN cDNA 1100001E04 gene                                  | -1.30805 |
| 10433887 | 67451  | Pkp2          | plakophilin 2                                               | -1.30022 |
| 10344523 | -      | -             | -                                                           | -1.29193 |
| 10338775 | -      | -             | -                                                           | -1.286   |
| 10338267 | -      | -             | -                                                           | -1.28024 |
| 10338097 | -      | -             | -                                                           | -1.27714 |
| 10339338 | -      | -             | -                                                           | -1.26737 |
| 10343012 | -      | -             | -                                                           | -1.25777 |
| 10344245 | -      | -             | -                                                           | -1.25669 |
| 10343929 | -      | -             | -                                                           | -1.25625 |
| 10351206 | 20344  | Selp          | selectin, platelet                                          | -1.2538  |
| 10339470 | -      | -             | -                                                           | -1.25346 |
| 10539517 | 26903  | Dysf          | dysferlin                                                   | -1.25169 |
| 10339819 | -      | -             | -                                                           | -1.24719 |
| 10471721 | 19224  | Ptgs1         | prostaglandin-endoperoxide synthase 1                       | -1.24663 |
| 10340015 | -      | -             | -                                                           | -1.24551 |
| 10406823 | -      | -             | -                                                           | -1.24407 |
| 10342972 | -      | -             | -                                                           | -1.23906 |
| 10342694 | -      | -             | -                                                           | -1.23642 |
| 10341001 | -      | -             | -                                                           | -1.23037 |
| 10340207 | -      | -             | -                                                           | -1.22726 |
| 10344033 | -      | -             | -                                                           | -1.22685 |

|          |        |               |                                                         |          |
|----------|--------|---------------|---------------------------------------------------------|----------|
| 10338961 | -      | -             | -                                                       | -1.21753 |
| 10428509 | 239420 | Csmd3         | CUB and Sushi multiple domains 3                        | -1.21523 |
| 10501802 | 99887  | Tmem56        | transmembrane protein 56                                | -1.21032 |
| 10600901 | 11835  | Ar            | androgen receptor                                       | -1.20799 |
| 10342082 | -      | -             | -                                                       | -1.20771 |
| 10368289 | 18605  | Enpp1         | ectonucleotide pyrophosphatase/phosphodiesterase 1      | -1.20168 |
| 10562731 | -      | -             | -                                                       | -1.20163 |
| 10409833 | 14451  | Gas1          | growth arrest specific 1                                | -1.19062 |
| 10567355 | 64297  | Gprc5b        | G protein-coupled receptor, family C, group 5, member B | -1.18738 |
| 10341287 | -      | -             | -                                                       | -1.18132 |
| 10340887 | -      | -             | -                                                       | -1.18027 |
| 10343224 | -      | -             | -                                                       | -1.18026 |
| 10573747 | 11513  | Adcy7         | adenylate cyclase 7                                     | -1.18016 |
| 10338417 | -      | -             | -                                                       | -1.17947 |
| 10338850 | -      | -             | -                                                       | -1.17619 |
| 10523758 | 433926 | Lrrc8b        | leucine rich repeat containing 8 family, member B       | -1.17196 |
| 10530998 | 243083 | Tmprss11f     | transmembrane protease, serine 11f                      | -1.17106 |
| 10344329 | -      | -             | -                                                       | -1.16768 |
| 10340262 | -      | -             | -                                                       | -1.15648 |
| 10421932 | 211712 | Pcdh9         | protocadherin 9                                         | -1.15611 |
| 10341140 | -      | -             | -                                                       | -1.15456 |
| 10338341 | -      | -             | -                                                       | -1.1536  |
| 10502156 | 66815  | Ccdc109b      | coiled-coil domain containing 109B                      | -1.15281 |
| 10395596 | -      | -             | -                                                       | -1.15039 |
| 10340099 | -      | -             | -                                                       | -1.14906 |
| 10503448 | 17389  | Mmp16         | matrix metalloproteinase 16                             | -1.14517 |
| 10343995 | -      | -             | -                                                       | -1.14476 |
| 10342174 | -      | -             | -                                                       | -1.14112 |
| 10544438 | -      | -             | -                                                       | -1.13725 |
| 10338489 | -      | -             | -                                                       | -1.13659 |
| 10341902 | -      | -             | -                                                       | -1.12949 |
| 10340949 | -      | -             | -                                                       | -1.11953 |
| 10506470 | 242594 | 1700024P16Rik | RIKEN cDNA 1700024P16 gene                              | -1.11937 |
| 10479950 | 14007  | Cugbp2        | CUG triplet repeat, RNA binding protein 2               | -1.11833 |
| 10344409 | -      | -             | -                                                       | -1.1114  |
| 10341631 | -      | -             | -                                                       | -1.1112  |
| 10380289 | 67468  | Mmd           | monocyte to macrophage differentiation-associated       | -1.10997 |
| 10341521 | -      | -             | -                                                       | -1.10947 |
| 10428453 | 239420 | Csmd3         | CUB and Sushi multiple domains 3                        | -1.10684 |
| 10339596 | -      | -             | -                                                       | -1.10565 |
| 10523717 | 20750  | Spp1          | secreted phosphoprotein 1                               | -1.10511 |
| 10339129 | -      | -             | -                                                       | -1.1001  |
| 10411459 | 380863 | Tmem171       | transmembrane protein 171                               | -1.09856 |
| 10344233 | -      | -             | -                                                       | -1.09562 |
| 10366376 | 353025 | Caps2         | calcyphosphine 2                                        | -1.09406 |



|          |        |               |                                                                                           |          |
|----------|--------|---------------|-------------------------------------------------------------------------------------------|----------|
| 10340806 | -      | -             | -                                                                                         | -1.09396 |
| 10341767 | -      | -             | -                                                                                         | -1.09087 |
| 10417579 | 74430  | 4930452B06Rik | RIKEN cDNA 4930452B06 gene                                                                | -1.0906  |
| 10338379 | -      | -             | -                                                                                         | -1.08517 |
| 10541075 | 20315  | Cxcl12        | chemokine (C-X-C motif) ligand 12                                                         | -1.08255 |
| 10581813 | 74568  | Mlkl          | mixed lineage kinase domain-like                                                          | -1.0804  |
| 10344299 | -      | -             | -                                                                                         | -1.07695 |
| 10571907 | 71306  | Mfap3l        | microfibrillar-associated protein 3-like                                                  | -1.07638 |
| 10340021 | -      | -             | -                                                                                         | -1.07622 |
| 10341751 | -      | -             | -                                                                                         | -1.07392 |
| 10584259 | 235180 | Fez1          | fasciculation and elongation protein zeta 1 (zygin I)                                     | -1.07282 |
| 10338302 | -      | -             | -                                                                                         | -1.07026 |
| 10342570 | -      | -             | -                                                                                         | -1.06931 |
| 10342173 | -      | -             | -                                                                                         | -1.06838 |
| 10414269 | 12176  | Bnip3         | BCL2/adenovirus E1B interacting protein 3                                                 | -1.0667  |
| 10343269 | -      | -             | -                                                                                         | -1.06486 |
| 10341457 | -      | -             | -                                                                                         | -1.06269 |
| 10342291 | -      | -             | -                                                                                         | -1.06097 |
| 10522368 | 70701  | Nipal1        | NIPA-like domain containing 1                                                             | -1.06063 |
| 10340128 | -      | -             | -                                                                                         | -1.06045 |
| 10339087 | -      | -             | -                                                                                         | -1.05301 |
| 10343059 | -      | -             | -                                                                                         | -1.05231 |
| 10358434 | 18783  | Pla2g4a       | phospholipase A2, group IVA (cytosolic, calcium-dependent)                                | -1.05181 |
| 10339060 | -      | -             | -                                                                                         | -1.04957 |
| 10375443 | 171285 | Havcr2        | hepatitis A virus cellular receptor 2                                                     | -1.04894 |
| 10340726 | -      | -             | -                                                                                         | -1.04768 |
| 10518147 | 14726  | Pdpn          | podoplanin                                                                                | -1.04456 |
| 10536505 | 17295  | Met           | met proto-oncogene                                                                        | -1.04302 |
| 10344384 | -      | -             | -                                                                                         | -1.04206 |
| 10427590 | 20512  | Slc1a3        | solute carrier family 1 (glial high affinity glutamate transporter), member 3             | -1.04148 |
| 10340351 | -      | -             | -                                                                                         | -1.03904 |
| 10472923 | 11639  | Ak3l1         | adenylate kinase 3-like 1                                                                 | -1.03836 |
| 10550877 | 16534  | Kcnn4         | potassium intermediate/small conductance calcium-activated channel, subfamily N, member 4 | -1.03769 |
| 10344552 | -      | -             | -                                                                                         | -1.03702 |
| 10338787 | -      | -             | -                                                                                         | -1.03424 |
| 10389214 | 20308  | Ccl9          | chemokine (C-C motif) ligand 9                                                            | -1.0338  |
| 10395457 | 14009  | Etv1          | ets variant gene 1                                                                        | -1.03085 |
| 10344588 | -      | -             | -                                                                                         | -1.03022 |
| 10501586 | 13609  | S1pr1         | sphingosine-1-phosphate receptor 1                                                        | -1.02963 |
| 10338538 | -      | -             | -                                                                                         | -1.02909 |
| 10607888 | 333605 | Frmpd4        | FERM and PDZ domain containing 4                                                          | -1.0282  |
| 10339429 | -      | -             | -                                                                                         | -1.02775 |
| 10340133 | -      | -             | -                                                                                         | -1.02698 |
| 10504670 | -      | -             | -                                                                                         | -1.02621 |

|          |        |       |                                                         |          |
|----------|--------|-------|---------------------------------------------------------|----------|
| 10355312 | 22779  | Ikzf2 | IKAROS family zinc finger 2                             | -1.02612 |
| 10342496 | -      | -     | -                                                       | -1.0182  |
| 10421924 | 211712 | Pcdh9 | protocadherin 9                                         | -1.01532 |
| 10511703 | 192656 | Ripk2 | receptor (TNFRSF)-interacting serine-threonine kinase 2 | -1.01184 |
| 10344598 | -      | -     | -                                                       | -1.01075 |
| 10341448 | -      | -     | -                                                       | -1.01067 |
| 10341990 | -      | -     | -                                                       | -1.00327 |

Table S2. Overlap of the lists of differentially expressed genes with the lists of various recently published stemness markers, with the genes whose TSS lies within a CpG island (CpG), with the databases of chromatin-related genes (ChromnoDB) and with the databases of imprinted genes Geneimprint and Otago.

| <b>STEMNESS MARKERS</b> |                                     |                                        |
|-------------------------|-------------------------------------|----------------------------------------|
|                         | Repressed                           | Induced                                |
| ES_exp1                 | <a href="#">n=3 (1.3) P=0.15</a>    | <a href="#">n= 11 (6) P=0.04</a>       |
| ES_exp2                 | n=0 (0.1) P=1                       | n=0 (0.7) P=1                          |
| Eed_targets             | <a href="#">n= 9(3.6) P=0.0089</a>  | <a href="#">n= 55 (16.2) P=1.5e-15</a> |
| H3K27_bound             | <a href="#">n= 6 (3.8) P=0.19</a>   | <a href="#">n= 49 (17.5) P=7.6e-11</a> |
| Myc_targets1            | <a href="#">n= 3 (0.7) P=0.037</a>  | <a href="#">n= 6 (3.3) P=0.12</a>      |
| Myc_targets2            | <a href="#">n=1 (2.5) P=0.92</a>    | <a href="#">n= 2 (11.4) P=1</a>        |
| NOS_TFs                 | <a href="#">n= 1 (0.1) P=0.12</a>   | <a href="#">n= 1 (0.6) P=0.45</a>      |
| NOS_targets             | <a href="#">n= 3 (0.6) P=0.022</a>  | <a href="#">n= 6 (2.7) P=0.055</a>     |
| Nanog_targets           | <a href="#">n= 5 (3.4) P=0.25</a>   | <a href="#">n= 26 (15.5) P=0.0072</a>  |
| Oct4_targets            | <a href="#">n= 4 (1) P=0.017</a>    | <a href="#">n= 8 (4.5) P=0.081</a>     |
| PRC2_targets            | <a href="#">n= 6 (2.3) P=0.026</a>  | <a href="#">n= 30 (10.3) P=1.9e-07</a> |
| Sox2_targets            | <a href="#">n=4 (2.5) P=0.24</a>    | <a href="#">n= 19 (11.4) P=0.022</a>   |
| Suz12_targets           | <a href="#">n= 7 (3.6) P=0.069</a>  | <a href="#">n= 51 (16.4) P=5.8e-13</a> |
| <b>IMPRINTING</b>       |                                     |                                        |
|                         | Repressed                           | Induced                                |
| chromDB                 | n=0 (1.1) P=1                       | <a href="#">n= 1 (4.9) P=0.99</a>      |
| CpG                     | <a href="#">n= 30 (36.4) P=0.94</a> | <a href="#">n= 185 (166) P=0.026</a>   |
| GENEIMPRINT             | n=0 (0.2) P=1                       | <a href="#">n= 8 (1) P=7.2e-06</a>     |
| OTAGO                   | <a href="#">n= 1 (0.2) P=0.22</a>   | <a href="#">n= 9 (1.1) P=1.6e-06</a>   |

Statistical analysis: n = number of found genes. In parenthesis number of expected by chance . P-values are indicated, significant P-values (P<0.02) are in bold. Links provide the corresponding lists of genes.

Table S3. Overlap of the lists of differentially expressed genes with the sarcoma signatures identified in Francis et al, 2007, BMC Genomics 8: 73 and in Baird et al, 2005.

Statistical analysis: n=number of found genes. In parenthesis number of expected by chance . P-values are indicated, significant P-values (P<0.02) are in bold. Links provide the corresponding lists of genes.

| <b>BAIRD</b> |                  |         |                   |                  |
|--------------|------------------|---------|-------------------|------------------|
|              | <b>repressed</b> |         | <b>induced</b>    |                  |
| DFSP         | <u>n=3 (0.7)</u> | P=0.032 | <u>n=13 (3.1)</u> | <b>P=1.7e-05</b> |
| EWS          | <u>n=2 (0.8)</u> | P=0.21  | <u>n=6 (3.8)</u>  | P=0.19           |
| FIBRO        | n=0 (0.3)        | P=1     | <u>n=2 (1.5)</u>  | P=0.45           |
| GIST         | <u>n=1 (0.9)</u> | P=0.61  | <u>n=12 (4.3)</u> | <b>P=0.0013</b>  |
| HPC          | n=0 (0.7)        | P=1     | <u>n=7 (3.2)</u>  | P=0.043          |
| LIPO         | <u>n=2 (0.6)</u> | P=0.12  | <u>n=5 (2.8)</u>  | P=0.14           |
| LMS          | <u>n=1 (0.7)</u> | P=0.53  | <u>n=4 (3.4)</u>  | P=0.44           |
| MFH          | <u>n=3 (1.1)</u> | P=0.097 | <u>n=7 (5.0)</u>  | P=0.23           |
| MPNST        | n=0 (0.5)        | P=1     | <u>n=1 (2.5)</u>  | P=0.92           |
| MULL         | <u>n=2 (0.4)</u> | P=0.065 | <u>n=3 (1.9)</u>  | P=0.29           |
| OS           | n=0 (0.4)        | P=1     | <u>n=7 (1.9)</u>  | <b>P=0.0032</b>  |
| RMS          | <u>n=1 (0.5)</u> | P=0.42  | <u>n=11 (2.5)</u> | <b>P=4e-05</b>   |
| SS           | n=0 (0.6)        | P=1     | <u>n=12 (2.5)</u> | <b>P=9.2e-06</b> |

Abbreviations: DFSP = dermatofibrosarcoma; EWS = Ewing's sarcoma; FIBRO = fibrosarcoma; GIST = gastrointestinal stromal tumor; HPC = hemangiopericytoma; LMS = leiomyosarcoma; LIPO = liposarcoma; MFH = malignant fibrous histiocytoma; OS = osteosarcoma; MPNST = malignant peripheral nerve sheath tumor; RMS = rhabdomyosarcoma; SS = synovial sarcoma.

| FRANCIS |           |                   |                  |                    |                  |
|---------|-----------|-------------------|------------------|--------------------|------------------|
|         |           | repressed         |                  | induced            |                  |
| DIPLIPO | repressed | n=0 (0.2)         | P=1              | n=0 (0.9)          | P=1              |
|         | induced   | n=0 (0.3)         | P=1              | <u>n=4 (1.2)</u>   | P=0.036          |
| FIBRO   | repressed | <u>n=1 (0.2)</u>  | P=0.16           | <u>n=3 (0.8)</u>   | P=0.043          |
|         | induced   | n=0 (0.4)         | P=1              | <u>n=12 (2.0)</u>  | <b>P=9.1e-07</b> |
| GIST    | repressed | <u>n=5 (2.7)</u>  | P=0.13           | <u>n=28 (12.3)</u> | <b>P=5.2e-05</b> |
|         | induced   | <u>n=2 (2.1)</u>  | P=0.62           | <u>n=17 (9.6)</u>  | <b>P=0.016</b>   |
| LEIO    | repressed | <u>n=2 (0.7)</u>  | P=0.16           | <u>n=11 (3.3)</u>  | <b>P=0.00052</b> |
|         | induced   | <u>n=3 (0.9)</u>  | P=0.055          | <u>n=4 (3.9)</u>   | P=0.55           |
| MFHUPS  | repressed | n=0 (0.7)         | P=1              | <u>n=8 (3.4)</u>   | P=0.021          |
|         | induced   | n=0 (0.8)         | P=1              | <u>n=5 (3.8)</u>   | P=0.33           |
| MPNST   | repressed | <u>n=3 (0.8)</u>  | P=0.041          | <u>n=4 (3.5)</u>   | P=0.46           |
|         | induced   | n=0 (0.8)         | P=1              | <u>n=10 (3.6)</u>  | <b>P=0.0038</b>  |
| MYXLIPO | repressed | <u>n=4 (1.7)</u>  | P=0.097          | <u>n=13 (7.9)</u>  | P=0.057          |
|         | induced   | <u>n=2 (1.4)</u>  | P=0.4            | <u>n=17 (6.2)</u>  | <b>P=0.0002</b>  |
| SS      | repressed | <u>n=21 (6.7)</u> | <b>P=1.8e-06</b> | <u>n=48 (30.5)</u> | <b>P=0.0012</b>  |
|         | induced   | <u>n=2 (5.6)</u>  | P=0.98           | <u>n=59 (25.3)</u> | <b>P=9.8e-10</b> |

Abbreviations: SS = synovial sarcoma. Dplipo=differentiated/pleomorphic liposarcoma. Fibro= fibrosarcoma. Gist= gastrointestinal stromal tumor. Leio= leiomyosarcoma. Mfhups=malignant fibrous histiocytoma undifferentiated pleomorphic sarcoma. Mpnst= malignant peripheral nerve sheath tumor. myxliipo= myxoid liposarcoma

Table S4. List of genes affected by SS18-SSX1 in C3H10T1/2 and included in the KEGG pathway term 04310 (Wnt signaling pathway), in the Wnt targets database or in the lists of genes affected by stimulation of C3H10T1/2 with recombinant WNT3a.

**KEGG pathway term 04310 (Wnt signaling pathway)**

**Induced.** Statistical analysis: 9 elements, expected 2.5,  $P = 0.00106899$ .

|        |                                                                           |
|--------|---------------------------------------------------------------------------|
| Axin2  | axin2                                                                     |
| Fzd1   | frizzled homolog 1 (Drosophila)                                           |
| Nfatc4 | nuclear factor of activated T-cells, cytoplasmic, calcineurin-dependent 4 |
| Nkd1   | naked cuticle 1 homolog (Drosophila)                                      |
| Nkd2   | naked cuticle 2 homolog (Drosophila)                                      |
| Sfrp2  | secreted frizzled-related protein 2                                       |
| Wif1   | Wnt inhibitory factor 1                                                   |
| Wnt5a  | wingless-related MMTV integration site 5A                                 |
| Wnt6   | wingless-related MMTV integration site 6                                  |

**Wnt targets**

**Induced.** Statistical analysis: 17 elements, expected 1.6,  $P = 5.2e-13$ .

|       |                                                             |
|-------|-------------------------------------------------------------|
| Axin2 | axin2                                                       |
| Bmp4  | bone morphogenetic protein 4                                |
| Cldn1 | claudin 1                                                   |
| Edn1  | endothelin 1                                                |
| Egfr  | epidermal growth factor receptor                            |
| Fgf18 | fibroblast growth factor 18                                 |
| Igf1  | insulin-like growth factor 1                                |
| Igf2  | insulin-like growth factor 2                                |
| Il6   | interleukin 6                                               |
| Irx3  | Iroquois related homeobox 3 (Drosophila)                    |
| Islr  | immunoglobulin superfamily containing leucine-rich repeat   |
| Jag1  | jagged 1                                                    |
| Lgr5  | leucine rich repeat containing G protein coupled receptor 5 |
| Rhou  | ras homolog gene family, member U                           |
| Sfrp2 | secreted frizzled-related protein 2                         |
| Stra6 | stimulated by retinoic acid gene 6                          |
| Wisp2 | WNT1 inducible signaling pathway protein 2                  |

**Genes affected by recombinant WNT3a in C3H10T1/2.**

**Induced.** Statistical analysis: 26 elements, expected 1.94,  $P = 3.529E-22$

|     |                |
|-----|----------------|
| Adm | adrenomedullin |
|-----|----------------|

|                                                                                   |                                                                                        |
|-----------------------------------------------------------------------------------|----------------------------------------------------------------------------------------|
| Axin2                                                                             | axin2                                                                                  |
| Ccdc80                                                                            | coiled-coil domain containing 80                                                       |
| Col8a1                                                                            | collagen, type VIII, alpha 1                                                           |
| Edn1                                                                              | endothelin 1                                                                           |
| Fjx1                                                                              | four jointed box 1 (Drosophila)                                                        |
| Gpm6b                                                                             | glycoprotein m6b                                                                       |
| Il33                                                                              | interleukin 33                                                                         |
| Inhba                                                                             | inhibin beta-A                                                                         |
| Lce1h                                                                             | late cornified envelope 1H                                                             |
| Lgr5                                                                              | leucine rich repeat containing G protein coupled receptor. 5                           |
| Lif                                                                               | leukemia inhibitory factor                                                             |
| Lmo7                                                                              | LIM domain only 7                                                                      |
| Myo10                                                                             | myosin X                                                                               |
| Ndnf                                                                              | neuron-derived neurotrophic factor                                                     |
| Nfatc4                                                                            | nuclear factor of activated T cells, cytoplasmic, calcineurin dependent 4              |
| Nkd2                                                                              | naked cuticle 2 homolog (Drosophila)                                                   |
| Nrp2                                                                              | neuropilin 2                                                                           |
| Prr5l                                                                             | proline rich 5 like                                                                    |
| Rhou                                                                              | ras homolog gene family, member U                                                      |
| Sema3c                                                                            | sema domain, immunoglobulin domain (Ig), short basic domain, secreted, (semaphorin) 3C |
| Spry1                                                                             | sprouty homolog 1 (Drosophila)                                                         |
| Timp3                                                                             | tissue inhibitor of metalloproteinase 3                                                |
| Tnfsf15                                                                           | tumor necrosis factor (ligand) superfamily, member 15                                  |
| Trabd2b                                                                           | TraB domain containing 2B                                                              |
| Wnt5a                                                                             | wingless-related MMTV integration site 5A                                              |
|                                                                                   |                                                                                        |
| <b>Repressed.</b> Statistical analysis: 9 elements, expected 0.500, P = 1.769E-09 |                                                                                        |
| Etv1                                                                              | ets variant gene 1                                                                     |
| Gprin3                                                                            | GPRIN family member 3                                                                  |
| Hgf                                                                               | hepatocyte growth factor                                                               |
| Ifi202b                                                                           | interferon activated gene 202B                                                         |
| Ripk2                                                                             | receptor (TNFRSF)-interacting serine-threonine kinase 2                                |
| S1pr1                                                                             | sphingosine-1-phosphate receptor 1                                                     |
| Spp1                                                                              | secreted phosphoprotein 1                                                              |
| Sytl2                                                                             | synaptotagmin-like 2                                                                   |
| Vip                                                                               | vasoactive intestinal polypeptide                                                      |

**Table S5. Lists of the probesets that are differentially expressed In C3H10T1/2 stimulated with WNT3a or vehicle with FDR 10%**

**List of genes induced by WNT3a stimulation in C3H10T1/2**

| probeset | gene id | gene symbol   | gene name                                                         | logFC       |
|----------|---------|---------------|-------------------------------------------------------------------|-------------|
| 10576386 | 69581   | Rhou          | ras homolog gene family, member U                                 | 1.641027215 |
| 10404783 | 13614   | Edn1          | endothelin 1                                                      | 3.483504073 |
| 10372503 | 14160   | Lgr5          | leucine rich repeat containing G protein coupled receptor 5       | 3.24276336  |
| 10382228 | 12006   | Axin2         | axin2                                                             | 3.871944035 |
| 10523021 | 54403   | Slc4a4        | solute carrier family 4 (anion exchanger), member 4               | 1.499687698 |
| 10538802 | 68169   | Ndnf          | neuron-derived neurotrophic factor                                | 3.407334502 |
| 10545707 | 11468   | Actg2         | actin, gamma 2, smooth muscle, enteric                            | 1.280873088 |
| 10491721 | 24063   | Spry1         | sprouty homolog 1 (Drosophila)                                    | 0.895440822 |
| 10595836 | 319859  | E030011O05Rik | RIKEN cDNA E030011O05 gene                                        | 1.005053862 |
| 10539907 | 24100   | Tpra1         | transmembrane protein, adipocyte associated 1                     | 1.078873958 |
| 10467425 | 20411   | Sorbs1        | sorbin and SH3 domain containing 1                                | 1.474897413 |
| 10501879 | 99526   | Usp53         | ubiquitin specific peptidase 53                                   | 1.108759513 |
| 10588283 | 270192  | Rab6b         | RAB6B, member RAS oncogene family                                 | 0.837243901 |
| 10453049 | 260409  | Cdc42ep3      | CDC42 effector protein (Rho GTPase binding) 3                     | 1.204164512 |
| 10505489 | 18491   | Pappa         | pregnancy-associated plasma protein A                             | 1.248437514 |
| 10423471 | 18163   | Ctnnd2        | catenin (cadherin associated protein), delta 2                    | 0.75521302  |
| 10395320 | 22160   | Twist1        | twist basic helix-loop-helix transcription factor 1               | 1.060775979 |
| 10513722 | 326623  | Tnfsf15       | tumor necrosis factor (ligand) superfamily, member 15             | 0.917312502 |
| 10428912 | 399603  | Fam84b        | family with sequence similarity 84, member B                      | 0.97566484  |
| 10405211 | 23882   | Gadd45g       | growth arrest and DNA-damage-inducible 45 gamma                   | 1.857243988 |
| 10474700 | 21825   | Thbs1         | thrombospondin 1                                                  | 0.865857609 |
| 10514338 | 723895  | Mir31         | microRNA 31                                                       | 0.870405769 |
| 10590623 | 80901   | Cxcr6         | chemokine (C-X-C motif) receptor 6                                | 4.106906529 |
| 10423293 | 17909   | Myo10         | myosin X                                                          | 0.738755164 |
| 10366746 | 320398  | Lrig3         | leucine-rich repeats and immunoglobulin-like domains 3            | 1.073467045 |
| 10507101 | 666048  | Trabd2b       | TraB domain containing 2B                                         | 0.702206199 |
| 10440091 | 12837   | Col8a1        | collagen, type VIII, alpha 1                                      | 1.362755501 |
| 10365845 | 13998   | Fgd6          | FYVE, RhoGEF and PH domain containing 6                           | 1.082642221 |
| 10485402 | 14221   | Fjx1          | four jointed box 1 (Drosophila)                                   | 1.73958185  |
| 10344263 | #N/A    | #N/A          | #N/A                                                              | 0.773869622 |
| 10505143 | #N/A    | #N/A          | #N/A                                                              | 0.65013357  |
| 10482500 | 74194   | Rnd3          | Rho family GTPase 3                                               | 0.860359345 |
| 10505120 | 242481  | Palm2         | paralemmin 2                                                      | 0.598300133 |
| 10403743 | 16323   | Inhba         | inhibin beta-A                                                    | 1.806638762 |
| 10472097 | 71409   | Fmn12         | formin-like 2                                                     | 1.202756285 |
| 10383684 | 16886   | Limk2         | LIM motif-containing protein kinase 2                             | 0.900351349 |
| 10503695 | 12014   | Bach2         | BTB and CNC homology 2                                            | 0.6696736   |
| 10513884 | 21885   | Tle1          | transducin-like enhancer of split 1, homolog of Drosophila E(spl) | 0.648070891 |



|          |        |         |                                                                                     |             |
|----------|--------|---------|-------------------------------------------------------------------------------------|-------------|
| 10483000 | 16420  | Itgb6   | integrin beta 6                                                                     | 1.060596108 |
| 10439710 | 208177 | Phldb2  | pleckstrin homology-like domain, family B, member 2                                 | 0.564281178 |
| 10340020 | #N/A   | #N/A    | #N/A                                                                                | 0.771932598 |
| 10464391 | 13797  | Emx2    | empty spiracles homeobox 2                                                          | 0.591930976 |
| 10356593 | 55927  | Hes6    | hairy and enhancer of split 6                                                       | 0.584662269 |
| 10595831 | 245007 | Zbtb38  | zinc finger and BTB domain containing 38                                            | 0.962463101 |
| 10509790 | 212647 | Aldh4a1 | aldehyde dehydrogenase 4 family, member A1                                          | 0.858332876 |
| 10385776 | 21414  | Tcf7    | transcription factor 7, T cell specific                                             | 1.232161435 |
| 10519998 | 74511  | Lrrc17  | leucine rich repeat containing 17                                                   | 1.239793014 |
| 10606654 | 331524 | Xkrx    | X Kell blood group precursor related X linked                                       | 1.073681241 |
| 10556297 | 11535  | Adm     | adrenomedullin                                                                      | 1.048774274 |
| 10502469 | 56376  | Pdim5   | PDZ and LIM domain 5                                                                | 0.555081614 |
| 10469404 | 12296  | Cacnb2  | calcium channel, voltage-dependent, beta 2 subunit                                  | 0.839127147 |
| 10435948 | 67896  | Ccdc80  | coiled-coil domain containing 80                                                    | 1.791906592 |
| 10365482 | 21859  | Timp3   | tissue inhibitor of metalloproteinase 3                                             | 0.668664667 |
| 10416371 | 67168  | Lpar6   | lysophosphatidic acid receptor 6                                                    | 0.704915884 |
| 10499932 | 67718  | Lce1h   | late cornified envelope 1H                                                          | 1.510215917 |
| 10536494 | 12390  | Cav2    | caveolin 2                                                                          | 0.778948943 |
| 10444890 | 15937  | Ier3    | immediate early response 3                                                          | 1.239659688 |
| 10603151 | 14758  | Gpm6b   | glycoprotein m6b                                                                    | 1.746606962 |
| 10507099 | 666048 | Trabd2b | TraB domain containing 2B                                                           | 0.711732624 |
| 10423548 | 15529  | Sdc2    | syndecan 2                                                                          | 0.783301512 |
| 10383853 | 75828  | Hormad2 | HORMA domain containing 2                                                           | 0.485151649 |
| 10552380 | 243958 | Siglecg | sialic acid binding Ig-like lectin G                                                | 0.522903983 |
| 10374464 | 114716 | Spred2  | sprouty-related, EVH1 domain containing 2                                           | 0.620126031 |
| 10362201 | 14219  | Ctgf    | connective tissue growth factor                                                     | 1.183846489 |
| 10413482 | 22418  | Wnt5a   | wingless-related MMTV integration site 5A                                           | 0.802280903 |
| 10416800 | 380928 | Lmo7    | LIM domain only 7                                                                   | 1.132327932 |
| 10570236 | 17207  | Mcf2l   | mcf.2 transforming sequence-like                                                    | 0.711443991 |
| 10365230 | 21665  | Tdg     | thymine DNA glycosylase                                                             | 0.484349446 |
| 10431974 | 223864 | Rapgef3 | Rap guanine nucleotide exchange factor (GEF) 3                                      | 0.615806413 |
| 10393904 | 77583  | Notum   | notum pectinacetylerase homolog (Drosophila)                                        | 1.084416872 |
| 10343823 | #N/A   | #N/A    | #N/A                                                                                | 0.543471232 |
| 10415396 | 73181  | Nfatc4  | nuclear factor of activated T cells, cytoplasmic, calcineurin dependent 4           | 0.479474791 |
| 10394488 | 17182  | Matn3   | matrilin 3                                                                          | 0.653485502 |
| 10368883 | 21665  | Tdg     | thymine DNA glycosylase                                                             | 0.48754414  |
| 10467068 | 208449 | Sgms1   | sphingomyelin synthase 1                                                            | 1.106900018 |
| 10534927 | 231805 | Pilra   | paired immunoglobulin-like type 2 receptor alpha                                    | 1.050969064 |
| 10580807 | 16582  | Kifc3   | kinesin family member C3                                                            | 0.401536362 |
| 10489343 | 30963  | Ptpla   | protein tyrosine phosphatase-like (proline instead of catalytic arginine), member a | 0.666305267 |
| 10607225 | 210297 | Lrch2   | leucine-rich repeats and calponin homology (CH) domain containing 2                 | 1.068684412 |
| 10571312 | 319520 | Dusp4   | dual specificity phosphatase 4                                                      | 1.76248882  |
| 10395328 | 217463 | Snx13   | sorting nexin 13                                                                    | 0.451023979 |
| 10462102 | 72351  | Ptar1   | protein prenyltransferase alpha subunit repeat containing 1                         | 0.748049953 |
| 10346843 | 18187  | Nrp2    | neuropilin 2                                                                        | 0.741766494 |

|          |        |               |                                                                                        |             |
|----------|--------|---------------|----------------------------------------------------------------------------------------|-------------|
| 10340228 | #N/A   | #N/A          | #N/A                                                                                   | 1.133415014 |
| 10454514 | 225341 | Lims2         | LIM and senescent cell antigen like domains 2                                          | 1.96864688  |
| 10340902 | #N/A   | #N/A          | #N/A                                                                                   | 0.633929527 |
| 10595840 | 235534 | Acpl2         | acid phosphatase-like 2                                                                | 1.093167273 |
| 10355312 | 22779  | Ikzf2         | IKAROS family zinc finger 2                                                            | 1.12257754  |
| 10514133 | 69863  | Ttc39b        | tetratricopeptide repeat domain 39B                                                    | 0.652306631 |
| 10480121 | 66960  | Fam188a       | family with sequence similarity 188, member A                                          | 0.587318839 |
| 10472436 | 26877  | B3galt1       | UDP-Gal:betaGlcNAc beta 1,3-galactosyltransferase, polypeptide 1                       | 0.806730248 |
| 10569646 | 12443  | Ccnd1         | cyclin D1                                                                              | 0.390173068 |
| 10579744 | 16795  | Large         | like-glycosyltransferase                                                               | 0.573510038 |
| 10489299 | #N/A   | #N/A          | #N/A                                                                                   | 0.449187384 |
| 10519886 | 20348  | Sema3c        | sema domain, immunoglobulin domain (Ig), short basic domain, secreted, (semaphorin) 3C | 1.98059327  |
| 10437151 | 16516  | Kcnj15        | potassium inwardly-rectifying channel, subfamily J, member 15                          | 0.470663457 |
| 10521602 | 231207 | Cpeb2         | cytoplasmic polyadenylation element binding protein 2                                  | 0.638540996 |
| 10382341 | 20606  | Sstr2         | somatostatin receptor 2                                                                | 0.702350037 |
| 10504234 | 22249  | Unc13b        | unc-13 homolog B (C. elegans)                                                          | 0.474665843 |
| 10462442 | 77125  | Il33          | interleukin 33                                                                         | 2.217156284 |
| 10514128 | 69863  | Ttc39b        | tetratricopeptide repeat domain 39B                                                    | 0.628266548 |
| 10430871 | 21665  | Tdg           | thymine DNA glycosylase                                                                | 0.481487873 |
| 10365729 | 237459 | Cdk17         | cyclin-dependent kinase 17                                                             | 0.505964246 |
| 10347792 | #N/A   | #N/A          | #N/A                                                                                   | 0.768853034 |
| 10400095 | 15982  | Ifrd1         | interferon-related developmental regulator 1                                           | 0.682085005 |
| 10397002 | 217692 | Sipa1l1       | signal-induced proliferation-associated 1 like 1                                       | 0.688066899 |
| 10464997 | #N/A   | #N/A          | #N/A                                                                                   | 0.420345812 |
| 10485378 | 72446  | Prr5l         | proline rich 5 like                                                                    | 1.419482127 |
| 10491279 | 18759  | Prkci         | protein kinase C, iota                                                                 | 0.519391924 |
| 10410547 | 72293  | Nkd2          | naked cuticle 2 homolog (Drosophila)                                                   | 2.552372174 |
| 10583870 | 73230  | Bmper         | BMP-binding endothelial regulator                                                      | 0.982955802 |
| 10428407 | 239408 | Tmem74        | transmembrane protein 74                                                               | 1.541569072 |
| 10588263 | 24059  | Slco2a1       | solute carrier organic anion transporter family, member 2a1                            | 0.613998748 |
| 10338444 | #N/A   | #N/A          | #N/A                                                                                   | 0.484678229 |
| 10390897 | 69664  | Krtap1-5      | keratin associated protein 1-5                                                         | 0.708592102 |
| 10548105 | 12444  | Ccnd2         | cyclin D2                                                                              | 0.376320423 |
| 10406823 | #N/A   | #N/A          | #N/A                                                                                   | 1.964592978 |
| 10340282 | #N/A   | #N/A          | #N/A                                                                                   | 0.406941245 |
| 10373918 | 16878  | Lif           | leukemia inhibitory factor                                                             | 1.135376503 |
| 10504294 | 100213 | Rusc2         | RUN and SH3 domain containing 2                                                        | 0.948096467 |
| 10428918 | 320469 | 9930014A18Rik | RIKEN cDNA 9930014A18 gene                                                             | 0.754593782 |
| 10455483 | 240255 | Ythdc2        | YTH domain containing 2                                                                | 0.370942036 |
| 10542822 | 66532  | Rep15         | RAB15 effector protein                                                                 | 0.467981299 |
| 10350123 | 93689  | Lmod1         | leiomodoin 1 (smooth muscle)                                                           | 1.402734515 |
| 10515994 | 69780  | Smap2         | stromal membrane-associated GTPase-activating protein 2                                | 0.407904498 |
| 10496715 | 229937 | Znhit6        | zinc finger, HIT type 6                                                                | 0.686912628 |
| 10494655 | 242109 | Zfp697        | zinc finger protein 697                                                                | 1.162987218 |

## List of genes repressed by WNT3a stimulation in C3H10T1/2

| probeset | gene id | gene symbol | gene name                                                             | logFC        |
|----------|---------|-------------|-----------------------------------------------------------------------|--------------|
| 10501586 | 13609   | S1pr1       | sphingosine-1-phosphate receptor 1                                    | -1.432545485 |
| 10499160 | 12479   | Cd1d1       | CD1d1 antigen                                                         | -1.227488614 |
| 10438769 | 12737   | Cldn1       | claudin 1                                                             | -2.609045004 |
| 10475866 | 12125   | Bcl2l11     | BCL2-like 11 (apoptosis facilitator)                                  | -0.91591272  |
| 10501608 | 22329   | Vcam1       | vascular cell adhesion molecule 1                                     | -0.83912278  |
| 10474419 | 107515  | Lgr4        | leucine-rich repeat-containing G protein-coupled receptor 4           | -1.45617322  |
| 10359571 | 14261   | Fmo1        | flavin containing monooxygenase 1                                     | -1.011628655 |
| 10506701 | 230587  | Glis1       | GLIS family zinc finger 1                                             | -1.464867264 |
| 10400989 | 238271  | Kcnh5       | potassium voltage-gated channel, subfamily H (eag-related), member 5  | -1.145414686 |
| 10381934 | 77097   | Tanc2       | tetratricopeptide repeat, ankyrin repeat and coiled-coil containing 2 | -0.938476816 |
| 10341539 | #N/A    | #N/A        | #N/A                                                                  | -1.197057899 |
| 10558410 | 19267   | Ptpre       | protein tyrosine phosphatase, receptor type, E                        | -0.876068713 |
| 10363970 | 76877   | Rab36       | RAB36, member RAS oncogene family                                     | -0.990833695 |
| 10517287 | 230815  | Man1c1      | mannosidase, alpha, class 1C, member 1                                | -0.710814207 |
| 10516484 | 14620   | Gjb3        | gap junction protein, beta 3                                          | -0.944842654 |
| 10475643 | 14178   | Fgf7        | fibroblast growth factor 7                                            | -1.346921682 |
| 10381809 | 16416   | Itgb3       | integrin beta 3                                                       | -0.921519708 |
| 10427816 | 68070   | Pdzd2       | PDZ domain containing 2                                               | -1.294022431 |
| 10436945 | 53881   | Slc5a3      | solute carrier family 5 (inositol transporters), member 3             | -1.03861787  |
| 10363224 | 12140   | Fabp7       | fatty acid binding protein 7, brain                                   | -0.881341912 |
| 10496373 | 73284   | Ddit4l      | DNA-damage-inducible transcript 4-like                                | -0.647199401 |
| 10422962 | 68646   | Nadk2       | NAD kinase 2, mitochondrial                                           | -1.724563431 |
| 10461408 | 74760   | Rab3il1     | RAB3A interacting protein (rabin3)-like 1                             | -0.927779544 |
| 10595081 | 26944   | Tinag       | tubulointerstitial nephritis antigen                                  | -0.899901791 |
| 10464917 | 12794   | Cnih2       | cornichon homolog 2 (Drosophila)                                      | -0.608190583 |
| 10343800 | #N/A    | #N/A        | #N/A                                                                  | -0.572317431 |
| 10436941 | 121022  | Mrps6       | mitochondrial ribosomal protein S6                                    | -0.545371979 |
| 10342190 | #N/A    | #N/A        | #N/A                                                                  | -0.957694464 |
| 10428376 | 11600   | Angpt1      | angiopoietin 1                                                        | -2.236153488 |
| 10344136 | #N/A    | #N/A        | #N/A                                                                  | -1.134216516 |
| 10394555 | 105014  | Rdh14       | retinol dehydrogenase 14 (all-trans and 9-cis)                        | -0.585462163 |
| 10574027 | 17748   | Mt1         | metallothionein 1                                                     | -0.984846311 |
| 10406934 | 14009   | Etv1        | ets variant gene 1                                                    | -1.179455973 |
| 10473058 | 99031   | Osbpl6      | oxysterol binding protein-like 6                                      | -0.6355796   |
| 10359861 | 66447   | Mgst3       | microsomal glutathione S-transferase 3                                | -1.16231913  |
| 10604528 | 171170  | Mbnl3       | muscleblind-like 3 (Drosophila)                                       | -0.549411513 |
| 10543319 | 27999   | Fam3c       | family with sequence similarity 3, member C                           | -0.676474084 |
| 10519857 | 15234   | Hgf         | hepatocyte growth factor                                              | -3.504004952 |
| 10472162 | 14571   | Gpd2        | glycerol phosphate dehydrogenase 2, mitochondrial                     | -0.515441543 |
| 10339037 | #N/A    | #N/A        | #N/A                                                                  | -0.658751947 |
| 10432032 | 22337   | Vdr         | vitamin D receptor                                                    | -1.145161218 |

|          |        |               |                                                                       |              |
|----------|--------|---------------|-----------------------------------------------------------------------|--------------|
| 10446763 | 77889  | Lbh           | limb-bud and heart                                                    | -1.240320279 |
| 10557326 | 16190  | Il4ra         | interleukin 4 receptor, alpha                                         | -0.525200204 |
| 10381939 | 77097  | Tanc2         | tetratricopeptide repeat, ankyrin repeat and coiled-coil containing 2 | -0.722901696 |
| 10357249 | 68428  | Steap3        | STEAP family member 3                                                 | -0.666789366 |
| 10523717 | 20750  | Spp1          | secreted phosphoprotein 1                                             | -1.813372481 |
| 10586017 | 72565  | Uaca          | uveal autoantigen with coiled-coil domains and ankyrin repeats        | -0.512625343 |
| 10492590 | 242083 | Ppm1l         | protein phosphatase 1 (formerly 2C)-like                              | -0.576823834 |
| 10574023 | 17750  | Mt2           | metallothionein 2                                                     | -1.535225726 |
| 10348354 | 394434 | Ugt1a9        | UDP glucuronosyltransferase 1 family, polypeptide A9                  | -1.049038235 |
| 10481592 | 13429  | Dnm1          | dynamain 1                                                            | -0.811608344 |
| 10357280 | 72999  | Insig2        | insulin induced gene 2                                                | -0.667615729 |
| 10543959 | 19242  | Ptn           | pleiotrophin                                                          | -1.971669517 |
| 10595702 | 68861  | 1190002N15Rik | RIKEN cDNA 1190002N15 gene                                            | -0.734591609 |
| 10604961 | 14396  | Gabra3        | gamma-aminobutyric acid (GABA) A receptor, subunit alpha 3            | -0.55936884  |
| 10340630 | #N/A   | #N/A          | #N/A                                                                  | -0.472525782 |
| 10342116 | #N/A   | #N/A          | #N/A                                                                  | -0.659994066 |
| 10471424 | 98952  | Fam102a       | family with sequence similarity 102, member A                         | -0.619932375 |
| 10594802 | 235461 | Fam63b        | family with sequence similarity 63, member B                          | -0.719956526 |
| 10359181 | 30935  | Tor3a         | torsin family 3, member A                                             | -0.537597873 |
| 10410115 | 66129  | Aaed1         | AhpC/TSA antioxidant enzyme domain containing 1                       | -0.545190244 |
| 10604620 | 78755  | Fam122b       | family with sequence similarity 122, member B                         | -1.554404439 |
| 10420877 | 71988  | Esco2         | establishment of cohesion 1 homolog 2 ( <i>S. cerevisiae</i> )        | -0.49850711  |
| 10345046 | 71877  | Efhc1         | EF-hand domain (C-terminal) containing 1                              | -0.610242441 |
| 10344390 | #N/A   | #N/A          | #N/A                                                                  | -0.829303474 |
| 10480699 | 83768  | Dpp7          | dipeptidylpeptidase 7                                                 | -0.465268653 |
| 10605303 | 69537  | Dnase1l1      | deoxyribonuclease 1-like 1                                            | -0.724636292 |
| 10505623 | 52829  | Lurap1l       | leucine rich adaptor protein 1-like                                   | -0.479795425 |
| 10474437 | 68201  | Ccdc34        | coiled-coil domain containing 34                                      | -0.979109272 |
| 10601771 | 78248  | Armcx1        | armadillo repeat containing, X-linked 1                               | -0.703159788 |
| 10339478 | #N/A   | #N/A          | #N/A                                                                  | -0.818211451 |
| 10409541 | #N/A   | #N/A          | #N/A                                                                  | -0.505820641 |
| 10406663 | 11881  | Arsb          | arylsulfatase B                                                       | -0.514336241 |
| 10492699 | 229445 | Ctso          | cathepsin O                                                           | -0.976009712 |
| 10419034 | 70045  | 2610528A11Rik | RIKEN cDNA 2610528A11 gene                                            | -0.821502601 |
| 10547217 | 78752  | Csgalnact2    | chondroitin sulfate N-acetylgalactosaminyltransferase 2               | -0.460907831 |
| 10441902 | 64074  | Smoc2         | SPARC related modular calcium binding 2                               | -0.914137839 |
| 10573979 | 14681  | Gnao1         | guanine nucleotide binding protein, alpha O                           | -0.57046357  |
| 10360398 | 26388  | Ifi202b       | interferon activated gene 202B                                        | -1.171843199 |
| 10480714 | 227620 | Uap1l1        | UDP-N-acetylglucosamine pyrophosphorylase 1-like 1                    | -0.726651112 |
| 10549276 | 79362  | Bhlhe41       | basic helix-loop-helix family, member e41                             | -1.002373115 |
| 10394534 | 23967  | Osr1          | odd-skipped related 1 ( <i>Drosophila</i> )                           | -0.827524915 |
| 10422227 | 24064  | Spry2         | sprouty homolog 2 ( <i>Drosophila</i> )                               | -0.575776742 |
| 10382300 | 26399  | Map2k6        | mitogen-activated protein kinase kinase 6                             | -1.463835383 |
| 10556528 | 18576  | Pde3b         | phosphodiesterase 3B, cGMP-inhibited                                  | -0.878412051 |
| 10462922 | 74055  | Plce1         | phospholipase C, epsilon 1                                            | -0.886234791 |
| 10581538 | 18104  | Nqo1          | NAD(P)H dehydrogenase, quinone 1                                      | -0.864772661 |

|          |        |          |                                                                                               |              |
|----------|--------|----------|-----------------------------------------------------------------------------------------------|--------------|
| 10409261 | 68203  | Diras2   | DIRAS family, GTP-binding RAS-like 2                                                          | -1.351855835 |
| 10511703 | 192656 | Ripk2    | receptor (TNFRSF)-interacting serine-threonine kinase 2                                       | -0.559645354 |
| 10400607 | 320772 | Mdga2    | MAM domain containing glycosylphosphatidylinositol anchor 2                                   | -1.397032241 |
| 10423599 | 17181  | Matn2    | matrilin 2                                                                                    | -1.057287363 |
| 10605357 | 210710 | Gab3     | growth factor receptor bound protein 2-associated protein 3                                   | -0.471316972 |
| 10473312 | 241520 | Fam171b  | family with sequence similarity 171, member B                                                 | -0.825332794 |
| 10452419 | 13640  | Efna5    | ephrin A5                                                                                     | -0.704618071 |
| 10442643 | 79059  | Nme3     | NME/NM23 nucleoside diphosphate kinase 3                                                      | -0.752753519 |
| 10497399 | 18583  | Pde7a    | phosphodiesterase 7A                                                                          | -0.477900531 |
| 10375751 | 216725 | Adamts2  | a disintegrin-like and metallopeptidase (reprolysin type) with thrombospondin type 1 motif, 2 | -0.553545382 |
| 10563191 | 68667  | Trpm4    | transient receptor potential cation channel, subfamily M, member 4                            | -0.790448689 |
| 10484283 | 18573  | Pde1a    | phosphodiesterase 1A, calmodulin-dependent                                                    | -0.788394677 |
| 10595148 | 14858  | Gsta2    | glutathione S-transferase, alpha 2 (Yc2)                                                      | -0.467678163 |
| 10549842 | 384763 | Zfp667   | zinc finger protein 667                                                                       | -0.410201157 |
| 10346882 | 23792  | Adam23   | a disintegrin and metallopeptidase domain 23                                                  | -1.138730275 |
| 10474181 | 99382  | Abtb2    | ankyrin repeat and BTB (POZ) domain containing 2                                              | -0.643293564 |
| 10359908 | 19736  | Rgs4     | regulator of G-protein signaling 4                                                            | -2.502309687 |
| 10429160 | 20442  | St3gal1  | ST3 beta-galactoside alpha-2,3-sialyltransferase 1                                            | -0.991822593 |
| 10496338 | 19055  | Ppp3ca   | protein phosphatase 3, catalytic subunit, alpha isoform                                       | -0.908012224 |
| 10355147 | 67099  | Mettl21a | methyltransferase like 21A                                                                    | -0.591425994 |
| 10470446 | 20181  | Rxra     | retinoid X receptor alpha                                                                     | -0.404090624 |
| 10406672 | 11881  | Arsb     | arylsulfatase B                                                                               | -0.442287294 |
| 10545065 | 243385 | Gprn3    | GPRIN family member 3                                                                         | -2.78988839  |
| 10595560 | 76365  | Tbx18    | T-box18                                                                                       | -0.444388177 |
| 10344421 | #N/A   | #N/A     | #N/A                                                                                          | -1.051811878 |
| 10360391 | 15950  | Ifi203   | interferon activated gene 203                                                                 | -1.526187828 |
| 10369531 | 70423  | Tspan15  | tetraspanin 15                                                                                | -0.531196986 |
| 10343210 | #N/A   | #N/A     | #N/A                                                                                          | -0.732576481 |
| 10451481 | 210982 | Gltscr1l | GLTSCR1-like                                                                                  | -0.38577015  |
| 10571362 | 621080 | AI429214 | expressed sequence AI429214                                                                   | -0.48574057  |
| 10419566 | 11731  | Ang2     | angiogenin, ribonuclease A family, member 2                                                   | -0.538965562 |
| 10526943 | 80290  | Gpr146   | G protein-coupled receptor 146                                                                | -0.65743575  |
| 10523674 | 74167  | Nudt9    | nudix (nucleoside diphosphate linked moiety X)-type motif 9                                   | -0.552703954 |
| 10341524 | #N/A   | #N/A     | #N/A                                                                                          | -1.127247342 |
| 10554926 | 66365  | Ccdc90b  | coiled-coil domain containing 90B                                                             | -0.791386485 |
| 10339933 | #N/A   | #N/A     | #N/A                                                                                          | -0.829777663 |
| 10454831 | 67869  | Paip2    | polyadenylate-binding protein-interacting protein 2                                           | -0.420568493 |
| 10573115 | 330812 | Rnf150   | ring finger protein 150                                                                       | -1.260240872 |
| 10427015 | 11479  | Acvr1b   | activin A receptor, type 1B                                                                   | -0.409559084 |
| 10338249 | #N/A   | #N/A     | #N/A                                                                                          | -0.445716871 |
| 10461251 | 68852  | Lrrn4cl  | LRRN4 C-terminal like                                                                         | -0.606937258 |
| 10490872 | 71710  | Lrrcc1   | leucine rich repeat and coiled-coil domain containing 1                                       | -1.202330905 |
| 10451123 | 63959  | Slc29a1  | solute carrier family 29 (nucleoside transporters), member 1                                  | -0.513680747 |
| 10457357 | 75739  | Mpp7     | membrane protein, palmitoylated 7 (MAGUK p55 subfamily member 7)                              | -0.444268039 |
| 10499045 | 80890  | Trim2    | tripartite motif-containing 2                                                                 | -0.469394108 |

|          |        |               |                                                                                                                                 |              |
|----------|--------|---------------|---------------------------------------------------------------------------------------------------------------------------------|--------------|
| 10607499 | 18675  | Phex          | phosphate regulating gene with homologies to endopeptidases on the X chromosome (hypophosphatemia, vitamin D resistant rickets) | -1.327727836 |
| 10460157 | 12894  | Cpt1a         | carnitine palmitoyltransferase 1a, liver                                                                                        | -0.556798944 |
| 10422598 | 20363  | Sepp1         | selenoprotein P, plasma, 1                                                                                                      | -1.611077988 |
| 10339475 | #N/A   | #N/A          | #N/A                                                                                                                            | -0.401893307 |
| 10343129 | #N/A   | #N/A          | #N/A                                                                                                                            | -0.673816199 |
| 10554863 | 83671  | Syt12         | synaptotagmin-like 2                                                                                                            | -1.02555281  |
| 10607486 | 211612 | Ptchd1        | patched domain containing 1                                                                                                     | -0.705110082 |
| 10338195 | #N/A   | #N/A          | #N/A                                                                                                                            | -0.563188236 |
| 10442904 | 72106  | Jmjd8         | jumonji domain containing 8                                                                                                     | -0.365283378 |
| 10519607 | 652925 | Tmem243       | transmembrane protein 243, mitochondrial                                                                                        | -0.530149564 |
| 10551080 | 71722  | Cic           | capicua homolog (Drosophila)                                                                                                    | -0.367104064 |
| 10500736 | 229658 | Vangl1        | vang-like 1 (van gogh, Drosophila)                                                                                              | -0.526265821 |
| 10544062 | 330286 | D630045J12Rik | RIKEN cDNA D630045J12 gene                                                                                                      | -0.388892616 |
| 10367582 | 22353  | Vip           | vasoactive intestinal polypeptide                                                                                               | -2.010511814 |
| 10415413 | 277154 | Nynrin        | NYN domain and retroviral integrase containing                                                                                  | -0.352025492 |
| 10443940 | 77652  | Zfp955a       | zinc finger protein 955A                                                                                                        | -0.398141809 |

**Table S6. Lists of the probesets that are differentially expressed In STO infected with SS18-SSX1 or an empty vector, with FDR 15% .**

| List of genes induced by SYT-SSX1 expression in STO |         |               |                                                                    |         |
|-----------------------------------------------------|---------|---------------|--------------------------------------------------------------------|---------|
| probeset                                            | gene id | gene symbol   | gene name                                                          | logFC   |
| H3011D02                                            | 22333   | Vdac1         | voltage-dependent anion channel 1                                  | 1.74412 |
| H3126E02                                            | 22333   | Vdac1         | voltage-dependent anion channel 1                                  | 1.88818 |
| H3081E04                                            | 233545  | 2210018M11Rik | RIKEN cDNA 2210018M11 gene                                         | 0.83796 |
| H3020B01                                            | #N/A    | #N/A          | #N/A                                                               | 1.28382 |
| H3106C06                                            | 14677   | Gnai1         | guanine nucleotide binding protein (G protein), alpha inhibiting 1 | 0.72684 |
| H3080D12                                            | 22384   | Eif4h         | eukaryotic translation initiation factor 4H                        | 0.78766 |
| H3015B01                                            | 16600   | Klf4          | Kruppel-like factor 4 (gut)                                        | 0.6276  |
| H3005A09                                            | 14629   | Gclc          | glutamate-cysteine ligase, catalytic subunit                       | 0.7247  |
| H3057D02                                            | 68097   | Dynll2        | dynein light chain LC8-type 2                                      | 1.16374 |
| H3092D03                                            | 433864  | Gm1040        | gene model 1040, (NCBI)                                            | 0.6513  |
| H3007A07                                            | 16956   | Lpl           | lipoprotein lipase                                                 | 0.56444 |
| H3126B11                                            | 331563  | C130006E23    | hypothetical protein C130006E23                                    | 0.88512 |
| H3052B06                                            | 18669   | Abcb1b        | ATP-binding cassette, sub-family B (MDR/TAP), member 1B            | 0.63238 |
| H3114D03                                            | 17158   | Man2a1        | mannosidase 2, alpha 1                                             | 0.65246 |
| H3112D02                                            | 67458   | Ergic1        | endoplasmic reticulum-golgi intermediate compartment (ERGIC) 1     | 0.76596 |
| H3104C02                                            | 56353   | Rybp          | RING1 and YY1 binding protein                                      | 0.64246 |
| H3109E08                                            | 382985  | Rrm2b         | ribonucleotide reductase M2 B (TP53 inducible)                     | 0.72178 |
| H3098B01                                            | #N/A    | #N/A          | #N/A                                                               | 0.60822 |
| H3011B06                                            | 233726  | Ipo7          | importin 7                                                         | 0.90732 |
| H3140C06                                            | 234736  | Rfwd3         | ring finger and WD repeat domain 3                                 | 0.539   |
| H3026B04                                            | 231327  | Ppat          | phosphoribosyl pyrophosphate amidotransferase                      | 0.5218  |
| H3106H09                                            | #N/A    | #N/A          | #N/A                                                               | 0.57418 |
| H3118C07                                            | 15510   | Hspd1         | heat shock protein 1 (chaperonin)                                  | 0.55606 |
| H3129G09                                            | 22223   | Uch11         | ubiquitin carboxy-terminal hydrolase L1                            | 0.5236  |
| H3096B01                                            | #N/A    | #N/A          | #N/A                                                               | 0.69562 |
| H3007B10                                            | 13681   | Eif4a1        | eukaryotic translation initiation factor 4A1                       | 0.65714 |
| H3034E02                                            | 19139   | Prps1         | phosphoribosyl pyrophosphate synthetase 1                          | 0.56328 |
| H3037D03                                            | 74467   | Pus10         | pseudouridylyl synthase 10                                         | 0.62172 |
| H3083B05                                            | 14105   | Fusip1        | FUS interacting protein (serine-arginine rich) 1                   | 0.46958 |
| H3132F05                                            | 50887   | Nsbp1         | nucleosome binding protein 1                                       | 0.55454 |
| H3040C04                                            | 67103   | Ptgr1         | prostaglandin reductase 1                                          | 0.54018 |
| H3119C08                                            | 16562   | Kif1c         | kinesin family member 1C                                           | 0.48056 |
| H3041A09                                            | 16648   | Kpna3         | karyopherin (importin) alpha 3                                     | 0.4892  |
| H3151A04                                            | 16403   | Itga6         | integrin alpha 6                                                   | 0.59874 |
| H3106B12                                            | 434459  | EG434459      | predicted gene, EG434459                                           | 0.5105  |
| H3124E04                                            | 20315   | Cxcl12        | chemokine (C-X-C motif) ligand 12                                  | 0.45446 |
| H3099A04                                            | 494504  | Apcdd1        | adenomatosis polyposis coli down-regulated 1                       | 0.61182 |

|          |        |               |                                                                 |         |
|----------|--------|---------------|-----------------------------------------------------------------|---------|
| H3074D09 | 13495  | Drg2          | developmentally regulated GTP binding protein 2                 | 0.48316 |
| H3057D01 | 20684  | Sp100         | nuclear antigen Sp100                                           | 0.61928 |
| H3029H08 | 52118  | Pvr           | poliovirus receptor                                             | 0.70678 |
| H3016A09 | 118445 | Klf16         | Kruppel-like factor 16                                          | 0.50694 |
| H3075H07 | 75221  | Dpp3          | dipeptidylpeptidase 3                                           | 0.62414 |
| H3102E05 | #N/A   | #N/A          | #N/A                                                            | 0.5941  |
| H3015E11 | 54132  | Pdlim1        | PDZ and LIM domain 1 (elfin)                                    | 0.49018 |
| H3044B12 | 108705 | Pttg1ip       | pituitary tumor-transforming 1 interacting protein              | 0.5096  |
| H3150G02 | 18141  | Nup50         | nucleoporin 50                                                  | 0.48056 |
| H3151G02 | 67811  | Poldip2       | polymerase (DNA-directed), delta interacting protein 2          | 0.53098 |
| H3105E05 | 66645  | Pspc1         | paraspeckle protein 1                                           | 0.52016 |
| H3146E06 | 84004  | Mcam          | melanoma cell adhesion molecule                                 | 0.54394 |
| H3159E05 | 78929  | Polr3h        | polymerase (RNA) III (DNA directed) polypeptide H               | 0.4553  |
| H3012G05 | 97820  | 4833439L19Rik | RIKEN cDNA 4833439L19 gene                                      | 0.47602 |
| H3039G07 | #N/A   | #N/A          | #N/A                                                            | 0.47482 |
| H3015B12 | 70601  | Ecd           | ecdysoneless homolog (Drosophila)                               | 0.45654 |
| H3084E10 | 53414  | Bysl          | bystin-like                                                     | 0.49806 |
| H3024F01 | 14725  | Lrp2          | low density lipoprotein receptor-related protein 2              | 0.50046 |
| H3083C01 | 71819  | Kif23         | kinesin family member 23                                        | 0.47126 |
| H3100G07 | 78394  | Ddx52         | DEAD (Asp-Glu-Ala-Asp) box polypeptide 52                       | 0.42928 |
| H3134A02 | 56047  | Msln          | mesothelin                                                      | 0.48166 |
| H3107A12 | 70465  | Wdr77         | WD repeat domain 77                                             | 0.46246 |
| H3027D05 | 17069  | Ly6e          | lymphocyte antigen 6 complex, locus E                           | 0.50858 |
| H3017D12 | 70350  | Basp1         | brain abundant, membrane attached signal protein 1              | 0.4695  |
| H3100C04 | 233726 | Ipo7          | importin 7                                                      | 0.72446 |
| H3085G03 | 13057  | Cyba          | cytochrome b-245, alpha polypeptide                             | 0.50044 |
| H3088D05 | 13518  | Dst           | dystonin                                                        | 0.46774 |
| H3007B09 | 13681  | Eif4a1        | eukaryotic translation initiation factor 4A1                    | 0.69558 |
| H3146F01 | 11848  | Rhoa          | ras homolog gene family, member A                               | 0.51868 |
| H3024G02 | 19139  | Prps1         | phosphoribosyl pyrophosphate synthetase 1                       | 0.41252 |
| H3055G09 | 235534 | Acpl2         | acid phosphatase-like 2                                         | 0.51062 |
| H3021F06 | 319583 | Lig4          | ligase IV, DNA, ATP-dependent                                   | 0.45072 |
| H3005D07 | #N/A   | #N/A          | #N/A                                                            | 0.58514 |
| H3033G12 | 319638 | Nt5dc1        | 5'-nucleotidase domain containing 1                             | 0.4134  |
| H3025E08 | 50497  | Hspa14        | heat shock protein 14                                           | 0.4197  |
| H3113E07 | 66922  | Rras2         | related RAS viral (r-ras) oncogene homolog 2                    | 0.47008 |
| H3138F10 | 18201  | Nsmaf         | neutral sphingomyelinase (N-SMase) activation associated factor | 0.42574 |
| H3043E11 | 66926  | Trmt6         | tRNA methyltransferase 6 homolog ( <i>S. cerevisiae</i> )       | 0.45806 |
| H3015A04 | 16906  | Lmnb1         | lamin B1                                                        | 0.54658 |
| H3007B11 | 13681  | Eif4a1        | eukaryotic translation initiation factor 4A1                    | 0.61338 |
| H3131D05 | 53945  | Slc40a1       | solute carrier family 40 (iron-regulated transporter), member 1 | 0.44786 |
| H3105E04 | 66645  | Pspc1         | paraspeckle protein 1                                           | 0.4469  |
| H3002G11 | 14629  | Gclc          | glutamate-cysteine ligase, catalytic subunit                    | 0.41144 |
| H3023C10 | 19291  | Purb          | purine rich element binding protein B                           | 0.40584 |
| H3059G09 | 408028 | 9230115E21Rik | RIKEN cDNA 9230115E21 gene                                      | 0.87982 |



|          |        |               |                                                                                      |         |
|----------|--------|---------------|--------------------------------------------------------------------------------------|---------|
| H3134E11 | 70693  | Gpr125        | G protein-coupled receptor 125                                                       | 0.39938 |
| H3052F08 | 75430  | 3200002M19Rik | RIKEN cDNA 3200002M19 gene                                                           | 0.41928 |
| H3026A01 | 56348  | Hsd17b12      | hydroxysteroid (17-beta) dehydrogenase 12                                            | 1.13186 |
| H3053H10 | 239405 | Rspo2         | R-spondin 2 homolog ( <i>Xenopus laevis</i> )                                        | 0.69374 |
| H3035B12 | 433956 | Heatr2        | HEAT repeat containing 2                                                             | 0.44374 |
| H3128F08 | 68705  | Gtf2f2        | general transcription factor IIF, polypeptide 2                                      | 0.40918 |
| H3128D11 | 432940 | Fam105b       | family with sequence similarity 105, member B                                        | 0.47188 |
| H3040C06 | 20425  | Shmt1         | serine hydroxymethyltransferase 1 (soluble)                                          | 0.41944 |
| H3029C03 | 27205  | Podxl         | podocalyxin-like                                                                     | 0.50756 |
| H3092D07 | 70408  | Polr3f        | polymerase (RNA) III (DNA directed) polypeptide F                                    | 0.45456 |
| H3006G07 | 77573  | Vps33a        | vacuolar protein sorting 33A (yeast)                                                 | 0.40082 |
| H3063D10 | 74185  | Gbe1          | glucan (1,4-alpha-), branching enzyme 1                                              | 0.44152 |
| H3003E07 | #N/A   | #N/A          | #N/A                                                                                 | 0.38992 |
| H3003D08 | 213539 | Bag2          | BCL2-associated athanogene 2                                                         | 0.5305  |
| H3017E11 | 50497  | Hspa14        | heat shock protein 14                                                                | 0.41618 |
| H3048E11 | #N/A   | #N/A          | #N/A                                                                                 | 0.47094 |
| H3013C11 | 21454  | Tcp1          | t-complex protein 1                                                                  | 0.42758 |
| H3111A05 | 26441  | Psm4          | proteasome (prosome, macropain) subunit, alpha type 4                                | 0.40424 |
| H3058G09 | 17436  | Me1           | malic enzyme 1, NADP(+)-dependent, cytosolic                                         | 0.49864 |
| H3067F10 | 26909  | Exo1          | exonuclease 1                                                                        | 0.5662  |
| H3158C06 | 72828  | Ubash3b       | ubiquitin associated and SH3 domain containing, B                                    | 0.42466 |
| H3033A06 | #N/A   | #N/A          | #N/A                                                                                 | 0.40186 |
| H3078C06 | 408028 | 9230115E21Rik | RIKEN cDNA 9230115E21 gene                                                           | 1.24352 |
| H3137F01 | #N/A   | #N/A          | #N/A                                                                                 | 0.39862 |
| H3126F01 | 18845  | Plxna2        | plexin A2                                                                            | 0.3736  |
| H3076B12 | 27096  | Trappc3       | trafficking protein particle complex 3                                               | 0.54578 |
| H3011A06 | 67895  | Ppa1          | pyrophosphatase (inorganic) 1                                                        | 0.47916 |
| H3154H06 | 70546  | Zdhhc2        | zinc finger, DHHC domain containing 2                                                | 0.42692 |
| H3132C12 | 218138 | Gmds          | GDP-mannose 4, 6-dehydratase                                                         | 0.4066  |
| H3026H03 | 17215  | Mcm3          | minichromosome maintenance deficient 3 ( <i>S. cerevisiae</i> )                      | 0.4456  |
| H3044H09 | 233315 | Mtmt10        | myotubularin related protein 10                                                      | 0.45404 |
| H3148D06 | 16434  | Itpa          | inosine triphosphatase (nucleoside triphosphate pyrophosphatase)                     | 0.4084  |
| H3104F05 | 69408  | Dnajc17       | DnaJ (Hsp40) homolog, subfamily C, member 17                                         | 0.41732 |
| H3128D08 | 70231  | Gorasp2       | golgi reassembly stacking protein 2                                                  | 0.425   |
| H3030G12 | 15260  | Hira          | histone cell cycle regulation defective homolog A ( <i>S. cerevisiae</i> )           | 0.43562 |
| H3015F01 | 66889  | Rnf128        | ring finger protein 128                                                              | 0.43832 |
| H3153H08 | 50786  | Hs6st2        | heparan sulfate 6-O-sulfotransferase 2                                               | 0.40064 |
| H3031G04 | 56095  | Ftsj3         | FtsJ homolog 3 ( <i>E. coli</i> )                                                    | 0.3936  |
| H3122H08 | 338523 | Jhdm1d        | jumonji C domain-containing histone demethylase 1 homolog D ( <i>S. cerevisiae</i> ) | 0.51594 |
| H3151A07 | 68966  | Ngdn          | neuroguidin, EIF4E binding protein                                                   | 0.36264 |
| H3134B08 | 17936  | Nab1          | Ngfi-A binding protein 1                                                             | 0.42196 |
| H3029D01 | 20535  | Slc4a2        | solute carrier family 4 (anion exchanger), member 2                                  | 0.41052 |
| H3118F12 | 233103 | 4931406P16Rik | RIKEN cDNA 4931406P16 gene                                                           | 0.37908 |
| H3028F12 | 68729  | Trim37        | tripartite motif-containing 37                                                       | 0.3695  |
| H3079B08 | 320685 | Dctd          | dCMP deaminase                                                                       | 0.37788 |

|          |        |          |                                                                     |         |
|----------|--------|----------|---------------------------------------------------------------------|---------|
| H3135H04 | 22117  | Tst      | thiosulfate sulfurtransferase, mitochondrial                        | 0.47184 |
| H3149G12 | 57230  | Sap30bp  | SAP30 binding protein                                               | 0.36778 |
| H3076F09 | 66713  | Actr2    | ARP2 actin-related protein 2 homolog (yeast)                        | 0.42838 |
| H3148C02 | 50786  | Hs6st2   | heparan sulfate 6-O-sulfotransferase 2                              | 0.42522 |
| H3099D06 | 14725  | Lrp2     | low density lipoprotein receptor-related protein 2                  | 0.37032 |
| H3080H01 | 22273  | Uqcrc1   | ubiquinol-cytochrome c reductase core protein 1                     | 0.3787  |
| H3153E05 | 26428  | Orc4l    | origin recognition complex, subunit 4-like ( <i>S. cerevisiae</i> ) | 0.44034 |
| H3110H02 | #N/A   | #N/A     | #N/A                                                                | 0.50354 |
| H3133H12 | 233073 | U2af14   | U2 small nuclear RNA auxiliary factor 1-like 4                      | 0.36158 |
| H3049E07 | 67834  | Idh3a    | isocitrate dehydrogenase 3 (NAD+) alpha                             | 0.44098 |
| H3108H02 | 58194  | Sh3kbp1  | SH3-domain kinase binding protein 1                                 | 0.49758 |
| H3010B05 | 13821  | Epb4.1l1 | erythrocyte protein band 4.1-like 1                                 | 0.37482 |
| H3118A02 | 66131  | Tipin    | timeless interacting protein                                        | 0.3555  |
| H3073E09 | 68083  | Pak1ip1  | PAK1 interacting protein 1                                          | 0.34898 |
| H3031H04 | 16419  | Itgb5    | integrin beta 5                                                     | 0.46424 |
| H3024H04 | 207214 | Larp4    | La ribonucleoprotein domain family, member 4                        | 0.34904 |
| H3024D12 | 13723  | Emb      | embigin                                                             | 0.41282 |
| H3038B02 | 73945  | Otud4    | OTU domain containing 4                                             | 0.40466 |
| H3009C05 | 56207  | UchL5    | ubiquitin carboxyl-terminal esterase L5                             | 0.38246 |
| H3009E09 | 52033  | Pbk      | PDZ binding kinase                                                  | 0.36682 |
| H3153F08 | 107817 | Jmjd6    | jumonji domain containing 6                                         | 0.3932  |
| H3079G03 | 69902  | Mrto4    | MRT4, mRNA turnover 4, homolog ( <i>S. cerevisiae</i> )             | 0.34424 |
| H3047B04 | #N/A   | #N/A     | #N/A                                                                | 0.41728 |
| H3079A09 | 12428  | Ccna2    | cyclin A2                                                           | 0.38502 |
| H3127B05 | 269424 | Phf17    | PHD finger protein 17                                               | 0.43504 |
| H3077F07 | 320806 | Gfm2     | G elongation factor, mitochondrial 2                                | 0.448   |
| H3152A07 | 233833 | Tnrc6a   | trinucleotide repeat containing 6a                                  | 0.3694  |
| H3085E04 | 72201  | Otud6b   | OTU domain containing 6B                                            | 0.48422 |

**List of genes repressed by SS18-SSX1 expression in STO**

| probeset | gene id | gene symbol   | gene name                                                               | logFC    |
|----------|---------|---------------|-------------------------------------------------------------------------|----------|
| H3109A04 | 72289   | Malat1        | metastasis associated lung adenocarcinoma transcript 1 (non-coding RNA) | -1.42866 |
| H3129A01 | 11668   | Aldh1a1       | aldehyde dehydrogenase family 1, subfamily A1                           | -0.77854 |
| H3139E04 | 12266   | C3            | complement component 3                                                  | -0.92912 |
| H3005A04 | 14955   | H19           | H19 fetal liver mRNA                                                    | -1.07192 |
| H3144B07 | 14955   | H19           | H19 fetal liver mRNA                                                    | -1.09972 |
| H3133E08 | 19280   | Ptprs         | protein tyrosine phosphatase, receptor type, S                          | -0.75948 |
| H3036D07 | #N/A    | #N/A          | #N/A                                                                    | -0.91702 |
| H3106G12 | 105559  | Mbnl2         | muscleblind-like 2                                                      | -0.8899  |
| H3026H06 | 22196   | Ube2i         | ubiquitin-conjugating enzyme E2I                                        | -0.86934 |
| H3003G06 | #N/A    | #N/A          | #N/A                                                                    | -0.8707  |
| H3148D05 | 13179   | Dcn           | decorin                                                                 | -1.13488 |
| H3131G12 | #N/A    | #N/A          | #N/A                                                                    | -0.68114 |
| H3052D04 | #N/A    | #N/A          | #N/A                                                                    | -1.17404 |
| H3040A09 | 216441  | Slc26a10      | solute carrier family 26, member 10                                     | -0.83512 |
| H3055F08 | 21923   | Tnc           | tenascin C                                                              | -1.15208 |
| H3047C02 | 210711  | 1110007A13Rik | RIKEN cDNA 1110007A13 gene                                              | -1.21264 |
| H3075F03 | 50908   | C1s           | complement component 1, s subcomponent                                  | -0.80254 |
| H3144B06 | 14955   | H19           | H19 fetal liver mRNA                                                    | -0.97444 |
| H3009F01 | 81910   | Rrbp1         | ribosome binding protein 1                                              | -0.84842 |
| H3026H11 | 19155   | Npepps        | aminopeptidase puromycin sensitive                                      | -0.65592 |
| H3096D08 | 433762  | LOC433762     | hypothetical gene LOC433762                                             | -0.64662 |
| H3093A05 | 71175   | Nipbl         | Nipped-B homolog (Drosophila)                                           | -0.70654 |
| H3135A05 | 15364   | Hmga2         | high mobility group AT-hook 2                                           | -0.75896 |
| H3076G06 | 20847   | Stat2         | signal transducer and activator of transcription 2                      | -0.6854  |
| H3079D11 | 20496   | Slc12a2       | solute carrier family 12, member 2                                      | -0.74194 |
| H3123G09 | 14955   | H19           | H19 fetal liver mRNA                                                    | -0.99302 |
| H3139C10 | #N/A    | #N/A          | #N/A                                                                    | -1.09738 |
| H3063C08 | 209387  | AI451617      | expressed sequence AI451617                                             | -0.64124 |
| H3156C02 | 18616   | Peg3          | paternally expressed 3                                                  | -0.9162  |
| H3138F12 | 20971   | Sdc4          | syndecan 4                                                              | -0.65978 |
| H3010H10 | 72289   | Malat1        | metastasis associated lung adenocarcinoma transcript 1 (non-coding RNA) | -1.24618 |
| H3056B01 | #N/A    | #N/A          | #N/A                                                                    | -1.26848 |
| H3153C03 | 19712   | Rest          | RE1-silencing transcription factor                                      | -0.80806 |
| H3026D04 | 12444   | Ccnd2         | cyclin D2                                                               | -0.58066 |
| H3054D10 | #N/A    | #N/A          | #N/A                                                                    | -0.96254 |
| H3145H12 | 20185   | Ncor1         | nuclear receptor co-repressor 1                                         | -0.5769  |
| H3151G01 | 81898   | Sf3b1         | splicing factor 3b, subunit 1                                           | -0.88118 |
| H3055D06 | #N/A    | #N/A          | #N/A                                                                    | -1.27962 |
| H3054E03 | #N/A    | #N/A          | #N/A                                                                    | -1.1635  |
| H3053F05 | #N/A    | #N/A          | #N/A                                                                    | -1.1896  |
| H3134H12 | #N/A    | #N/A          | #N/A                                                                    | -0.64432 |
| H3053F04 | #N/A    | #N/A          | #N/A                                                                    | -0.97326 |

|          |        |               |                                                                      |          |
|----------|--------|---------------|----------------------------------------------------------------------|----------|
| H3027D08 | 71844  | Nupl1         | nucleoporin like 1                                                   | -0.58932 |
| H3053H09 | #N/A   | #N/A          | #N/A                                                                 | -0.92874 |
| H3097D08 | 433762 | LOC433762     | hypothetical gene LOC433762                                          | -0.61486 |
| H3116C04 | 20336  | Exoc4         | exocyst complex component 4                                          | -0.5678  |
| H3052B12 | #N/A   | #N/A          | #N/A                                                                 | -1.199   |
| H3149H07 | 16391  | Irf9          | interferon regulatory factor 9                                       | -0.66974 |
| H3012B10 | #N/A   | #N/A          | #N/A                                                                 | -0.77512 |
| H3027C09 | 77087  | Ankrd11       | ankyrin repeat domain 11                                             | -0.63784 |
| H3056F09 | #N/A   | #N/A          | #N/A                                                                 | -1.24248 |
| H3061F08 | 74450  | Pank2         | pantothenate kinase 2 (Hallervorden-Spatz syndrome)                  | -0.54916 |
| H3112E12 | 17118  | Marcks        | myristoylated alanine rich protein kinase C substrate                | -0.64238 |
| H3116F10 | #N/A   | #N/A          | #N/A                                                                 | -0.97118 |
| H3016H10 | 20683  | Sp1           | trans-acting transcription factor 1                                  | -0.79978 |
| H3097A09 | #N/A   | #N/A          | #N/A                                                                 | -0.71636 |
| H3009C07 | 15519  | Hsp90aa1      | heat shock protein 90, alpha (cytosolic), class A member 1           | -0.62738 |
| H3132A10 | #N/A   | #N/A          | #N/A                                                                 | -0.94702 |
| H3156E08 | 76824  | 2410166I05Rik | RIKEN cDNA 2410166I05 gene                                           | -0.67154 |
| H3023A06 | 67039  | Rbm25         | RNA binding motif protein 25                                         | -0.8308  |
| H3150E08 | 399510 | Map4k5        | mitogen-activated protein kinase kinase kinase kinase 5              | -0.77622 |
| H3143C06 | 18764  | Pkd2          | polycystic kidney disease 2                                          | -0.67012 |
| H3148C04 | 100434 | Slc44a1       | solute carrier family 44, member 1                                   | -0.5239  |
| H3071G01 | 81702  | Ankrd17       | ankyrin repeat domain 17                                             | -0.52878 |
| H3109A10 | 56374  | Tmem59        | transmembrane protein 59                                             | -0.54972 |
| H3124H07 | 11819  | Nr2f2         | nuclear receptor subfamily 2, group F, member 2                      | -0.60778 |
| H3156G08 | #N/A   | #N/A          | #N/A                                                                 | -0.62182 |
| H3048F02 | 227331 | Gigyf2        | GRB10 interacting GYF protein 2                                      | -0.73822 |
| H3154H12 | 67869  | Paip2         | polyadenylate-binding protein-interacting protein 2                  | -0.75394 |
| H3117F07 | 50791  | Magi2         | membrane associated guanylate kinase, WW and PDZ domain containing 2 | -0.60912 |
| H3069C05 | 109331 | Rnf20         | ring finger protein 20                                               | -0.65232 |
| H3157F03 | 67248  | Rpl39         | ribosomal protein L39                                                | -0.65936 |
| H3129B08 | 14955  | H19           | H19 fetal liver mRNA                                                 | -0.96694 |
| H3104C04 | #N/A   | #N/A          | #N/A                                                                 | -0.55256 |
| H3052H06 | 67916  | Ppap2b        | phosphatidic acid phosphatase type 2B                                | -0.66484 |
| H3153G01 | 14132  | Fcgrt         | Fc receptor, IgG, alpha chain transporter                            | -0.61424 |
| H3053A07 | 20238  | Atxn1         | ataxin 1                                                             | -0.53    |
| H3111C03 | #N/A   | #N/A          | #N/A                                                                 | -0.50272 |
| H3099G09 | 76524  | Cln6          | ceroid-lipofuscinosis, neuronal 6                                    | -0.59234 |
| H3051A01 | #N/A   | #N/A          | #N/A                                                                 | -1.19376 |
| H3136A07 | 12843  | Col1a2        | collagen, type I, alpha 2                                            | -0.61242 |
| H3002D02 | 11461  | Actb          | actin, beta                                                          | -0.57722 |
| H3088H06 | 218952 | Fermt2        | fermitin family homolog 2 (Drosophila)                               | -0.5481  |
| H3118F04 | 67974  | Ccny          | cyclin Y                                                             | -0.81934 |
| H3154B07 | 16432  | Itn2b         | integral membrane protein 2B                                         | -0.51112 |
| H3148C08 | 12388  | Ctnnd1        | catenin (cadherin associated protein), delta 1                       | -0.63048 |
| H3042C07 | 233532 | Rsf1          | remodeling and spacing factor 1                                      | -0.70672 |

|          |        |               |                                                            |          |
|----------|--------|---------------|------------------------------------------------------------|----------|
| H3116C02 | 17998  | #N/A          | #N/A                                                       | -0.4804  |
| H3036B02 | 74383  | Ubap2l        | ubiquitin associated protein 2-like                        | -0.49888 |
| H3110C09 | 18810  | Plec1         | plectin 1                                                  | -0.50198 |
| H3034H03 | 66923  | Pbrm1         | polybromo 1                                                | -0.7592  |
| H3069D01 | 83946  | Phip          | pleckstrin homology domain interacting protein             | -0.48882 |
| H3022A11 | 109624 | Cald1         | caldesmon 1                                                | -0.87976 |
| H3097B10 | 69188  | Mll5          | myeloid/lymphoid or mixed-lineage leukemia 5               | -0.63786 |
| H3001D01 | 66691  | Gapvd1        | GTPase activating protein and VPS9 domains 1               | -0.76548 |
| H3087H03 | 66660  | Sltm          | SAFB-like, transcription modulator                         | -0.47934 |
| H3138C11 | 11426  | Macf1         | microtubule-actin crosslinking factor 1                    | -0.50358 |
| H3006G03 | 19155  | Npepps        | aminopeptidase puromycin sensitive                         | -0.5458  |
| H3137A05 | 218543 | Sfrs12        | splicing factor, arginine/serine-rich 12                   | -0.58552 |
| H3149A09 | 16004  | Igf2r         | insulin-like growth factor 2 receptor                      | -0.53858 |
| H3066E04 | 228005 | Ppig          | peptidyl-prolyl isomerase G (cyclophilin G)                | -0.59768 |
| H3067F01 | 229700 | Rbm15         | RNA binding motif protein 15                               | -0.7538  |
| H3004G02 | 66360  | 2310002J21Rik | RIKEN cDNA 2310002J21 gene                                 | -0.53276 |
| H3040E06 | 15364  | Hmga2         | high mobility group AT-hook 2                              | -0.58624 |
| H3131B06 | 51886  | Fubp1         | far upstream element (FUSE) binding protein 1              | -0.51312 |
| H3062B09 | 213109 | Phf3          | PHD finger protein 3                                       | -0.453   |
| H3128A09 | 208146 | Yeats2        | YEATS domain containing 2                                  | -0.61818 |
| H3133B12 | 13179  | Dcn           | decorin                                                    | -0.66162 |
| H3034H02 | #N/A   | #N/A          | #N/A                                                       | -0.638   |
| H3040G06 | 208643 | Eif4g1        | eukaryotic translation initiation factor 4, gamma 1        | -0.62904 |
| H3002D05 | 56490  | Zbtb20        | zinc finger and BTB domain containing 20                   | -0.78504 |
| H3146F11 | 223649 | Nrbp2         | nuclear receptor binding protein 2                         | -0.5559  |
| H3059G04 | 319604 | Fam168a       | family with sequence similarity 168, member A              | -0.6015  |
| H3038F02 | 17425  | Foxk1         | forkhead box K1                                            | -0.47306 |
| H3003G11 | 14042  | Ext1          | exostoses (multiple) 1                                     | -0.59812 |
| H3052A11 | 77652  | Zfp422-rs1    | zinc finger protein 422, related sequence 1                | -0.6516  |
| H3135A01 | 19055  | Ppp3ca        | protein phosphatase 3, catalytic subunit, alpha isoform    | -0.46444 |
| H3111D03 | 75605  | Jarid1b       | jumonji, AT rich interactive domain 1B (Rbp2 like)         | -0.49458 |
| H3154B05 | 15531  | Ndst1         | N-deacetylase/N-sulfotransferase (heparan glucosaminyl) 1  | -0.72358 |
| H3023F02 | 18720  | Pip5k1a       | phosphatidylinositol-4-phosphate 5-kinase, type 1 alpha    | -0.60892 |
| H3125C04 | 68799  | Rgmb          | RGM domain family, member B                                | -0.65886 |
| H3024C11 | 15519  | Hsp90aa1      | heat shock protein 90, alpha (cytosolic), class A member 1 | -0.50112 |
| H3148G01 | 54169  | Myst4         | MYST histone acetyltransferase monocytic leukemia 4        | -0.46926 |
| H3118B11 | 75302  | Asxl2         | additional sex combs like 2 (Drosophila)                   | -0.42534 |
| H3048D02 | 103583 | Fbxw11        | F-box and WD-40 domain protein 11                          | -0.45302 |
| H3008B05 | 13138  | Dag1          | dystroglycan 1                                             | -0.64182 |
| H3148A03 | 28193  | Reep3         | receptor accessory protein 3                               | -0.49032 |
| H3084G03 | 14281  | Fos           | FBJ osteosarcoma oncogene                                  | -0.48142 |
| H3050D08 | 75785  | Klhl24        | kelch-like 24 (Drosophila)                                 | -0.47994 |
| H3017H09 | 212391 | Lcor          | ligand dependent nuclear receptor corepressor              | -0.6554  |
| H3096H03 | #N/A   | #N/A          | #N/A                                                       | -0.69146 |
| H3081H01 | 241296 | Lrrc8a        | leucine rich repeat containing 8A                          | -0.58506 |

|          |        |            |                                                                                               |          |
|----------|--------|------------|-----------------------------------------------------------------------------------------------|----------|
| H3056E10 | 242509 | Bnc2       | basonuclin 2                                                                                  | -0.42762 |
| H3001E08 | #N/A   | #N/A       | #N/A                                                                                          | -0.57694 |
| H3151H12 | 66168  | Grina      | glutamate receptor, ionotropic, N-methyl D-aspartate-associated protein 1 (glutamate binding) | -0.57266 |
| H3040C01 | 231051 | Mll3       | myeloid/lymphoid or mixed-lineage leukemia 3                                                  | -0.58158 |
| H3028D11 | 267019 | Rps15a     | ribosomal protein S15a                                                                        | -0.45374 |
| H3034C04 | 326622 | Upf2       | UPF2 regulator of nonsense transcripts homolog (yeast)                                        | -0.5139  |
| H3025C06 | 29808  | Mga        | MAX gene associated                                                                           | -0.57288 |
| H3103A07 | 12361  | Cask       | calcium/calmodulin-dependent serine protein kinase (MAGUK family)                             | -0.56908 |
| H3016E10 | 69581  | Rhou       | ras homolog gene family, member U                                                             | -0.43082 |
| H3095H09 | 320713 | Mysm1      | myb-like, SWIRM and MPN domains 1                                                             | -0.48058 |
| H3036C11 | 192196 | Luc7l2     | LUC7-like 2 ( <i>S. cerevisiae</i> )                                                          | -0.62632 |
| H3146G02 | 12628  | Cfh        | complement component factor h                                                                 | -0.49814 |
| H3002F10 | 11820  | App        | amyloid beta (A4) precursor protein                                                           | -0.4782  |
| H3035B06 | 20658  | Son        | Son DNA binding protein                                                                       | -0.57292 |
| H3041C04 | 75605  | Jarid1b    | jumonji, AT rich interactive domain 1B (Rbp2 like)                                            | -0.4741  |
| H3139F04 | 105522 | Ankrd28    | ankyrin repeat domain 28                                                                      | -0.52222 |
| H3020A08 | 53323  | Ube2k      | ubiquitin-conjugating enzyme E2K (UBC1 homolog, yeast)                                        | -0.58836 |
| H3125F12 | 13726  | Emd        | emerin                                                                                        | -0.47724 |
| H3025D08 | 11569  | Aebp2      | AE binding protein 2                                                                          | -0.41316 |
| H3004D05 | 103080 | Sept10     | septin 10                                                                                     | -0.40456 |
| H3119B01 | #N/A   | #N/A       | #N/A                                                                                          | -0.66466 |
| H3009F02 | 17999  | Nedd4      | neural precursor cell expressed, developmentally down-regulated 4                             | -0.50504 |
| H3064G05 | 66970  | Ssbp2      | single-stranded DNA binding protein 2                                                         | -0.4384  |
| H3007H04 | 230584 | Yip1       | Yip1 domain family, member 1                                                                  | -0.48326 |
| H3085G06 | 219132 | D14Ert668e | DNA segment, Chr 14, ERATO Doi 668, expressed                                                 | -0.50506 |
| H3157D02 | 16145  | Igtp       | interferon gamma induced GTPase                                                               | -0.44396 |
| H3032D03 | 18595  | Pdgfra     | platelet derived growth factor receptor, alpha polypeptide                                    | -0.47026 |
| H3133F12 | 12444  | Ccnd2      | cyclin D2                                                                                     | -0.4247  |
| H3122G01 | 20280  | Scp2       | sterol carrier protein 2, liver                                                               | -0.4365  |
| H3121G09 | 13003  | Vcan       | versican                                                                                      | -0.42754 |
| H3119G07 | 76357  | Trmt5      | TRM5 tRNA methyltransferase 5 homolog ( <i>S. cerevisiae</i> )                                | -0.5032  |
| H3055G07 | 21808  | Tgfb2      | transforming growth factor, beta 2                                                            | -0.6447  |
| H3117B01 | 12444  | Ccnd2      | cyclin D2                                                                                     | -0.4287  |
| H3062G04 | 229503 | BC023814   | cDNA sequence BC023814                                                                        | -0.44534 |
| H3095A12 | #N/A   | #N/A       | #N/A                                                                                          | -0.43466 |
| H3095F01 | #N/A   | #N/A       | #N/A                                                                                          | -0.52986 |
| H3012G06 | 67554  | Slc25a30   | solute carrier family 25, member 30                                                           | -0.47186 |
| H3030C03 | 67500  | Ccar1      | cell division cycle and apoptosis regulator 1                                                 | -0.48424 |
| H3024A09 | #N/A   | #N/A       | #N/A                                                                                          | -0.40556 |
| H3053F02 | #N/A   | #N/A       | #N/A                                                                                          | -0.55268 |
| H3069C09 | 19877  | Rock1      | Rho-associated coiled-coil containing protein kinase 1                                        | -0.48204 |
| H3044B05 | 20462  | Sfrs10     | splicing factor, arginine/serine-rich 10 (transformer 2 homolog, <i>Drosophila</i> )          | -0.58348 |
| H3049H10 | 232341 | Wnk1       | WNK lysine deficient protein kinase 1                                                         | -1.12172 |
| H3042A04 | #N/A   | #N/A       | #N/A                                                                                          | -0.39818 |

|          |        |               |                                                                                    |          |
|----------|--------|---------------|------------------------------------------------------------------------------------|----------|
| H3114B10 | 108927 | Lhfp          | lipoma HMGIC fusion partner                                                        | -0.52652 |
| H3002G06 | 75956  | Srrm2         | serine/arginine repetitive matrix 2                                                | -0.5679  |
| H3091C01 | 16974  | Lrp6          | low density lipoprotein receptor-related protein 6                                 | -0.49074 |
| H3152D12 | 12825  | Col3a1        | collagen, type III, alpha 1                                                        | -0.57898 |
| H3079A03 | #N/A   | #N/A          | #N/A                                                                               | -0.7356  |
| H3158G04 | 20848  | Stat3         | signal transducer and activator of transcription 3                                 | -0.6976  |
| H3151C09 | 12520  | Cd81          | CD81 antigen                                                                       | -0.4213  |
| H3147B04 | 14183  | Fgfr2         | fibroblast growth factor receptor 2                                                | -0.4664  |
| H3033D07 | 13867  | ErbB3         | v-erb-b2 erythroblastic leukemia viral oncogene homolog 3 (avian)                  | -0.56918 |
| H3039A03 | 11480  | Acvr2a        | activin receptor IIA                                                               | -0.43578 |
| H3040A12 | 13018  | Ctcf          | CCCTC-binding factor                                                               | -0.6693  |
| H3103D02 | 241846 | Lsm14b        | LSM14 homolog B (SCD6, <i>S. cerevisiae</i> )                                      | -0.81898 |
| H3137F02 | 76199  | Med13l        | mediator complex subunit 13-like                                                   | -0.5966  |
| H3040E01 | 26965  | Cul1          | cullin 1                                                                           | -0.47126 |
| H3002F06 | 13669  | Eif3a         | eukaryotic translation initiation factor 3, subunit A                              | -1.09986 |
| H3050D01 | 232217 | 4933427D06Rik | RIKEN cDNA 4933427D06 gene                                                         | -0.63044 |
| H3143D11 | 18027  | Nfia          | nuclear factor I/A                                                                 | -0.47372 |
| H3141E01 | 382643 | #N/A          | #N/A                                                                               | -0.41948 |
| H3019H12 | 26903  | Dysf          | dysferlin                                                                          | -0.48736 |
| H3043F04 | #N/A   | #N/A          | #N/A                                                                               | -0.44918 |
| H3125F02 | 12395  | Runx1t1       | runt-related transcription factor 1; translocated to, 1 (cyclin D-related)         | -0.59098 |
| H3011G10 | 77110  | Gpbp1l1       | GC-rich promoter binding protein 1-like 1                                          | -0.3821  |
| H3050E09 | 72972  | Gcap14        | granule cell antiserum positive 14                                                 | -0.54782 |
| H3023B10 | 22589  | Atrx          | alpha thalassemia/mental retardation syndrome X-linked homolog (human)             | -0.70464 |
| H3074B10 | 66840  | Wdr45l        | Wdr45 like                                                                         | -0.48138 |
| H3139G02 | 98214  | #N/A          | #N/A                                                                               | -0.45524 |
| H3127A04 | 20742  | Spnb2         | spectrin beta 2                                                                    | -0.47338 |
| H3123G01 | 20088  | Rps24         | ribosomal protein S24                                                              | -0.4054  |
| H3133B06 | 12444  | Ccnd2         | cyclin D2                                                                          | -0.47192 |
| H3114A04 | 68193  | Rpl24         | ribosomal protein L24                                                              | -0.43516 |
| H3040A01 | 116848 | Baz2a         | bromodomain adjacent to zinc finger domain, 2A                                     | -0.45854 |
| H3039E07 | #N/A   | #N/A          | #N/A                                                                               | -0.594   |
| H3009G11 | 70387  | Ttc9c         | tetratricopeptide repeat domain 9C                                                 | -0.44894 |
| H3138B01 | 12038  | Bche          | butyrylcholinesterase                                                              | -0.69266 |
| H3131B04 | 20280  | Scp2          | sterol carrier protein 2, liver                                                    | -0.41232 |
| H3085D04 | #N/A   | #N/A          | #N/A                                                                               | -0.43906 |
| H3041F11 | 239647 | Fam113b       | family with sequence similarity 113, member B                                      | -0.47566 |
| H3056F10 | 13858  | Eps15         | epidermal growth factor receptor pathway substrate 15                              | -0.37546 |
| H3125A01 | 99543  | Olfml3        | olfactomedin-like 3                                                                | -0.42458 |
| H3071F07 | #N/A   | #N/A          | #N/A                                                                               | -0.622   |
| H3137F08 | 70579  | Zc3h11a       | zinc finger CCCH type containing 11A                                               | -0.72602 |
| H3143C11 | 72587  | Pan3          | PAN3 polyA specific ribonuclease subunit homolog ( <i>S. cerevisiae</i> )          | -0.42102 |
| H3157D03 | 80859  | Nfkbiz        | nuclear factor of kappa light polypeptide gene enhancer in B-cells inhibitor, zeta | -0.59714 |
| H3072G10 | 228005 | Ppig          | peptidyl-prolyl isomerase G (cyclophilin G)                                        | -0.56218 |
| H3055A03 | 57377  | Gcs1          | glucosidase 1                                                                      | -0.39672 |

|          |        |               |                                                                                 |          |
|----------|--------|---------------|---------------------------------------------------------------------------------|----------|
| H3005F05 | #N/A   | #N/A          | #N/A                                                                            | -0.51508 |
| H3153F11 | 66660  | Sltm          | SAFB-like, transcription modulator                                              | -0.43878 |
| H3095H01 | 214899 | Jarid1a       | jumonji, AT rich interactive domain 1A (Rbp2 like)                              | -0.81912 |
| H3155H07 | #N/A   | #N/A          | #N/A                                                                            | -0.48794 |
| H3122F12 | 20280  | Scp2          | sterol carrier protein 2, liver                                                 | -0.5396  |
| H3044A06 | 76199  | Med13l        | mediator complex subunit 13-like                                                | -0.4453  |
| H3149A05 | 78908  | Igsf3         | immunoglobulin superfamily, member 3                                            | -0.42464 |
| H3108F11 | 12412  | Cbx1          | chromobox homolog 1 (Drosophila HP1 beta)                                       | -0.39058 |
| H3089G07 | #N/A   | #N/A          | #N/A                                                                            | -0.43706 |
| H3120H02 | 399510 | Map4k5        | mitogen-activated protein kinase kinase kinase kinase 5                         | -0.5531  |
| H3038H12 | 57261  | Brd4          | bromodomain containing 4                                                        | -0.43414 |
| H3020H02 | #N/A   | #N/A          | #N/A                                                                            | -0.50488 |
| H3006D04 | 12767  | Cxcr4         | chemokine (C-X-C motif) receptor 4                                              | -0.55564 |
| H3089C03 | 69202  | Ptms          | parathymosin                                                                    | -0.49484 |
| H3144H05 | 71724  | Aox3          | aldehyde oxidase 3                                                              | -0.4162  |
| H3017H07 | #N/A   | #N/A          | #N/A                                                                            | -0.36564 |
| H3039C02 | 26441  | PsmA4         | proteasome (prosome, macropain) subunit, alpha type 4                           | -0.49798 |
| H3044F11 | 17758  | Mtap4         | microtubule-associated protein 4                                                | -0.42598 |
| H3145D11 | 20088  | Rps24         | ribosomal protein S24                                                           | -0.4981  |
| H3082D10 | 218952 | Fermt2        | fermitin family homolog 2 (Drosophila)                                          | -0.39416 |
| H3092H01 | 11964  | Atp6v1a       | ATPase, H+ transporting, lysosomal V1 subunit A                                 | -0.37936 |
| H3069F09 | 109910 | Zfp91         | zinc finger protein 91                                                          | -0.37344 |
| H3052B11 | 18557  | Pctk3         | PCTAIRE-motif protein kinase 3                                                  | -0.62352 |
| H3044E01 | 72425  | 2410042D21Rik | RIKEN cDNA 2410042D21 gene                                                      | -0.48346 |
| H3070C02 | 237436 | Gas2l3        | growth arrest-specific 2 like 3                                                 | -0.50584 |
| H3147A06 | 219024 | Tmem55b       | transmembrane protein 55b                                                       | -0.59738 |
| H3035A11 | 56484  | Foxo3         | forkhead box O3                                                                 | -0.43686 |
| H3045H04 | #N/A   | #N/A          | #N/A                                                                            | -0.44634 |
| H3099B10 | 72930  | Ppp2r2b       | protein phosphatase 2 (formerly 2A), regulatory subunit B (PR 52), beta isoform | -0.4136  |
| H3016D08 | 12177  | Bnip3l        | BCL2/adenovirus E1B interacting protein 3-like                                  | -0.39144 |
| H3047D02 | 11657  | Alb           | albumin                                                                         | -0.49404 |
| H3090D10 | 78801  | Ak7           | adenylate kinase 7                                                              | -0.41964 |
| H3124B09 | 11820  | App           | amyloid beta (A4) precursor protein                                             | -0.40286 |
| H3122E09 | 24086  | Tlk2          | tousled-like kinase 2 (Arabidopsis)                                             | -0.51008 |
| H3029H07 | #N/A   | #N/A          | #N/A                                                                            | -0.41874 |
| H3094B06 | 20658  | Son           | Son DNA binding protein                                                         | -0.49176 |
| H3079D12 | 18807  | Pld3          | phospholipase D family, member 3                                                | -0.36686 |
| H3095A11 | 16563  | Kif2a         | kinesin family member 2A                                                        | -0.55718 |
| H3059B07 | 16451  | Jak1          | Janus kinase 1                                                                  | -0.40752 |
| H3158D11 | 17390  | Mmp2          | matrix metalloproteinase 2                                                      | -0.36918 |
| H3111H03 | 18027  | Nfia          | nuclear factor I/A                                                              | -0.56842 |
| H3090F12 | #N/A   | #N/A          | #N/A                                                                            | -0.46886 |
| H3097H08 | 19646  | Rbbp4         | retinoblastoma binding protein 4                                                | -0.64496 |
| H3134D08 | 18293  | Ogdh          | oxoglutarate dehydrogenase (lipoamide)                                          | -0.38926 |
| H3135A11 | 57294  | Rps27         | ribosomal protein S27                                                           | -0.5731  |



|          |        |               |                                                                              |          |
|----------|--------|---------------|------------------------------------------------------------------------------|----------|
| H3018G12 | 218194 | Phactr1       | phosphatase and actin regulator 1                                            | -0.53524 |
| H3018H10 | 18483  | Palm          | paralemmin                                                                   | -0.44516 |
| H3055A12 | 18477  | Prdx1         | peroxiredoxin 1                                                              | -0.3571  |
| H3136H11 | 399510 | Map4k5        | mitogen-activated protein kinase kinase kinase kinase 5                      | -0.38558 |
| H3118C12 | 267019 | Rps15a        | ribosomal protein S15a                                                       | -0.40486 |
| H3145D12 | 20088  | Rps24         | ribosomal protein S24                                                        | -0.4316  |
| H3110H11 | 19055  | Ppp3ca        | protein phosphatase 3, catalytic subunit, alpha isoform                      | -0.41714 |
| H3115G11 | 14026  | Evl           | Ena-vasodilator stimulated phosphoprotein                                    | -0.4256  |
| H3145E12 | 15587  | Hyal2         | hyaluronoglucosaminidase 2                                                   | -0.38328 |
| H3141B09 | 652994 | #N/A          | #N/A                                                                         | -0.39464 |
| H3044D09 | 20249  | Scd1          | stearoyl-Coenzyme A desaturase 1                                             | -0.44914 |
| H3096B10 | 50905  | Il17rb        | interleukin 17 receptor B                                                    | -0.41034 |
| H3025H11 | 245867 | Pcmt2         | protein-L-isoaspartate (D-aspartate) O-methyltransferase domain containing 2 | -0.36088 |
| H3097A10 | 229675 | Rsb1          | rosbin, round spermatid basic protein 1                                      | -0.39998 |
| H3155D02 | 66898  | Baiap2l1      | BAI1-associated protein 2-like 1                                             | -0.3499  |
| H3133H03 | 11907  | Ate1          | arginyltransferase 1                                                         | -0.41462 |
| H3106B11 | 69270  | Gins1         | GINS complex subunit 1 (Psf1 homolog)                                        | -0.37116 |
| H3010E02 | 242960 | Fbx15         | F-box and leucine-rich repeat protein 5                                      | -0.44388 |
| H3157C11 | 66552  | 2010106G01Rik | RIKEN cDNA 2010106G01 gene                                                   | -0.58414 |
| H3106G02 | #N/A   | #N/A          | #N/A                                                                         | -0.58768 |
| H3053G10 | 13030  | Ctsb          | cathepsin B                                                                  | -0.39264 |
| H3070G02 | 56224  | Tspan5        | tetraspanin 5                                                                | -0.39336 |

**Table S7:** list of primers

| PRIMER NAME                    | 5' TO 3' SEQUENCE                                                          |
|--------------------------------|----------------------------------------------------------------------------|
| <b>CLONING</b>                 |                                                                            |
| SS18-kzFw                      | 5'ACGCGTCGACCCACCATGGGCGGCAACATGTGTG3'                                     |
| SSXnoStopBamHI-R               | 5'CGGGATCCCCCTCGTCATCTTCTCAGGGTCACTGATCTC3'                                |
| V5-Stop-EcoRI-R                | 5'GGAATTCTCAACCGGTACGCGTAGAATCGAGACCGAG3'                                  |
| EcoRI-stop-SSX-HA-R            | 5'GGAATTCCTCAGCTTGCCTAGTCTGGGACGTCGTATGGGTATCCCTCGTCATCTTCTCAGGGTCACTGAT3' |
| MluI-stopSSX1-R                | 5'CGACGCGTTTACTCGTCATCTTCTCA3'                                             |
| mLEF-1kzFw                     | 5'GCCGCCACCATGCCCAACTTTCGGGAGG3'                                           |
| mLEF-1-HA-R                    | 5'GGAATTCCTCAGCTTGCCTAGTCTGGGAGGTCGTATGGGTATCCGATGTAGGCAGCTGTCATT3'        |
| <b>qPCR</b>                    |                                                                            |
| SS18-SSX Fw                    | 5'ATAGACCAACACAGCCTGGAC 3'                                                 |
| SS18-SSX R                     | 5'CTTCTTGGGCATGATCTGG 3'                                                   |
| hSS18 Fw                       | 5'TGGAGGATATAGACCAACACAGC 3'                                               |
| hSS18 R                        | 5'TGCTGGTAATTTCCATACTGTCC 3'                                               |
| Mouse Axin2-Fw                 | 5'CGAGTGTGAGATCCACGGAAA3'                                                  |
| Mouse Axin2-R                  | 5'GACTGGGTCGCTTCTCTTAA3'                                                   |
| Mouse Axin2-5'UTR-Fw           | 5'CAAAGGAGAGCTTTGCTGTA AAA3'                                               |
| Mouse Axin2-5'UTR-R            | 5'GCGTCTCACTGAGTTTGGATT3'                                                  |
| Human Axin2-Fw                 | 5'GCAGTGTGAAGCCAATGG3'                                                     |
| Human Axin2-R                  | 5'GCAGGCGGTGGGTTCTC3'                                                      |
| mouseLEF-1 Fw                  | 5'CAGCAACCTTACCCTGAGGTCA3'                                                 |
| mouseLEF-1 R                   | 5'CGGCTTCTTTTTGGAAGTCG3'                                                   |
| HumanLEF-1 Fw                  | 5'AAACAGGAACATCCCCACAC3'                                                   |
| HumanLEF-1 R                   | 5'CAGAGGCTTCTTAATGTGAGGTC3'                                                |
| Mouse $\beta$ -cateninF        | 5'TGCAGATCTTGGACTGGACA3'                                                   |
| Mouse $\beta$ -cateninR        | 5'AAGAACGGTAGCTGGGATCA3'                                                   |
| Mouse TCF7L1-Fw                | 5'GCTCCAGTATTACCCCTCA3'                                                    |
| Mouse TCF7L1-R                 | 5'GGACCTTCTCGGCTGAGTA3'                                                    |
| Mouse TCF7L2-Fw                | 5'AAATGGCCACTGCTTGATGT3'                                                   |
| Mouse TCF7L1-R                 | 5'GCACCACCGGTACTTTGTTC3'                                                   |
| <b>CHROMATIN ACCESSIBILITY</b> |                                                                            |
| mAxin2(-3122-3038)Fw           | 5'CTGGAGA ACTTGAAACATGAAATC3'                                              |
| mAxin2(-3122-3038)R            | 5'CTTCTTGGCCCTCGTCT3' 3 MspI sites                                         |
| mAxin2(-2939-2843)Fw           | 5'GAGCGCCTCTGTGATTGG3'                                                     |
| mAxin2(-2939-2843)R            | 5'TGCCAGGACCTTATCAAAGC3' 3 MspI sites                                      |
| mAxin2(-1238-1090)Fw           | 5'CCACCACTTCGGGTTTGT3'                                                     |
| mAxin2(-1238-1090)R            | 5'GCCAGGGAAGGATCAAATA3' 3 MspI sites                                       |

|                     |                                      |               |
|---------------------|--------------------------------------|---------------|
| mAxin2(-947-856)Fw  | 5'TGGCTCTAGGAGGTGGACTG3'             |               |
| mAxin2(-947-856)R   | 5'AACTTAGAGGCTTTGATCTTCAAAC3'        | 1 MspI site   |
| mAxin2(+262+333)Fw  | 5'ACCAGGATGGTGCATACCTC3'             |               |
| mAxin2(+262+333)R   | 5'ACCAGAAGTCCAGCGTATCC3'             | 1 MspI site   |
| mAxin2(+476+545)Fw  | 5'TGGGATCAAGAAGCAACAGA3'             |               |
| mAxin2(+476+545)R   | 5'CATCACTGCCTGGATCTCG3'              | no MspI sites |
| mGAPDH-Fw           | 5'ACCACCAACTGCTTAGCCCCCTGGCAA3'      |               |
| mGAPDH-R            | 5'GGATGCAGGGATGATGTTCTGGGCAGCCCCAC3' | no MspI sites |
| <b>CHROMATIN IP</b> |                                      |               |
| mAxin2pr -1731 Fw   | 5'GATACAGATGCATTATGGGAACAC3'         |               |
| mAxin2pr -1731 R    | 5'GCCTCAAATCCACAGCCTA3'              |               |
| mAxin2pr -390 Fw    | 5'CTGGAGAACTTGAAACATGAAATC3'         |               |
| mAxin2pr -390 R     | 5'CTTCCTTGGCCCTCGTCT3'               |               |
| mAxin2pr -147 Fw    | 5'GAGCGCCTCTGTGATTGG3'               |               |
| mAxin2pr -147 R     | 5'TGCCAGGACCTTATCAAAGC3'             |               |
| mAxin2pr +182 Fw    | 5'TAGTAGAGGGGTGCGGATTG3'             |               |
| mAxin2pr +182 R     | 5'TCCTGGAAGGGAGGTATGC3'              |               |
| mAxin2pr +1554 Fw   | 5'CCACCACTTCGGGTTTGT3'               |               |
| mAxin2pr +2377 R    | 5'GCCAGGGAAGGATCAAAC3'               |               |
| mAxin2pr +2377 Fw   | 5'ACCTCCCGTGTCACTGTTTC3'             |               |
| mAxin2pr +1554 R    | 5'AGCTCCACACACTTTTTCC3'              |               |
| mAxin2pr +3054 Fw   | 5'ACCAGGATGGTGCATACCTC3'             |               |
| mAxin2pr +3054 R    | 5'ACCAGAAGTCCAGCGTATCC3'             |               |
| mAxin2pr +3268 Fw   | 5'TGGCATCAAGAAGCAACAGA3'             |               |
| mAxin2pr +3268 R    | 5'CATCACTGCCTGGATCTCG3'              |               |
| Chr6intergenicF     | 5'GGGCTGGTGGTGTCTAC3'                |               |
| Chr6intergenicR     | 5'TCAAATGCAGAAGCAGATAA3'             |               |
